# Supplementary material for: Onset of Action of Selected Second-Generation Antipsychotics (Pines)–A Systematic Review and Meta-Analyses
Source: MDPI journal article supplement (doi:10.3390/biomedicines11010082), 2022-12-29
Supplement: s1 [file s1]

# Supplementary data

## Onset of action of selected Second-Generation Antipsychotics (the pines) A Systematic Review and Meta-Analyses

R. Meyer, K. Skov, I.K. Dhillon, E. Olsson, N. Graudal, L. Baandrup, G. Jürgens

### Index

|                                                                                               |           |
|-----------------------------------------------------------------------------------------------|-----------|
| <b>Supplemental 1 – PRISMA-checklist.....</b>                                                 | <b>3</b>  |
| <b>Supplemental 2 – Search strategies .....</b>                                               | <b>6</b>  |
| MEDLINE .....                                                                                 | 6         |
| EMBASE .....                                                                                  | 6         |
| Cochrane Central Register of Controlled Trials (CENTRAL).....                                 | 6         |
| PsycINFO .....                                                                                | 6         |
| <b>Supplemental 3 – Study characteristics .....</b>                                           | <b>7</b>  |
| <b>Supplemental 4 – Risk of Bias Assessment .....</b>                                         | <b>31</b> |
| <b>Supplemental 5 – Forest plots .....</b>                                                    | <b>33</b> |
| Pooled meta-analyses for immediate release and transdermal drug delivery antipsychotics ..... | 33        |
| Asenapine.....                                                                                | 36        |
| Asenapine, transdermal .....                                                                  | 37        |
| Olanzapine.....                                                                               | 38        |
| Quetiapine .....                                                                              | 40        |
| Zotepine .....                                                                                | 41        |
| Olanzapine, Long-acting Injections.....                                                       | 42        |
| Quetiapine, Extended Release.....                                                             | 44        |
| <b>Supplemental 6 – Sensitivity analysis, sequentially data only .....</b>                    | <b>45</b> |
| Asenapine sequentially data only .....                                                        | 45        |
| Olanzapine sequentially data only.....                                                        | 46        |
| Quetiapine sequentially data only .....                                                       | 47        |
| Zotepine sequentially data only .....                                                         | 49        |
| <b>Supplemental 7 – Sensitivity analyses, enriched vs non-enriched.....</b>                   | <b>51</b> |
| Asenapine, enriched and non-enriched .....                                                    | 51        |

|                                                                                      |           |
|--------------------------------------------------------------------------------------|-----------|
| <i>Olanzapine, enriched and non-enriched .....</i>                                   | <i>51</i> |
| <i>Quetiapine, enriched and non-enriched .....</i>                                   | <i>52</i> |
| <i>Quetiapine XR, enriched and non-enriched .....</i>                                | <i>53</i> |
| <b>Supplemental 8 – Sensitivity analyses, withdrawal of placebo-responders .....</b> | <b>54</b> |
| <i>Olanzapine, without studies reporting withdrawal of placebo-responders.....</i>   | <i>54</i> |
| <i>Quetiapine, without studies reporting withdrawal of placebo-responders .....</i>  | <i>54</i> |
| <i>Zotepine, without studies reporting withdrawal of placebo-responders .....</i>    | <i>55</i> |
| <b>References .....</b>                                                              | <b>56</b> |

## Supplemental 1 – PRISMA-checklist [1]

| Section and Topic             | Item # | Checklist item                                                                                                                                                                                                                                                                                       | Location where item is reported |
|-------------------------------|--------|------------------------------------------------------------------------------------------------------------------------------------------------------------------------------------------------------------------------------------------------------------------------------------------------------|---------------------------------|
| <b>TITLE</b>                  |        |                                                                                                                                                                                                                                                                                                      |                                 |
| Title                         | 1      | Identify the report as a systematic review.                                                                                                                                                                                                                                                          | Title                           |
| <b>ABSTRACT</b>               |        |                                                                                                                                                                                                                                                                                                      |                                 |
| Abstract                      | 2      | See the PRISMA 2020 for Abstracts checklist.                                                                                                                                                                                                                                                         | Abstract                        |
| <b>INTRODUCTION</b>           |        |                                                                                                                                                                                                                                                                                                      |                                 |
| Rationale                     | 3      | Describe the rationale for the review in the context of existing knowledge.                                                                                                                                                                                                                          | 1                               |
| Objectives                    | 4      | Provide an explicit statement of the objective(s) or question(s) the review addresses.                                                                                                                                                                                                               | 1                               |
| <b>METHODS</b>                |        |                                                                                                                                                                                                                                                                                                      |                                 |
| Eligibility criteria          | 5      | Specify the inclusion and exclusion criteria for the review and how studies were grouped for the syntheses.                                                                                                                                                                                          | 2.1-2.4                         |
| Information sources           | 6      | Specify all databases, registers, websites, organisations, reference lists and other sources searched or consulted to identify studies. Specify the date when each source was last searched or consulted.                                                                                            | 2.5                             |
| Search strategy               | 7      | Present the full search strategies for all databases, registers and websites, including any filters and limits used.                                                                                                                                                                                 | The supplementary data file     |
| Selection process             | 8      | Specify the methods used to decide whether a study met the inclusion criteria of the review, including how many reviewers screened each record and each report retrieved, whether they worked independently, and if applicable, details of automation tools used in the process.                     | 2.6                             |
| Data collection process       | 9      | Specify the methods used to collect data from reports, including how many reviewers collected data from each report, whether they worked independently, any processes for obtaining or confirming data from study investigators, and if applicable, details of automation tools used in the process. | 2.7                             |
| Data items                    | 10a    | List and define all outcomes for which data were sought. Specify whether all results that were compatible with each outcome domain in each study were sought (e.g. for all measures, time points, analyses), and if not, the methods used to decide which results to collect.                        | 2.7                             |
|                               | 10b    | List and define all other variables for which data were sought (e.g. participant and intervention characteristics, funding sources). Describe any assumptions made about any missing or unclear information.                                                                                         | 2.7                             |
| Study risk of bias assessment | 11     | Specify the methods used to assess risk of bias in the included studies, including details of the tool(s) used, how many reviewers assessed each study and whether they worked independently, and if applicable, details of automation tools used in the process.                                    | 2.8                             |
| Effect measures               | 12     | Specify for each outcome the effect measure(s) (e.g. risk ratio, mean difference) used in the synthesis or presentation of results.                                                                                                                                                                  | 2.9                             |

| Section and Topic             | Item # | Checklist item                                                                                                                                                                                                                                              | Location where item is reported |
|-------------------------------|--------|-------------------------------------------------------------------------------------------------------------------------------------------------------------------------------------------------------------------------------------------------------------|---------------------------------|
| Synthesis methods             | 13a    | Describe the processes used to decide which studies were eligible for each synthesis (e.g. tabulating the study intervention characteristics and comparing against the planned groups for each synthesis (item #5)).                                        | 2.10                            |
|                               | 13b    | Describe any methods required to prepare the data for presentation or synthesis, such as handling of missing summary statistics, or data conversions.                                                                                                       | 2.7                             |
|                               | 13c    | Describe any methods used to tabulate or visually display results of individual studies and syntheses.                                                                                                                                                      | 2.10                            |
|                               | 13d    | Describe any methods used to synthesize results and provide a rationale for the choice(s). If meta-analysis was performed, describe the model(s), method(s) to identify the presence and extent of statistical heterogeneity, and software package(s) used. | 2.10                            |
|                               | 13e    | Describe any methods used to explore possible causes of heterogeneity among study results (e.g. subgroup analysis, meta-regression).                                                                                                                        | 2.11                            |
|                               | 13f    | Describe any sensitivity analyses conducted to assess robustness of the synthesized results.                                                                                                                                                                | 2.11                            |
| Reporting bias assessment     | 14     | Describe any methods used to assess risk of bias due to missing results in a synthesis (arising from reporting biases).                                                                                                                                     | NA                              |
| Certainty assessment          | 15     | Describe any methods used to assess certainty (or confidence) in the body of evidence for an outcome.                                                                                                                                                       | NA                              |
| <b>RESULTS</b>                |        |                                                                                                                                                                                                                                                             |                                 |
| Study selection               | 16a    | Describe the results of the search and selection process, from the number of records identified in the search to the number of studies included in the review, ideally using a flow diagram.                                                                | Figure 2                        |
|                               | 16b    | Cite studies that might appear to meet the inclusion criteria, but which were excluded, and explain why they were excluded.                                                                                                                                 | Figure 2                        |
| Study characteristics         | 17     | Cite each included study and present its characteristics.                                                                                                                                                                                                   | The supplementary data file     |
| Risk of bias in studies       | 18     | Present assessments of risk of bias for each included study.                                                                                                                                                                                                | The supplementary data file     |
| Results of individual studies | 19     | For all outcomes, present, for each study: (a) summary statistics for each group (where appropriate) and (b) an effect estimate and its precision (e.g. confidence/credible interval), ideally using structured tables or plots.                            | The supplementary data file     |
| Results of syntheses          | 20a    | For each synthesis, briefly summarise the characteristics and risk of bias among contributing studies.                                                                                                                                                      | NA                              |

| Section and Topic                              | Item # | Checklist item                                                                                                                                                                                                                                                                       | Location where item is reported   |
|------------------------------------------------|--------|--------------------------------------------------------------------------------------------------------------------------------------------------------------------------------------------------------------------------------------------------------------------------------------|-----------------------------------|
|                                                | 20b    | Present results of all statistical syntheses conducted. If meta-analysis was done, present for each the summary estimate and its precision (e.g. confidence/credible interval) and measures of statistical heterogeneity. If comparing groups, describe the direction of the effect. | 3.4 + The supplementary data file |
|                                                | 20c    | Present results of all investigations of possible causes of heterogeneity among study results.                                                                                                                                                                                       | 3.5                               |
|                                                | 20d    | Present results of all sensitivity analyses conducted to assess the robustness of the synthesized results.                                                                                                                                                                           | 3.5                               |
| Reporting biases                               | 21     | Present assessments of risk of bias due to missing results (arising from reporting biases) for each synthesis assessed.                                                                                                                                                              | NA                                |
| Certainty of evidence                          | 22     | Present assessments of certainty (or confidence) in the body of evidence for each outcome assessed.                                                                                                                                                                                  | NA                                |
| <b>DISCUSSION</b>                              |        |                                                                                                                                                                                                                                                                                      |                                   |
| Discussion                                     | 23a    | Provide a general interpretation of the results in the context of other evidence.                                                                                                                                                                                                    | 4                                 |
|                                                | 23b    | Discuss any limitations of the evidence included in the review.                                                                                                                                                                                                                      | 4                                 |
|                                                | 23c    | Discuss any limitations of the review processes used.                                                                                                                                                                                                                                | NA                                |
|                                                | 23d    | Discuss implications of the results for practice, policy, and future research.                                                                                                                                                                                                       | 4                                 |
| <b>OTHER INFORMATION</b>                       |        |                                                                                                                                                                                                                                                                                      |                                   |
| Registration and protocol                      | 24a    | Provide registration information for the review, including register name and registration number, or state that the review was not registered.                                                                                                                                       | 2                                 |
|                                                | 24b    | Indicate where the review protocol can be accessed, or state that a protocol was not prepared.                                                                                                                                                                                       | 2                                 |
|                                                | 24c    | Describe and explain any amendments to information provided at registration or in the protocol.                                                                                                                                                                                      | NA                                |
| Support                                        | 25     | Describe sources of financial or non-financial support for the review, and the role of the funders or sponsors in the review.                                                                                                                                                        | Funding                           |
| Competing interests                            | 26     | Declare any competing interests of review authors.                                                                                                                                                                                                                                   | Conflicts of interest             |
| Availability of data, code and other materials | 27     | Report which of the following are publicly available and where they can be found: template data collection forms; data extracted from included studies; data used for all analyses; analytic code; any other materials used in the review.                                           | NA                                |

## Supplemental 2 – Search strategies

### MEDLINE

*Performed 16.08.2022*

<https://ovidsp.ovid.com/ovidweb.cgi?T=JS&CSC=Y&NEWS=N&PAGE=titles&SEARCHNAME=Pine-antipsychotics+and+schizophrenia+or+psychosis+and+RCT+and+placebo+-+MEDLINE-PubMed&SEARCHTYPE=ps&SEARCHLEVEL=pin&D=ppezv>

### EMBASE

*Performed 16.08.2022*

<https://ovidsp.ovid.com/ovidweb.cgi?T=JS&CSC=Y&NEWS=N&PAGE=titles&SEARCHNAME=Pine-antipsychotics+and+schizophrenia+or+psychosis+and+RCT+and+placebo+-+Embase&SEARCHTYPE=ps&SEARCHLEVEL=pin&D=oemezd>

### Cochrane Central Register of Controlled Trials (CENTRAL)

*Performed 16.08.2022*

<https://www.cochranelibrary.com/advanced-search/search-manager?search=7010441>

### PsycINFO

*Performed 16.08.2022*

<https://ovidsp.ovid.com/ovidweb.cgi?T=JS&CSC=Y&NEWS=N&PAGE=titles&SEARCHNAME=Pine-antipsychotics+and+schizophrenia+or+psychosis+and+RCT+and+placebo+-+PsychInfo&SEARCHTYPE=ps&SEARCHLEVEL=pin&D=psych>

## Supplemental 3 – Study characteristics

*Study characteristics of included studies distributed by drug.*

| SUBLINGUAL ASENAPINE  |                                                                                                                                                                                                                                                                                                                                                                                                                                                                                                                                                                                                                                                                                                                                                                                                                                                                                                                                                                                                                                                |                                                                                                                                                                                                                                                                                                                                                                                                                                                                                                                                                                                                                                                                                                                                                               |                                                                                                                                                                                                                                                                                                                                                                                                                                                                                                                                                                                                                                                                                                                                                                                                                                                                       |                                                                                                                                                                                                                                                                                                                                                                                                                                                                                                                           |
|-----------------------|------------------------------------------------------------------------------------------------------------------------------------------------------------------------------------------------------------------------------------------------------------------------------------------------------------------------------------------------------------------------------------------------------------------------------------------------------------------------------------------------------------------------------------------------------------------------------------------------------------------------------------------------------------------------------------------------------------------------------------------------------------------------------------------------------------------------------------------------------------------------------------------------------------------------------------------------------------------------------------------------------------------------------------------------|---------------------------------------------------------------------------------------------------------------------------------------------------------------------------------------------------------------------------------------------------------------------------------------------------------------------------------------------------------------------------------------------------------------------------------------------------------------------------------------------------------------------------------------------------------------------------------------------------------------------------------------------------------------------------------------------------------------------------------------------------------------|-----------------------------------------------------------------------------------------------------------------------------------------------------------------------------------------------------------------------------------------------------------------------------------------------------------------------------------------------------------------------------------------------------------------------------------------------------------------------------------------------------------------------------------------------------------------------------------------------------------------------------------------------------------------------------------------------------------------------------------------------------------------------------------------------------------------------------------------------------------------------|---------------------------------------------------------------------------------------------------------------------------------------------------------------------------------------------------------------------------------------------------------------------------------------------------------------------------------------------------------------------------------------------------------------------------------------------------------------------------------------------------------------------------|
| Study ID              | Design                                                                                                                                                                                                                                                                                                                                                                                                                                                                                                                                                                                                                                                                                                                                                                                                                                                                                                                                                                                                                                         | Population                                                                                                                                                                                                                                                                                                                                                                                                                                                                                                                                                                                                                                                                                                                                                    | Intervention                                                                                                                                                                                                                                                                                                                                                                                                                                                                                                                                                                                                                                                                                                                                                                                                                                                          | Outcome measure                                                                                                                                                                                                                                                                                                                                                                                                                                                                                                           |
| Potkin et al. 2007[2] | <p>RCT, DB, PLB-controlled 3-arm study</p> <p>Duration: 6 weeks</p> <p>Run-in period:</p> <ul style="list-style-type: none"> <li>- Pre baseline washout: yes (<math>\geq 3</math> days for current antipsychotic medication and <math>\geq 5</math> days for mood stabilizers)</li> <li>- Pre study trial-drug phase: No</li> </ul> <p>Inclusion criteria:</p> <ul style="list-style-type: none"> <li>- DSM-IV: Schizophrenia (disorganized, paranoid, catatonic or undifferentiated)</li> <li>- Acute exacerbation</li> <li>- CGI-S <math>\geq 4</math></li> <li>- PANSS <math>\geq 60</math> and a score of <math>\geq 4</math> on <math>\geq 2</math> of the items: Delusions, conceptual disorganization, hallucinatory behavior, grandiosity, suspiciousness</li> <li>- If received depot neuroleptics <math>\geq 1</math> month between last injection and the first dose of trial medication.</li> </ul> <p>Substance abuse allowed: No<br/>Hospitalized the first 3 weeks</p> <p>Must meet inclusion criteria after washout: NSPEC</p> | <p>Randomized, N= 182</p> <p>Age, mean (range), years:</p> <ul style="list-style-type: none"> <li>- Asenapine: 38 (21-70)</li> <li>- Risperidone: 43 (22-61)</li> <li>- PLB: 42 (22-68)</li> </ul> <p>Sex, male: 72.8%</p> <p>Enriched population: Yes</p> <p>PLB-responders withdrawn: Yes, PANSS at BL required to be <math>\geq 80\%</math> of that of prior visits.</p> <p>Those who were <math>&gt;75\%</math> adherent during the wash out period was randomized.</p> <p>PANSS-total mean at BL:</p> <ul style="list-style-type: none"> <li>- Asenapine: 96.48</li> <li>- Risperidone: 92.18</li> <li>- PLB: 92.43</li> <li>- Total 93.7</li> </ul> <p>Completed the study: Asenapine 46%, Risperidone 42%, PLB 34%</p> <p>LOCF/ITT-population: Yes</p> | <p>Sublingual Asenapine 10mg/d (n=58) vs Oral Risperidone 6 mg/d (n=56) vs PLB (n=60)</p> <p>Administration: B.i.d.</p> <p>Dose titration: 1 mg at day 1, 2 mg at day 2, 3 mg at day, 4 mg at day 4 and 5 mg day 3-42</p> <p>Double-dummy design: Asenapine treated patients also received oral PLB. Risperidone treated patients also received sublingual PLB. PLB treated patients received oral and sublingual PLB.</p> <p>Fixed doses: NSPEC</p> <p>Allowed supplemental medication:</p> <ul style="list-style-type: none"> <li>- For sleep induction: Zolpidem tartrate <math>\leq 10</math> mg/d, Zaleplon <math>\leq 20</math> mg/d or chloral hydrate <math>\leq 3000</math> mg/d.</li> <li>- For agitation: benzodiazepines at daily doses equivalent to Lorazepam <math>\leq 10</math> mg/d.</li> <li>- Anticholinergics for newly emergent EPS.</li> </ul> | <p>Primary:</p> <ul style="list-style-type: none"> <li>- PANSS-total</li> </ul> <p>Secondary:</p> <ul style="list-style-type: none"> <li>- CGI-S</li> <li>- PANSS-positive subscale</li> <li>- PANSS-negative subscale</li> <li>- PANSS general psychopathology</li> </ul> <p>Follow up (days): 7, 14, 21, 28, 35, 42</p> <p>Interrater reliability: Raters required to have <math>\geq 2</math> years of experience in performing clinical evaluations of patients with schizophrenia. No <math>\kappa</math>-value.</p> |

|                          |                                                                                                                                                                                                                                                                                                                                                                                                                                                                                                                                                                                                                                                                                                                                                         |                                                                                                                                                                                                                                                                                                                                                                                                                              |                                                                                                                                                                                                                                                                                                                                                                                                                                                                                                                                                 |                                                                                                                                                                                                                                                                                                                                                                                     |
|--------------------------|---------------------------------------------------------------------------------------------------------------------------------------------------------------------------------------------------------------------------------------------------------------------------------------------------------------------------------------------------------------------------------------------------------------------------------------------------------------------------------------------------------------------------------------------------------------------------------------------------------------------------------------------------------------------------------------------------------------------------------------------------------|------------------------------------------------------------------------------------------------------------------------------------------------------------------------------------------------------------------------------------------------------------------------------------------------------------------------------------------------------------------------------------------------------------------------------|-------------------------------------------------------------------------------------------------------------------------------------------------------------------------------------------------------------------------------------------------------------------------------------------------------------------------------------------------------------------------------------------------------------------------------------------------------------------------------------------------------------------------------------------------|-------------------------------------------------------------------------------------------------------------------------------------------------------------------------------------------------------------------------------------------------------------------------------------------------------------------------------------------------------------------------------------|
| Kane et al. 2010[3]      | <p>RCT, DB, PLB-controlled 4-arm study</p> <p>Duration: 6 weeks</p> <p>Run-in period:</p> <ul style="list-style-type: none"> <li>- Pre baseline washout: Yes (3 days)</li> <li>- Pre study trial-drug phase: No</li> </ul> <p>Inclusion criteria:</p> <ul style="list-style-type: none"> <li>- DSM-IV: Schizophrenia</li> <li>- Acute exacerbation</li> <li>- PANSS <math>\geq 60</math> and score of <math>\geq 4</math> on <math>\geq 2</math> PANSS-Positive subscale items: Delusions, conceptual disorganization, hallucinatory behavior, grandiosity, suspiciousness</li> <li>- CGI-S <math>\geq 4</math></li> </ul> <p>Substance abuse allowed: No<br/>Hospitalized the first 2 weeks</p> <p>Must meet inclusion criteria after washout: Yes</p> | <p>Randomized, N= 458</p> <p>Age, mean range, years: 37-40 across the 4 treatment groups</p> <p>Sex, male: 52-68%</p> <p>Enriched population: No</p> <p>PLB-responders withdrawn: Yes, patient excluded if <math>\geq 20\%</math> decrease in PANSS-total from screening to BL.</p> <p>PANSS-total mean at BL: NSPEC</p> <p>Completed the study: 61% (272)</p> <p>LOCF/ITT-population: Yes</p>                               | <p>Sublingual Asenapine at two dosages (n=214) vs Haloperidol 4 mg/d (n=112) vs PLB (n=122)</p> <p>Administration: B.i.d.</p> <p>Dosage groups,</p> <ul style="list-style-type: none"> <li>- Sublingual Asenapine 10mg/d (n=109)</li> <li>- Sublingual Asenapine 20mg/d (n=105)</li> </ul> <p>Dose titration: NSPEC</p> <p>Fixed doses: Yes</p> <p>Allowed supplemental medication: NSPEC</p>                                                                                                                                                   | <p>Primary:</p> <ul style="list-style-type: none"> <li>- PANSS-total</li> </ul> <p>Secondary:</p> <ul style="list-style-type: none"> <li>- PANSS subscale scores</li> <li>- PANSS Marder factors</li> <li>- CGI-S</li> <li>- CGI-I</li> <li>- CDSS</li> </ul> <p>Follow up (days): 4, 7, 14, 21, 28, 35, 42</p> <p>Interrater reliability: NSPEC. No <math>\kappa</math>-value.</p> |
| Kinoshita et al. 2016[4] | <p>RCT, DB, PLB-controlled 3-arm study</p> <p>Duration: 6 weeks</p> <p>Run-in period:</p> <ul style="list-style-type: none"> <li>- Pre baseline washout: Yes (3-7 days)</li> <li>- Pre study trial-drug phase: No</li> </ul> <p>Inclusion criteria:</p> <ul style="list-style-type: none"> <li>- DSM-IV: Schizophrenia (paranoid, disorganized, catatonic, undifferentiated)</li> <li>- Acute exacerbation <math>\leq 2</math> months duration</li> <li>- PANSS <math>\geq 60</math> and score of <math>\geq 4</math> on <math>\geq 2</math> PANSS-Positive subscale items: Delusions, conceptual disorganization, hallucinatory behavior, grandiosity, suspiciousness</li> <li>- CGI <math>\geq 4</math></li> </ul>                                    | <p>Randomized, N= 532</p> <p>Age, mean (SD), years: 41.42 (11.45)</p> <p>Sex, male: 48.1%</p> <p>Enriched population: Yes</p> <p>PLB-responders withdrawn: Yes, patient excluded if <math>\geq 20\%</math> decrease in PANSS-total from screening to BL</p> <p>PANSS-total mean (SD) at BL:</p> <ul style="list-style-type: none"> <li>- Asenapine 10 mg: 94.15 (17.97)</li> <li>- Asenapine 20 mg: 92.74 (17.34)</li> </ul> | <p>Sublingual Asenapine at two dosages (n=351) vs PLB (n=174)</p> <p>Administration: B.i.d.</p> <p>Dosage groups,</p> <ul style="list-style-type: none"> <li>- Sublingual Asenapine 10 mg/d (n=173)</li> <li>- Sublingual Asenapine 20 mg/d (n=178)</li> </ul> <p>Dose titration: NSPEC</p> <p>Fixed doses: Yes</p> <p>Allowed supplemental medication:</p> <ul style="list-style-type: none"> <li>- Agitation and anxiety: Short-acting benzodiazepines</li> <li>- Lorazepam</li> <li>- EPS medication if EPS worsened or appeared.</li> </ul> | <p>Primary:</p> <ul style="list-style-type: none"> <li>- PANSS-total</li> </ul> <p>Secondary:</p> <ul style="list-style-type: none"> <li>- CGI</li> </ul> <p>Follow up (days): 4, 7, 14, 21, 28, 35, 42</p> <p>Interrater reliability: Performed by an investigator or trained rater. Each patient was rated by the same rater for assessments. No <math>\kappa</math>-value.</p>   |



|                          |                                                                                                                                                                                                                                                                                                                                                                                                                                                                                                                                                                                                                                                                                                                               |                                                                                                                                                                                                                                                                                                                                                                                                                                                                                                                                                                                 |                                                                                                                                                                                                                                                                                                                                                                                                                                         |                                                                                                                                                                                                                                                             |
|--------------------------|-------------------------------------------------------------------------------------------------------------------------------------------------------------------------------------------------------------------------------------------------------------------------------------------------------------------------------------------------------------------------------------------------------------------------------------------------------------------------------------------------------------------------------------------------------------------------------------------------------------------------------------------------------------------------------------------------------------------------------|---------------------------------------------------------------------------------------------------------------------------------------------------------------------------------------------------------------------------------------------------------------------------------------------------------------------------------------------------------------------------------------------------------------------------------------------------------------------------------------------------------------------------------------------------------------------------------|-----------------------------------------------------------------------------------------------------------------------------------------------------------------------------------------------------------------------------------------------------------------------------------------------------------------------------------------------------------------------------------------------------------------------------------------|-------------------------------------------------------------------------------------------------------------------------------------------------------------------------------------------------------------------------------------------------------------|
|                          | <ul style="list-style-type: none"> <li>- If received depot neuroleptics &gt;3 month must have occurred between last injection and randomization.</li> </ul> <p>Substance abuse allowed: No<br/>Hospitalized at least the first 3 weeks</p> <p>Must meet inclusion criteria after washout: Yes</p>                                                                                                                                                                                                                                                                                                                                                                                                                             | <ul style="list-style-type: none"> <li>- PLB: 94.51 (17.26)</li> <li>- Total: 93.79 (17.51)</li> </ul> <p>Completed the study: 57.2% (303)</p> <p>LOCF/ITT-population: Yes</p>                                                                                                                                                                                                                                                                                                                                                                                                  |                                                                                                                                                                                                                                                                                                                                                                                                                                         |                                                                                                                                                                                                                                                             |
| Landbloom et al. 2017[5] | <p>RCT, DB, PLB-controlled<br/>4-arm study</p> <p>Duration: 6 weeks</p> <p>Run-in period:</p> <ul style="list-style-type: none"> <li>- Pre baseline washout: NSPEC</li> <li>- Pre study trial-drug phase: No</li> </ul> <p>Inclusion criteria:</p> <ul style="list-style-type: none"> <li>- DSM-IV: Schizophrenia (paranoid, disorganized, undifferentiated type)</li> <li>- Acute exacerbation <math>\leq</math> 8 weeks</li> <li>- PANSS <math>\geq</math> 70 and score of <math>\geq</math>4 on <math>\geq</math>2 PANSS-Positive subscale items</li> <li>- CGI <math>\geq</math>4</li> </ul> <p>Substance abuse allowed: No<br/>Hospitalized at least 3 weeks.</p> <p>Must meet inclusion criteria after washout: Yes</p> | <p>Randomized, N= 360</p> <p>Age, mean, years: 40.6</p> <p>Sex, male: 58.5%</p> <p>Enriched population: Yes</p> <p>PLB-responders withdrawn:<br/>Yes, patient excluded if <math>\geq</math> 20% decrease in PANSS-total from screening to BL.</p> <p>PANSS-total mean (SD) at BL:</p> <ul style="list-style-type: none"> <li>- Asenapine 5 mg: 93.3 (11.10)</li> <li>- Asenapine 10 mg: 95.8 (13.77)</li> <li>- Olanzapine: 92.7 (10.47)</li> <li>- PLB: 93.4 (11.16)</li> <li>- Total: 94.1 (11.97)</li> </ul> <p>Completed the study: 60%</p> <p>LOCF/ITT-population: Yes</p> | <p>Sublingual Asenapine in two dosages (n=207) vs Olanzapine 15 mg (n=45) vs. PLB (n=99)</p> <p>Administration: Once daily</p> <p>Dosage groups,</p> <ul style="list-style-type: none"> <li>- Sublingual Asenapine 5 mg/d (n=96)</li> <li>- Sublingual Asenapine 10 mg/d (n=111)</li> </ul> <p>Dose titration: Olanzapine group received 10mg the first week.</p> <p>Fixed doses: Yes</p> <p>Allowed supplemental medication: NSPEC</p> | <p>Primary:</p> <ul style="list-style-type: none"> <li>- PANSS-total</li> </ul> <p>Secondary:</p> <ul style="list-style-type: none"> <li>- CGI-S</li> </ul> <p>Follow up (days): 42</p> <p>Interrater reliability: NSPEC. No <math>\kappa</math>-value.</p> |

| TRANSDERMAL ASENAPINE   |                                                                                                                                                                                                                                                                                                                                                                                                                                                                                                                                                                                                                                                                                                                                                                                                            |                                                                                                                                                                                                                                                                                                                                                                                                                                                                                                                                      |                                                                                                                                                                                                                                                                                                                         |                                                                                                                                                                                                                                                                                                 |
|-------------------------|------------------------------------------------------------------------------------------------------------------------------------------------------------------------------------------------------------------------------------------------------------------------------------------------------------------------------------------------------------------------------------------------------------------------------------------------------------------------------------------------------------------------------------------------------------------------------------------------------------------------------------------------------------------------------------------------------------------------------------------------------------------------------------------------------------|--------------------------------------------------------------------------------------------------------------------------------------------------------------------------------------------------------------------------------------------------------------------------------------------------------------------------------------------------------------------------------------------------------------------------------------------------------------------------------------------------------------------------------------|-------------------------------------------------------------------------------------------------------------------------------------------------------------------------------------------------------------------------------------------------------------------------------------------------------------------------|-------------------------------------------------------------------------------------------------------------------------------------------------------------------------------------------------------------------------------------------------------------------------------------------------|
| Study ID                | Design                                                                                                                                                                                                                                                                                                                                                                                                                                                                                                                                                                                                                                                                                                                                                                                                     | Population                                                                                                                                                                                                                                                                                                                                                                                                                                                                                                                           | Intervention                                                                                                                                                                                                                                                                                                            | Outcome measure                                                                                                                                                                                                                                                                                 |
| Citrome et al. 2020[6]  | <p>RCT, DB, PLB-controlled<br/>3- arm study</p> <p>Duration: 6 weeks</p> <p>Run-in period:</p> <ul style="list-style-type: none"> <li>- Pre baseline washout: Yes (3-14 days)</li> <li>- Pre study trial-drug phase: No</li> </ul> <p>Inclusion criteria:</p> <ul style="list-style-type: none"> <li>- DSM-IV: Schizophrenia</li> <li>- Acute exacerbation</li> <li>- PANSS <math>\geq 80</math> and a score of <math>\geq 4</math> in <math>\geq 2</math> of the items: Delusions, hallucinatory behavior, conceptual disorganization, unusual thought content</li> <li>- CGI-S <math>\geq 4</math></li> <li>- Disease duration: &gt; 6 months</li> </ul> <p>Substance abuse allowed: No</p> <p>Hospitalized for during the treatment period</p> <p>Must meet inclusion criteria after washout: NSPEC</p> | <p>Randomized, N= 617</p> <p>Age, mean, years: 42,0</p> <p>Sex, male: 60,6%</p> <p>Enriched population: Yes</p> <p>PLB-responders withdrawn: Yes, patient excluded if <math>\geq 20\%</math> decrease in PANSS-total from screening to BL.</p> <p>PANSS-total mean at BL:</p> <ul style="list-style-type: none"> <li>- HP-3070 3.8mg/24hours: 97.0 (9.74)</li> <li>- HP-3070 7.6mg/24hours: 95.6 (8.68)</li> <li>- PLB: 97.3 (10.05)</li> </ul> <p>Completed the study: 79%</p> <p>LOCF/ITT-population: No, solely MMRM was used</p> | <p>HP-3070 at two dosages (n=411) vs PLB (n=206)</p> <p>Administration: Once daily (evening)</p> <p>Dosage groups,</p> <ul style="list-style-type: none"> <li>- HP-3070 3.8mg/24hours (n=205)</li> <li>- HP-3070 7.6mg/24hours (n=206)</li> </ul> <p>Fixed doses: Yes</p> <p>Allowed supplemental medication: NSPEC</p> | <p>Primary:</p> <ul style="list-style-type: none"> <li>- PANSS-total</li> </ul> <p>Secondary:</p> <ul style="list-style-type: none"> <li>- CGI-S</li> <li>- CGI-I</li> </ul> <p>Follow up (days): 7, 14, 21, 28, 35, 42</p> <p>Interrater reliability: NSPEC. No <math>\kappa</math>-value.</p> |
| ORAL OLANZAPINE         |                                                                                                                                                                                                                                                                                                                                                                                                                                                                                                                                                                                                                                                                                                                                                                                                            |                                                                                                                                                                                                                                                                                                                                                                                                                                                                                                                                      |                                                                                                                                                                                                                                                                                                                         |                                                                                                                                                                                                                                                                                                 |
| Study ID                | Design                                                                                                                                                                                                                                                                                                                                                                                                                                                                                                                                                                                                                                                                                                                                                                                                     | Population                                                                                                                                                                                                                                                                                                                                                                                                                                                                                                                           | Intervention                                                                                                                                                                                                                                                                                                            | Outcome measure                                                                                                                                                                                                                                                                                 |
| Lecrubier et al 2006[7] | <p>RCT, DB, PLB-controlled<br/>4-arm study</p> <p>Duration: 6 months</p> <ul style="list-style-type: none"> <li>- Optional DB extension period for responders to the 6 months treatment period.</li> </ul>                                                                                                                                                                                                                                                                                                                                                                                                                                                                                                                                                                                                 | <p>Randomized, N= 245</p> <p>Age, mean (SD), years:</p> <ul style="list-style-type: none"> <li>- Olanzapine 5 mg: 38.1 (11.1)</li> <li>- Olanzapine 20 mg: 36.4 (10.4)</li> <li>- Amisulpride: 37.8 (11.6)</li> <li>- PLB: 38.2 (9.0)</li> </ul>                                                                                                                                                                                                                                                                                     | <p>Olanzapine in two dosages (n=140) vs Amisulpride 150 mg (n=70) vs PLB (n=34)</p> <p>Administration: Once daily (evening)</p> <p>Dosage groups,</p> <ul style="list-style-type: none"> <li>- Olanzapine 5 mg (n=70)</li> </ul>                                                                                        | <p>Primary:</p> <ul style="list-style-type: none"> <li>- SANS</li> </ul> <p>Secondary:</p> <ul style="list-style-type: none"> <li>- PANSS-total</li> <li>- PDS</li> <li>- BPRS</li> </ul>                                                                                                       |

|                        |                                                                                                                                                                                                                                                                                                                                                                                                                                                                                                                                                                                                                                                                                                                                                              |                                                                                                                                                                                                                                                                                                                                                                                                                                                                                                                                                                               |                                                                                                                                                                                                                                                                                                                                                                                                                                                                                      |                                                                                                                                                                                                                                                                                                                               |
|------------------------|--------------------------------------------------------------------------------------------------------------------------------------------------------------------------------------------------------------------------------------------------------------------------------------------------------------------------------------------------------------------------------------------------------------------------------------------------------------------------------------------------------------------------------------------------------------------------------------------------------------------------------------------------------------------------------------------------------------------------------------------------------------|-------------------------------------------------------------------------------------------------------------------------------------------------------------------------------------------------------------------------------------------------------------------------------------------------------------------------------------------------------------------------------------------------------------------------------------------------------------------------------------------------------------------------------------------------------------------------------|--------------------------------------------------------------------------------------------------------------------------------------------------------------------------------------------------------------------------------------------------------------------------------------------------------------------------------------------------------------------------------------------------------------------------------------------------------------------------------------|-------------------------------------------------------------------------------------------------------------------------------------------------------------------------------------------------------------------------------------------------------------------------------------------------------------------------------|
|                        | <p>Run-in period:</p> <ul style="list-style-type: none"> <li>- Pre baseline washout: Yes (2-9 days)</li> <li>- Pre study trial-drug phase: No</li> </ul> <p>Inclusion criteria:</p> <ul style="list-style-type: none"> <li>- DSM-IV: Schizophrenia, residual type, disorganized or catatonic</li> <li>- Disease duration: At least 1 year</li> <li>- SANS <math>\geq 10</math></li> <li>- PANSS <math>\leq 4</math> on the items: hallucinations and delusions</li> </ul> <p>Substance abuse allowed: No<br/>Hospitalization: 60.5% at inclusion</p> <p>Must meet inclusion criteria after washout: Yes</p>                                                                                                                                                  | <p>Sex, male: 68%</p> <p>Enriched population: yes</p> <p>PLB-responders withdrawn: NSPEC</p> <p>PANSS-total mean at BL:</p> <ul style="list-style-type: none"> <li>- Olanzapine 5 mg: 67.5 (17.3)</li> <li>- Olanzapine 20 mg: 65.4 (15.4)</li> <li>- Amisulpride: 67.4 (14.8)</li> <li>- PLB: 67.9 (14.4)</li> </ul> <p>Completed the study: 41.3%</p> <p>LOCF/ITT-population: Yes</p>                                                                                                                                                                                       | <ul style="list-style-type: none"> <li>- Olanzapine 20 mg (n=70)</li> </ul> <p>Dose titration: NSPEC</p> <p>Fixed doses: Yes</p> <p>Allowed supplemental medication:</p> <ul style="list-style-type: none"> <li>- Benzodiazepines: Chronic users, dose up to 60 mg of diazepam equivalent. Non-chronic users could be treated with diazepam 60 mg/d for a cumulative time administration of 60 days.</li> <li>- Benzotropine or biperiden for EPS at a total of 4 mg/day.</li> </ul> | <ul style="list-style-type: none"> <li>- CGI</li> <li>- PGI</li> </ul> <p>Follow up (days): 7, 14, 21, 28, 35, 42 and then every 4 weeks</p> <p>Interrater reliability: Investigators trained by videotapes. Rating should be within 1.5 SD otherwise proposed further training or withdraw from the study.</p>               |
| Meltzer et al. 2011[8] | <p>RCT, DB, PLB-controlled 4-arm study</p> <p>Duration: 6 weeks</p> <p>Run-in period:</p> <ul style="list-style-type: none"> <li>- Pre baseline washout: No</li> <li>- Pre study trial-drug phase: No</li> </ul> <p>Inclusion criteria:</p> <ul style="list-style-type: none"> <li>- DSM-IV: Schizophrenia</li> <li>- Hospitalized <math>\leq 2</math> weeks for an acute exacerbation</li> <li>- CGI-S <math>\geq 4</math></li> <li>- PANSS <math>\geq 80</math> and a score of <math>\geq 4</math> on the items: Delusions, hallucinatory behavior and conceptual disorganization, unusual thought content, suspiciousness</li> <li>- Disease duration: At least 1 year</li> </ul> <p>Substance abuse allowed: NSPEC<br/>Hospitalized at least 21 days</p> | <p>Randomized, N= 478</p> <p>Age, mean (SD), years:</p> <ul style="list-style-type: none"> <li>- Lurasidone 40 mg: 37.7 (11.0)</li> <li>- Lurasidone 120 mg: 37.9 (11.2)</li> <li>- Olanzapine: 38.3 (10.2)</li> <li>- PLB: 37.0 (11.3)</li> </ul> <p>Sex, male: 78%</p> <p>Enriched population: No</p> <p>PLB-responders withdrawn: NSPEC</p> <p>PANSS-total mean (SD) at BL:</p> <ul style="list-style-type: none"> <li>- Lurasidone 40 mg: 96.6 (10.7)</li> <li>- Lurasidone 120 mg: 97.9 (11.3)</li> <li>- Olanzapine: 96.3 (12.2)</li> <li>- PLB: 95.8 (10.8)</li> </ul> | <p>Lurasidone at two dosages (n=236) vs Olanzapine 15 mg (n=121) vs PLB (n=114)</p> <p>Administration: Once daily (morning)</p> <p>Dose titration: The Lurasidone group received the target dose at treatment start. The olanzapine group received 10mg/d on day 1-7 and 15mg/d thereafter.</p> <p>Fixed doses: Yes</p> <p>Allowed supplemental medication: Limited use of benzodiazepines for anxiety, agitation or insomnia.</p>                                                   | <p>Primary:</p> <ul style="list-style-type: none"> <li>- PANSS-total</li> </ul> <p>Secondary:</p> <ul style="list-style-type: none"> <li>- CGI-S</li> <li>- MADRS</li> <li>- PANSS subscales</li> </ul> <p>Follow up (days): 4, 7, 14, 21, 28, 35, 42</p> <p>Interrater reliability: NSPEC. No <math>\kappa</math>-value.</p> |

|                             |                                                                                                                                                                                                                                                                                                                                                                                                                                                                                                                                                                      |                                                                                                                                                                                                                                                                                                                                                                                                                                                                                                                                                                                                                                                                                                                                                                                                                                                                                                                                                                                                                              |                                                                                                                                                                                                                                                                                                                                                                                                                                                                                                                                                                                                                                                                                                                                                                                                                                                                                                                                                                                                                                                        |                                                                                                                                                                                                                                                                                                                                                                                                                    |
|-----------------------------|----------------------------------------------------------------------------------------------------------------------------------------------------------------------------------------------------------------------------------------------------------------------------------------------------------------------------------------------------------------------------------------------------------------------------------------------------------------------------------------------------------------------------------------------------------------------|------------------------------------------------------------------------------------------------------------------------------------------------------------------------------------------------------------------------------------------------------------------------------------------------------------------------------------------------------------------------------------------------------------------------------------------------------------------------------------------------------------------------------------------------------------------------------------------------------------------------------------------------------------------------------------------------------------------------------------------------------------------------------------------------------------------------------------------------------------------------------------------------------------------------------------------------------------------------------------------------------------------------------|--------------------------------------------------------------------------------------------------------------------------------------------------------------------------------------------------------------------------------------------------------------------------------------------------------------------------------------------------------------------------------------------------------------------------------------------------------------------------------------------------------------------------------------------------------------------------------------------------------------------------------------------------------------------------------------------------------------------------------------------------------------------------------------------------------------------------------------------------------------------------------------------------------------------------------------------------------------------------------------------------------------------------------------------------------|--------------------------------------------------------------------------------------------------------------------------------------------------------------------------------------------------------------------------------------------------------------------------------------------------------------------------------------------------------------------------------------------------------------------|
|                             | Must meet inclusion criteria after washout: Yes                                                                                                                                                                                                                                                                                                                                                                                                                                                                                                                      | Completed the study: 62.3% (298)<br><br>LOCF/ITT-population: Yes                                                                                                                                                                                                                                                                                                                                                                                                                                                                                                                                                                                                                                                                                                                                                                                                                                                                                                                                                             |                                                                                                                                                                                                                                                                                                                                                                                                                                                                                                                                                                                                                                                                                                                                                                                                                                                                                                                                                                                                                                                        |                                                                                                                                                                                                                                                                                                                                                                                                                    |
| Beasley et al.<br>1996_1[9] | <p>RCT, DB, PLB-controlled<br/>5-arm study</p> <p>Duration: 6 weeks</p> <p>Run-in period:</p> <ul style="list-style-type: none"> <li>- Pre baseline washout: Yes (4-7 days)</li> <li>- Pre study trial-drug phase: No</li> </ul> <p>Inclusion criteria:</p> <ul style="list-style-type: none"> <li>- DSM-III: Schizophrenia</li> <li>- Acute exacerbation</li> <li>- BPRS <math>\geq</math> 24</li> </ul> <p>Substance abuse allowed: No</p> <p>Hospitalized for washout and first 2 weeks of treatment</p> <p>Must meet inclusion criteria after washout: NSPEC</p> | <p>Randomized, N= 335</p> <p>Age, mean (SD), years:</p> <ul style="list-style-type: none"> <li>- Olanzapine-Low: 36 (10)</li> <li>- Olanzapine-medium: 37 (10)</li> <li>- Olanzapine-high: 36 (10)</li> <li>- Haloperidol: 36 (9)</li> <li>- PLB: 35 (8)</li> </ul> <p>Sex, male: 87,8%</p> <p>Enriched population: No</p> <p>PLB-responders withdrawn:<br/>Yes, if <math>\geq</math> 25% decrease in BPRS-score or BPRS-score decreased to &lt;24 during the placebo lead-in phase.</p> <p>BPRS-total mean (SD) at BL:</p> <ul style="list-style-type: none"> <li>- Olanzapine-Low: 41.2 (11.7)</li> <li>- Olanzapine-medium: 42.8 (10.0)</li> <li>- Olanzapine-high: 42.6 (10.9)</li> <li>- Haloperidol: 41.8 (11.4)</li> <li>- PLB: 39.7 (10.5)</li> </ul> <p>Completed the study (%):</p> <ul style="list-style-type: none"> <li>- Olanzapine-Low: 41.5</li> <li>- Olanzapine-medium: 40.6</li> <li>- Olanzapine-high: 49.3</li> <li>- Haloperidol: 43.5</li> <li>- PLB: 32.4</li> </ul> <p>LOCF/ITT-population: Yes</p> | <p>Olanzapine at low, medium and high dosages (n=190) vs Haloperidol (n=68) vs PLB (n=62)</p> <p>Administration: Once daily</p> <p>Dosage groups,</p> <ul style="list-style-type: none"> <li>- Olanzapine 2.5, 5 or 7.5 mg, mean dose: 6.6 (1.4) mg/d (n=63)</li> <li>- Olanzapine 7.5, 10, 12.5 mg, mean dose: 11.6 (1.5) mg/d (n=62)</li> <li>- Olanzapine 12.5, 15, 17.5 mg, mean dose: 16.3 (1.6) mg/d (n=65)</li> <li>- Haloperidol 10, 15, 20 mg, mean dose: 16.4 (4.0) mg/d (n=68)</li> </ul> <p>Dose titration: The treatment was initiated in the middle dose and could be adjusted if clinically indicated. Upward adjustment could occur after day 4 and at any scheduled visit. Downward adjustment could occur at any time.</p> <p>Fixed doses: No</p> <p>Allowed supplemental medication:</p> <ul style="list-style-type: none"> <li>- Lorazepam <math>\leq</math> 10 mg/day during the leading period and <math>\leq</math> 21 days of the DB treatment period.</li> <li>- Benzotropine mesylate <math>\leq</math> 6 mg/day.</li> </ul> | <p>Primary:</p> <ul style="list-style-type: none"> <li>- BPRS-Anchored, 18-items, score 0-6 at each item</li> <li>- SANS</li> </ul> <p>Secondary:</p> <ul style="list-style-type: none"> <li>- CGI-S</li> </ul> <p>Follow up (days): 3, 7, 14, 21, 28, 35, 42</p> <p>Interrater reliability:<br/>Investigators received training on administration and scoring of BPRS and SANS. No <math>\kappa</math>-value.</p> |

|                           |                                                                                                                                                                                                                                                                                                                                                                                                                                                                                                                                                                                  |                                                                                                                                                                                                                                                                                                                                                                                                                                                                                                                      |                                                                                                                                                                                                                                                                                                                                                                                                                                                                                                                                                                                                                                                                                                          |                                                                                                                                                                                                                                                                                                   |
|---------------------------|----------------------------------------------------------------------------------------------------------------------------------------------------------------------------------------------------------------------------------------------------------------------------------------------------------------------------------------------------------------------------------------------------------------------------------------------------------------------------------------------------------------------------------------------------------------------------------|----------------------------------------------------------------------------------------------------------------------------------------------------------------------------------------------------------------------------------------------------------------------------------------------------------------------------------------------------------------------------------------------------------------------------------------------------------------------------------------------------------------------|----------------------------------------------------------------------------------------------------------------------------------------------------------------------------------------------------------------------------------------------------------------------------------------------------------------------------------------------------------------------------------------------------------------------------------------------------------------------------------------------------------------------------------------------------------------------------------------------------------------------------------------------------------------------------------------------------------|---------------------------------------------------------------------------------------------------------------------------------------------------------------------------------------------------------------------------------------------------------------------------------------------------|
| Beasley et al. 1996_2[10] | <p>RCT, DB, PLB-controlled 3-arm study</p> <p>Duration: 6 weeks</p> <p>Run-in period:</p> <ul style="list-style-type: none"> <li>- Pre baseline washout: Yes (4-7 days)</li> <li>- Pre study trial-drug phase: No</li> </ul> <p>Inclusion criteria:</p> <ul style="list-style-type: none"> <li>- DSM-III: Schizophrenia</li> <li>- BPRS <math>\geq 24</math></li> <li>- CGI-S <math>\geq 4</math></li> </ul> <p>Substance abuse allowed: No</p> <p>Hospitalized during wash out and the first 2 weeks of DB-treatment</p> <p>Must meet inclusion criteria after washout: Yes</p> | <p>Randomized, N= 152</p> <p>Age, mean, years: 38</p> <p>Sex, male: 72.4%</p> <p>Enriched population: No</p> <p>PLB-responders withdrawn: Yes, if BPRS improved by <math>\geq 25\%</math> or to a score <math>&lt;24</math> between screening and BL.</p> <p>BPRS-total mean (SD) at BL:</p> <ul style="list-style-type: none"> <li>- Olanzapine 1 mg/d: 39.6 (11.1)</li> <li>- Olanzapine 10 mg/d: 37.4 (8.5)</li> <li>- PLB: 36.8 (6.9)</li> </ul> <p>Completed the study: 27%</p> <p>LOCF/ITT-population: yes</p> | <p>Olanzapine at two dosages (n=100) vs PLB (n=49)</p> <p>Administration: Once daily</p> <p>Dosage groups,</p> <ul style="list-style-type: none"> <li>- Olanzapine 1 mg/d (n=51)</li> <li>- Olanzapine 10 mg/d (n=49)</li> </ul> <p>Dose titration: No</p> <p>Fixed doses: Yes</p> <p>Allowed supplemental medication:</p> <ul style="list-style-type: none"> <li>- Lorazepam <math>\leq 10</math>mg/d during lead-in period and maximum 21 days during DB treatment</li> <li>- Benztropine mesylate <math>\leq 6</math>mg/d</li> </ul>                                                                                                                                                                  | <p>Primary:</p> <ul style="list-style-type: none"> <li>- PANSS-total</li> <li>- BPRS</li> <li>- PGI</li> </ul> <p>Follow up days: 7, 14, 21, 28, 35, 42</p> <p>Interrater reliability: Raters were trained by videotaped interviews. No <math>\kappa</math>-value.</p>                            |
| Corrigan et al. 2004[11]  | <p>RCT, DB, PLB-controlled 5-arm study</p> <p>Duration: 6 weeks</p> <p>Run-in period:</p> <ul style="list-style-type: none"> <li>- Pre baseline washout: Yes (3-7 days)</li> <li>- Pre study trial-drug phase: No</li> </ul> <p>Inclusion criteria:</p> <ul style="list-style-type: none"> <li>- DSM-IV: Schizophrenia (disorganized, catatonic, paranoid, residual, undifferentiated)</li> <li>- PANSS <math>\geq 60</math></li> </ul> <p>Substance abuse allowed: No</p> <p>Hospitalized 4-7 weeks</p>                                                                         | <p>Randomized, N= 467</p> <p>Age, mean (range), years:</p> <ul style="list-style-type: none"> <li>- Olanzapine: 36.8 (19-61)</li> <li>- PLB: 37.2 (19-59)</li> </ul> <p>Sex, male: 65.7%</p> <p>Enriched population: No</p> <p>PLB-responders withdrawn: NSPEC</p> <p>PANSS-total mean at BL:</p> <ul style="list-style-type: none"> <li>- Olanzapine: 24.0</li> <li>- PLB: 23.8</li> </ul>                                                                                                                          | <p>Sonepiprazol at three dosages (n=277) vs Olanzapine 15 mg (n=93) vs PLB (n=85)</p> <p>Administration: Once daily (morning)</p> <p>Fixed doses: Yes</p> <p>Allowed supplemental medication:</p> <ul style="list-style-type: none"> <li>- Sleep difficulties: Chloral hydrate <math>\leq 2</math>mg/d.</li> <li>- EPS: anticholinergics.</li> <li>- Acute dystonic symptoms: oral or parenteral benztropine mesylate 1-4 mg, oral benzhexol hydrochloride 1-15 mg/d or oral diphenhydramine 60-200 mg/d.</li> <li>- Sedation: lorazepam <math>\leq 6</math>mg/d, zolpidem <math>\leq 10</math>mg/d or flunitrazepam <math>\leq 2</math> mg/d only if Chloral hydrate was ineffective and not</li> </ul> | <p>Primary:</p> <ul style="list-style-type: none"> <li>- PANSS-total</li> </ul> <p>Secondary:</p> <ul style="list-style-type: none"> <li>- BPRS</li> <li>- CGI-S</li> </ul> <p>Follow up (days): 0, 7, 14, 21, 28, 35, 42</p> <p>Interrater reliability: NSPEC. No <math>\kappa</math>-value.</p> |

|                         |                                                                                                                                                                                                                                                                                                                                                                                                                                                                                                                                                                                     |                                                                                                                                                                                                                                                                                                                                                                                                                                                        |                                                                                                                                                                                                                                                                                                                                                                                                                                              |                                                                                                                                                                                                                                                                                              |
|-------------------------|-------------------------------------------------------------------------------------------------------------------------------------------------------------------------------------------------------------------------------------------------------------------------------------------------------------------------------------------------------------------------------------------------------------------------------------------------------------------------------------------------------------------------------------------------------------------------------------|--------------------------------------------------------------------------------------------------------------------------------------------------------------------------------------------------------------------------------------------------------------------------------------------------------------------------------------------------------------------------------------------------------------------------------------------------------|----------------------------------------------------------------------------------------------------------------------------------------------------------------------------------------------------------------------------------------------------------------------------------------------------------------------------------------------------------------------------------------------------------------------------------------------|----------------------------------------------------------------------------------------------------------------------------------------------------------------------------------------------------------------------------------------------------------------------------------------------|
|                         | Must meet inclusion criteria after washout: Yes                                                                                                                                                                                                                                                                                                                                                                                                                                                                                                                                     | Completed the study: 71.7%<br><br>LOCF/ITT-population: Yes                                                                                                                                                                                                                                                                                                                                                                                             | administrated within 8 hours of an efficacy assessment.                                                                                                                                                                                                                                                                                                                                                                                      |                                                                                                                                                                                                                                                                                              |
| Marder et al. 2007[12]  | <p>RCT, DB, PLB-controlled<br/>4- arm study</p> <p>Duration: 6 weeks</p> <p>Run-in period:</p> <ul style="list-style-type: none"> <li>- Pre baseline washout: Yes (3 days)</li> <li>- Pre study trial-drug phase: No</li> </ul> <p>Inclusion criteria:</p> <ul style="list-style-type: none"> <li>- DSM-IV: Schizophrenia</li> <li>- Acute exacerbation</li> <li>- PANSS 70-120</li> <li>- Disease duration: At least 1 year</li> </ul> <p>Substance abuse allowed: No</p> <p>Hospitalized for <math>\geq 2</math> weeks</p> <p>Must meet inclusion criteria after washout: Yes</p> | <p>Randomized, N= 444</p> <p>Age, mean, years: 41.6</p> <p>Sex, male: 74%</p> <p>Enriched population: Yes</p> <p>PLB-responders withdrawn: NSPEC</p> <p>PANSS-total mean at BL:</p> <ul style="list-style-type: none"> <li>- Paliperidone ER 6 mg: 92.3 (12.0)</li> <li>- Paliperidone ER 12 mg: 94.1 (11.4)</li> <li>- Olanzapine: 94.9 (12.4)</li> <li>- PLB: 93.6 (11.7)</li> </ul> <p>Completed the study: 43%</p> <p>LOCF/ITT-population: Yes</p> | <p>Paliperidone ER at two dosages (n=221) vs Olanzapine 10 mg (n=105) vs PLB (n=105)</p> <p>Administration: Once daily</p> <p>Fixed doses: Yes</p> <p>Allowed supplemental medication:</p> <ul style="list-style-type: none"> <li>- Benzodiazepines at predefined doses for the treatment of agitation, anxiety or sleep difficulties.</li> <li>- Antidepressants, for patients on a stable dosage for 3 months before the study.</li> </ul> | <p>Primary:</p> <ul style="list-style-type: none"> <li>- PANSS-total</li> </ul> <p>Secondary:</p> <ul style="list-style-type: none"> <li>- CGI</li> </ul> <p>Follow up (days): 4, 8, 15, 22, 29, 36, 43</p> <p>Interrater reliability: NSPEC. No <math>\kappa</math>-value.</p>              |
| Schmidt et al. 2012[13] | <p>RCT, DB, PLB-controlled<br/>5-arm study</p> <p>Duration: 12 weeks</p> <ul style="list-style-type: none"> <li>- From week 7-12 the PLB-group converted to Olanzapine by ethical reasons</li> </ul> <p>Run-in period:</p> <ul style="list-style-type: none"> <li>- Pre baseline washout: No</li> <li>- Pre study trial-drug phase: No</li> </ul> <p>Inclusion criteria:</p>                                                                                                                                                                                                        | <p>Randomized, N= 498</p> <p>Age, mean (SD), years: 39.4 (10.91)</p> <p>Sex, male: 57%</p> <p>Enriched population: Yes</p> <p>PLB-responders withdrawn: Not relevant</p> <p>PANSS-total mean (SD) at BL:</p>                                                                                                                                                                                                                                           | <p>JNJ37822681 at three dosages (n=300) vs Olanzapine 15 mg (n=93) vs PLB (n=99)</p> <p>Administration: Once daily (evening)</p> <p>Fixed doses: Yes</p> <p>Allowed supplemental medication:</p> <ul style="list-style-type: none"> <li>- Anti-parkinsonian medication could be reinstated if the patient experienced worsened EPS.</li> </ul>                                                                                               | <p>Primary:</p> <ul style="list-style-type: none"> <li>- PANSS-total</li> </ul> <p>Secondary:</p> <ul style="list-style-type: none"> <li>- PANSS Marder factors</li> <li>- CGI-S</li> </ul> <p>Follow up (days): 3, 8, 15 and then weekly until day 57. Then bi-weekly until last visit.</p> |

|                                 |                                                                                                                                                                                                                                                                                                                                                                                                                                                                                                                                                                                                                                                                                                                                                                                                                                                                                                              |                                                                                                                                                                                                                                                                                                                                                                                                                                                                        |                                                                                                                                                                                                                                                                                                                                                                                                                                                                                                                                 |                                                                                                                                                                                                                                                                                                                                                                                                                                                                                  |
|---------------------------------|--------------------------------------------------------------------------------------------------------------------------------------------------------------------------------------------------------------------------------------------------------------------------------------------------------------------------------------------------------------------------------------------------------------------------------------------------------------------------------------------------------------------------------------------------------------------------------------------------------------------------------------------------------------------------------------------------------------------------------------------------------------------------------------------------------------------------------------------------------------------------------------------------------------|------------------------------------------------------------------------------------------------------------------------------------------------------------------------------------------------------------------------------------------------------------------------------------------------------------------------------------------------------------------------------------------------------------------------------------------------------------------------|---------------------------------------------------------------------------------------------------------------------------------------------------------------------------------------------------------------------------------------------------------------------------------------------------------------------------------------------------------------------------------------------------------------------------------------------------------------------------------------------------------------------------------|----------------------------------------------------------------------------------------------------------------------------------------------------------------------------------------------------------------------------------------------------------------------------------------------------------------------------------------------------------------------------------------------------------------------------------------------------------------------------------|
|                                 | <ul style="list-style-type: none"> <li>- DSM-IV: Schizophrenia</li> <li>- Acute exacerbation for &lt;6 months</li> <li>- PANSS 70-120</li> <li>- BMI <math>\geq</math> 40kg/m<sup>2</sup></li> <li>- Disease duration: At least 1 year</li> </ul> <p>Substance abuse allowed: No<br/>Hospitalized at least 2 weeks</p> <p>Must meet inclusion criteria after washout: Not relevant</p>                                                                                                                                                                                                                                                                                                                                                                                                                                                                                                                       | <ul style="list-style-type: none"> <li>- Olanzapine: 91.0 (11.15)</li> <li>- PLB: 90.2 (10.39)</li> </ul> <p>Completed the study: 60%</p> <p>LOCF/ITT-population: Yes</p>                                                                                                                                                                                                                                                                                              | <ul style="list-style-type: none"> <li>- Oral benzodiazepines for agitation, anxiety or sleep difficulties but <math>\leq</math> 6mg/d of lorazepam or equivalent during week 1-2 and an equivalent dose of 3 mg/d of lorazepam thereafter.</li> </ul>                                                                                                                                                                                                                                                                          | <p>Interrater reliability: All investigators and staff involved in rating patients were trained on the key efficacy assessments. Raters were instructed and had to demonstrate acceptable rating accuracy as a condition for being qualified. No <math>\kappa</math>-value.</p>                                                                                                                                                                                                  |
| Bugarski-Kirola et al. 2014[14] | <p>RCT, DB, PLB-controlled, parallel-group, phase II/III 4-arm study</p> <p>Duration:</p> <ul style="list-style-type: none"> <li>- Screening: up to 2 weeks</li> <li>- DB treatment: 4 weeks</li> <li>- Follow up: 4 weeks</li> </ul> <p>Run-in period:</p> <ul style="list-style-type: none"> <li>- Pre baseline washout: No</li> <li>- Pre study trial-drug phase: No</li> </ul> <p>Inclusion criteria:</p> <ul style="list-style-type: none"> <li>- DSM-IV: schizophrenia</li> <li>- Acute exacerbation</li> <li>- PANSS 80-120 and score of <math>\geq</math> 4 on at least two items: Delusions, conceptual disorganization, hallucinatory behavior, suspiciousness, unusual thought content</li> <li>- CGI-S <math>\geq</math> 4</li> </ul> <p>Substance abuse allowed: NSPEC<br/>Hospitalized for the 4 weeks DB treatment period</p> <p>Must meet inclusion criteria after washout: Not relevant</p> | <p>Randomized, N= 301</p> <p>Age, mean, years: 40 (range 18-65)</p> <p>Sex, male: 74.3%</p> <p>Enriched population: Yes</p> <p>PLB-responders withdrawn: Not relevant</p> <p>PANSS-total mean (SD) at BL:</p> <ul style="list-style-type: none"> <li>- Bitopertin 10 mg: 64.8 (9.5)</li> <li>- Bitopertin 30 mg: 65.9 (10.4)</li> <li>- Olanzapine: 63.0 (9.5)</li> <li>- PLB: 65.1 (8.7)</li> </ul> <p>Completed the study: 72.4%</p> <p>LOCF/ITT-population: Yes</p> | <p>Bitopertin at two dosages (n=153) vs Olanzapine 15 mg (n=61) vs PLB (n=79)</p> <p>Administration: Once daily</p> <p>Dose titration: No</p> <p>Fixed doses: Yes</p> <p>Allowed supplemental medication:</p> <ul style="list-style-type: none"> <li>- Benzotropine <math>\leq</math> 4mg/d for emergent EPS.</li> <li>- Lorazepam or equivalent <math>\leq</math> 6 mg/d on days 1-7 and <math>\leq</math> 4mg/d on days 8-28 for anxiety, agitation and restlessness.</li> <li>- Zolpidem &lt;10mg/d for insomnia.</li> </ul> | <p>Primary:</p> <ul style="list-style-type: none"> <li>- PANSS total</li> </ul> <p>Secondary:</p> <ul style="list-style-type: none"> <li>- PANSS-positive</li> <li>- PANSS-negative</li> <li>- CGI-S</li> <li>- NOSIE</li> </ul> <p>Follow up: week 2, 3, 4, 5, 6, 8</p> <p>Interrater reliability: Rated by both side raters and centralized raters. The discrepancy between the two ratings was not allowed to exceed an 8-point difference. No <math>\kappa</math>-value.</p> |

|                         |                                                                                                                                                                                                                                                                                                                                                                                                                                                                                                                                                                                                                                                                                                                                                                                                                                           |                                                                                                                                                                                                                                                                                                                                                                                                                                                                                                   |                                                                                                                                                                                                                                                                                                                                                  |                                                                                                                                                                                                                                                                                                                                                                                                                              |
|-------------------------|-------------------------------------------------------------------------------------------------------------------------------------------------------------------------------------------------------------------------------------------------------------------------------------------------------------------------------------------------------------------------------------------------------------------------------------------------------------------------------------------------------------------------------------------------------------------------------------------------------------------------------------------------------------------------------------------------------------------------------------------------------------------------------------------------------------------------------------------|---------------------------------------------------------------------------------------------------------------------------------------------------------------------------------------------------------------------------------------------------------------------------------------------------------------------------------------------------------------------------------------------------------------------------------------------------------------------------------------------------|--------------------------------------------------------------------------------------------------------------------------------------------------------------------------------------------------------------------------------------------------------------------------------------------------------------------------------------------------|------------------------------------------------------------------------------------------------------------------------------------------------------------------------------------------------------------------------------------------------------------------------------------------------------------------------------------------------------------------------------------------------------------------------------|
| Shen et al.<br>2014[15] | <p>RCT, DB, PLB-controlled, parallel-group trial<br/>4-arm study</p> <p>Duration: 6 weeks</p> <p>Run-in period:</p> <ul style="list-style-type: none"> <li>- Pre baseline washout: Yes (7 days)</li> <li>- Pre study trial-drug phase: No</li> </ul> <p>Inclusion criteria:</p> <ul style="list-style-type: none"> <li>- DSM-IV: Schizophrenia</li> <li>- Acute exacerbation</li> <li>- PANSS 70-120</li> <li>- PANSS-positive <math>\geq 20</math> and scores of <math>\geq 4</math> on at least two items: Delusions, conceptual disorganization, hallucinatory behavior, suspiciousness, unusual thought content</li> <li>- CGI-S <math>\geq 4</math></li> </ul> <p>Substance abuse allowed: No</p> <p>Hospitalized at study entry and at least 4 weeks during DB-treatment</p> <p>Must meet inclusion criteria after washout: Yes</p> | <p>Randomized, N= 289</p> <p>Age, mean, years (SD): 40.2 (10.3)</p> <p>Sex, male: 72.3%</p> <p>Enriched population: Yes</p> <p>PLB-responders withdrawn:<br/>NSPEC</p> <p>PANSS-total mean (SD) at BL, central rated:</p> <ul style="list-style-type: none"> <li>- Vabicaserin 200mg/d: 94.45 (12.07)</li> <li>- Vabicaserin 400mg/d: 95.14 (10.30)</li> <li>- Olanzapine: 94.52 (11.67)</li> <li>- PLB: 94.72 (10.21)</li> </ul> <p>Completed the study: 38%</p> <p>LOCF/ITT-population: Yes</p> | <p>Vabicaserin at two dosages (n=147) vs Olanzapine 15mg/d (n=71) vs PLB (n=71)</p> <p>Administration: B.i.d.</p> <p>Dose titration: No</p> <p>Fixed doses: Yes</p> <p>Allowed supplemental medication:<br/>Lorazepam, clorazepate dipotassium, benztropine, biperiden, trihexyphenidyl Hcl, zaleplon and zolpidem.</p>                          | <p>Primary:</p> <ul style="list-style-type: none"> <li>- PANSS-total</li> </ul> <p>Secondary:</p> <ul style="list-style-type: none"> <li>- PANSS-positive</li> <li>- PANSS-negative</li> <li>- CGI-S</li> <li>- BPRS</li> <li>- CGI-I</li> </ul> <p>Follow up days: 7, 14, 21, 28, 35, 42</p> <p>Interrater reliability:<br/>Comparison of results between a side rater and central rater. No <math>\kappa</math>-value.</p> |
| Davidson<br>2007[16]    | <p>RCT, DB, PLB-controlled<br/>5-arm study</p> <p>Duration: 6 weeks</p> <p>Run-in period:</p> <ul style="list-style-type: none"> <li>- Pre baseline drug washout: yes (3 days)</li> <li>- Pre study trial drug phase: no</li> </ul> <p>Inclusion criteria:</p> <ul style="list-style-type: none"> <li>- DSM-IV: schizophrenia</li> <li>- Acute exacerbation</li> <li>- Disease duration: at least 1 year</li> <li>- PANSS: 70-120</li> </ul>                                                                                                                                                                                                                                                                                                                                                                                              | <p>Randomized, N= 618</p> <p>Age, mean, years (SD): 36.8 (10.6)</p> <p>Sex, male: 68%</p> <p>Enriched population: yes</p> <p>PLB-responders withdrawn:<br/>NSPEC</p> <p>PANSS-total mean (SD) at BL:</p> <ul style="list-style-type: none"> <li>- Paliperidone ER 3 mg: 91.6 (12.2)</li> </ul>                                                                                                                                                                                                    | <p>Paliperidone ER (n=359) at three different dosages vs. Olanzapine 10 mg (n=126) vs. PLB (n=120)</p> <p>Administration: once daily</p> <p>Dose titration: patients in the group receiving PER 15mg were initiated on 12 mg/d on days 1-7 and increased to 15mg/d by day 8.</p> <p>Fixed doses: yes</p> <p>Allowed supplemental medication:</p> | <p>Primary</p> <ul style="list-style-type: none"> <li>- PANSS-total</li> </ul> <p>Secondary</p> <ul style="list-style-type: none"> <li>- CGI-S</li> <li>- PSP</li> <li>- PANSS Marder factor</li> </ul> <p>Follow up (days): 4, 8, 15, 22, 29, 36, 43</p> <p>Interrater reliability:<br/>NSPEC. No <math>\kappa</math>-value.</p>                                                                                            |



|               |                                                                                                                                                                                                                                                                                                                                                                                                                                                                                                                                                                                                                                       |                                                                                                                                                                                                                                                                                                                                                                                                                                                                                                                                                    |                                                                                                                                                                                                                                                                                                                                                                                                                                                                                                                                                                                                                                                                                                                                                                                                           |                                                                                                                                                                                                                                                                                                |
|---------------|---------------------------------------------------------------------------------------------------------------------------------------------------------------------------------------------------------------------------------------------------------------------------------------------------------------------------------------------------------------------------------------------------------------------------------------------------------------------------------------------------------------------------------------------------------------------------------------------------------------------------------------|----------------------------------------------------------------------------------------------------------------------------------------------------------------------------------------------------------------------------------------------------------------------------------------------------------------------------------------------------------------------------------------------------------------------------------------------------------------------------------------------------------------------------------------------------|-----------------------------------------------------------------------------------------------------------------------------------------------------------------------------------------------------------------------------------------------------------------------------------------------------------------------------------------------------------------------------------------------------------------------------------------------------------------------------------------------------------------------------------------------------------------------------------------------------------------------------------------------------------------------------------------------------------------------------------------------------------------------------------------------------------|------------------------------------------------------------------------------------------------------------------------------------------------------------------------------------------------------------------------------------------------------------------------------------------------|
|               | <p>Substance abuse allowed: no<br/>Hospitalized during first 2 weeks</p> <p>Must meet inclusion criteria after washout: NSPEC</p>                                                                                                                                                                                                                                                                                                                                                                                                                                                                                                     | <ul style="list-style-type: none"> <li>- Paliperidone ER 9 mg: 93.9 (13.2)</li> <li>- Paliperidone ER 15 mg: 92.3 (12.3)</li> <li>- Olanzapine: 93.3 (12.2)</li> <li>- PLB: 93.9 (12.7)</li> <li>- Total: 93.0 (12.5)</li> </ul> <p>Completed the study: 59%</p> <p>LOCF/ITT-population: yes</p>                                                                                                                                                                                                                                                   | <ul style="list-style-type: none"> <li>- Benzodiazepine and antidepressants continuation if the patient had been on a stable dose for <math>\geq 3</math> months before the study.</li> <li>- Benzodiazepine: The dosage could be equivalent to lorazepam <math>\leq 6\text{mg/d}</math> during screening and to day 7, <math>\leq 3\text{mg/d}</math> day 8-14 and <math>\leq 2\text{mg/d}</math> days 15-42</li> <li>- Benzotropine 1-2 mg twice daily or 2mg three times daily</li> </ul>                                                                                                                                                                                                                                                                                                              |                                                                                                                                                                                                                                                                                                |
| Kane 2007[17] | <p>RCT, DB, PLB-controlled<br/>5-arm study</p> <p>Duration: 6 weeks</p> <p>Run-in period:</p> <ul style="list-style-type: none"> <li>- Pre baseline drug washout: yes (3 days)</li> <li>- Pre study trial drug phase: no</li> </ul> <p>Inclusion criteria:</p> <ul style="list-style-type: none"> <li>- DSM-IV: schizophrenia</li> <li>- Acute exacerbation</li> <li>- Disease duration: schizophrenia for at least 1 year</li> <li>- PANSS: 70-120</li> </ul> <p>Substance abuse allowed: no<br/>Hospitalized for first 2 weeks thereafter weekly return for assessment</p> <p>Must meet inclusion criteria after washout: NSPEC</p> | <p>Randomized, N= 415</p> <p>Age, mean, years (SD): 37.1 (10.9)</p> <p>Sex, male: 52%</p> <p>Enriched population: yes</p> <p>PLB-responders withdrawn: NSPEC</p> <p>PANSS-total mean (SD) at BL:</p> <ul style="list-style-type: none"> <li>- Paliperidone ER 6 mg: 94.3 (10.5)</li> <li>- Paliperidone ER 9 mg: 93.2 (11.9)</li> <li>- Paliperidone ER 12 mg: 94.6 (11.0)</li> <li>- Olanzapine: 93.0 (10.7)</li> <li>- PLB: 94.1 (10.7)</li> <li>- Total: 93.9 (11.0)</li> </ul> <p>Completed the study: 66%</p> <p>LOCF/ITT-population: yes</p> | <p>Paliperidone ER (n=374) at three different dosages vs. Olanzapine 10mg/d (n=128) vs. PLB (n=126)</p> <p>Administration: once daily</p> <p>Dose titration: no</p> <p>Fixed doses: yes</p> <p>Allowed supplemental medication:</p> <ul style="list-style-type: none"> <li>- Benzodiazepine and antidepressants continuation if the patient had been on a stable dose for <math>\geq 3</math> months before the study.</li> <li>- Benzodiazepine: The dosage could be equivalent to lorazepam <math>\leq 6\text{mg/d}</math> during screening and to day 7, <math>\leq 3\text{mg/d}</math> days 8-14 and <math>\leq 2\text{mg/d}</math> days 15-42. Patients not on a stable dose, discontinued benzodiazepines in week 2.</li> <li>- Benzotropine 1-2 mg twice daily or 2mg three times daily</li> </ul> | <p>Primary</p> <ul style="list-style-type: none"> <li>- PANSS-total</li> </ul> <p>Secondary</p> <ul style="list-style-type: none"> <li>- CGI-S</li> <li>- PSP</li> </ul> <p>Follow up (days): 4, 8, 15, 22, 29, 36, 43</p> <p>Interrater reliability: NSPEC. No <math>\kappa</math>-value.</p> |

|                           |                                                                                                                                                                                                                                                                                                                                                                                                                                                                                                                                                                                                                                                                                                                                                                    |                                                                                                                                                                                                                                                                                                                                                                             |                                                                                                                                                                                                                                                                                                                                                                                                                                                                                                                                                                                                                                                      |                                                                                                                                                                                                                                                                                                                                                                      |
|---------------------------|--------------------------------------------------------------------------------------------------------------------------------------------------------------------------------------------------------------------------------------------------------------------------------------------------------------------------------------------------------------------------------------------------------------------------------------------------------------------------------------------------------------------------------------------------------------------------------------------------------------------------------------------------------------------------------------------------------------------------------------------------------------------|-----------------------------------------------------------------------------------------------------------------------------------------------------------------------------------------------------------------------------------------------------------------------------------------------------------------------------------------------------------------------------|------------------------------------------------------------------------------------------------------------------------------------------------------------------------------------------------------------------------------------------------------------------------------------------------------------------------------------------------------------------------------------------------------------------------------------------------------------------------------------------------------------------------------------------------------------------------------------------------------------------------------------------------------|----------------------------------------------------------------------------------------------------------------------------------------------------------------------------------------------------------------------------------------------------------------------------------------------------------------------------------------------------------------------|
| Potkin et al.<br>2020[18] | <p>RCT, DB, PLB-controlled<br/>3-arm study</p> <p>Duration: 4 weeks</p> <p>Run-in period:</p> <ul style="list-style-type: none"> <li>- Pre baseline drug washout: No</li> <li>- Pre study trial drug phase: No</li> </ul> <p>Inclusion criteria:</p> <ul style="list-style-type: none"> <li>- DSM-IV: schizophrenia</li> <li>- Acute exacerbation</li> <li>- PANSS: <math>\geq 80</math> and scores of <math>\geq 4</math> on at least three items: Delusions, conceptual disorganization, hallucinatory behavior, suspiciousness</li> <li>- CGI-S <math>\geq 4</math></li> <li>- BMI 18-40kg/m<sup>2</sup></li> </ul> <p>Substance abuse allowed: no<br/>Hospitalized for at least the first 2 weeks</p> <p>Must meet inclusion criteria after washout: NSPEC</p> | <p>Randomized, N= 401</p> <p>Age, mean (SD): 41.1 (11.4)</p> <p>Sex, male: 60.8%</p> <p>Enriched population: yes</p> <p>PLB-responders withdrawn: NSPEC</p> <p>PANSS-total mean (SD) at BL:</p> <ul style="list-style-type: none"> <li>- Olanzapine: 100.6 (12.1)</li> <li>- PLB: 102.7 (11.9)</li> </ul> <p>Completed the study: 87.8%</p> <p>LOCF/ITT-population: yes</p> | <p>Olanzapine + Samidorphan (n=132) vs Olanzapine 10mg/d (n=132) vs. PLB (n=133)</p> <p>Administration: once daily</p> <p>Dose titration: yes<br/>At day 1-2 the dose of olanzapine was 10 mg. On day 3 the dose was increased to 20 mg. At the end of week 1 the dose could be decreased for tolerability to 10 mg.</p> <p>Fixed doses: yes</p> <p>Allowed supplemental medication:</p> <ul style="list-style-type: none"> <li>- Beta-blockers</li> <li>- Antihistamines</li> <li>- Anticholinergics for the treatment of akathisia or extrapyramidal symptoms</li> <li>- Lorazepam <math>\leq 2</math> mg/d for extrapyramidal symptoms</li> </ul> | <p>Primary</p> <ul style="list-style-type: none"> <li>- PANSS-total</li> </ul> <p>Secondary</p> <ul style="list-style-type: none"> <li>- CGI-S</li> <li>- PANSS-positive</li> <li>- PANSS-negative</li> </ul> <p>Follow up (days): 7, 14, 21, 28</p> <p>Interrater reliability: NSPEC. No <math>\kappa</math>-value.</p>                                             |
| Egan et al.<br>2013 [19]  | <p>RCT, DB, PLB-controlled<br/>3-arm study</p> <p>Duration: 4 weeks</p> <p>Run-in period:</p> <ul style="list-style-type: none"> <li>- Pre baseline drug washout: yes (3-7 days)</li> <li>- Pre study trial drug phase: No</li> </ul> <p>Inclusion criteria:</p> <ul style="list-style-type: none"> <li>- 18-55 years</li> <li>- DSM-IV: schizophrenia</li> <li>- Disease duration <math>&gt;1</math> year</li> <li>- Acute exacerbation for 3 days to 6 weeks</li> </ul>                                                                                                                                                                                                                                                                                          | <p>Randomized, N= 216</p> <p>Age, mean, years: 37</p> <p>Sex, male: 58%</p> <p>Enriched population: yes</p> <p>PLB-responders withdrawn: yes</p> <p>PANSS-total mean (SD) at BL:</p> <ul style="list-style-type: none"> <li>- Olanzapine: 96.4 (11.2)</li> <li>- PLB: 96.0 (12.9)</li> </ul> <p>Completed the study: 73.1%</p>                                              | <p>MK-8998 16 mg bid (n=86) vs Olanzapine 15mg/d (n=47) vs. PLB (n=83)</p> <p>Administration: twice daily</p> <p>Dose titration: yes<br/>Olanzapine 10 mg/d for 1 week, then 15 mg/d for weeks 2-4.</p> <p>Fixed doses: yes</p> <p>Allowed supplemental medication:</p> <ul style="list-style-type: none"> <li>- Benztropine, Biperiden and trihexyphenidyl allowed for the treatment of extrapyramidal symptoms</li> <li>- Lorazepam <math>\leq 2</math> mg/d</li> </ul>                                                                                                                                                                            | <p>Primary</p> <ul style="list-style-type: none"> <li>- PANSS-total</li> </ul> <p>Secondary</p> <ul style="list-style-type: none"> <li>- CGI-S</li> <li>- MADRS</li> </ul> <p>Follow up (days): 4, 7, 14, 21, 28</p> <p>Interrater reliability: Raters certified. PANSS ratings were reviewed by blinded, independent PANSS experts for internal consistency and</p> |

|                         |                                                                                                                                                                                                                                                                                                                                                                                                                                                                                                                                                                                                                                                                                                                                                                         |                                                                                                                                                                                                                                                                                                                                                                                |                                                                                                                                                                                                                                                                                                                                                                                                                                                                                                                                            |                                                                                                                                                                                                                                                                                                                                                                       |
|-------------------------|-------------------------------------------------------------------------------------------------------------------------------------------------------------------------------------------------------------------------------------------------------------------------------------------------------------------------------------------------------------------------------------------------------------------------------------------------------------------------------------------------------------------------------------------------------------------------------------------------------------------------------------------------------------------------------------------------------------------------------------------------------------------------|--------------------------------------------------------------------------------------------------------------------------------------------------------------------------------------------------------------------------------------------------------------------------------------------------------------------------------------------------------------------------------|--------------------------------------------------------------------------------------------------------------------------------------------------------------------------------------------------------------------------------------------------------------------------------------------------------------------------------------------------------------------------------------------------------------------------------------------------------------------------------------------------------------------------------------------|-----------------------------------------------------------------------------------------------------------------------------------------------------------------------------------------------------------------------------------------------------------------------------------------------------------------------------------------------------------------------|
|                         | <ul style="list-style-type: none"> <li>- PANSS: <math>\geq 70</math> and scores of <math>\geq 4</math> on at least two items: Delusions, conceptual disorganization, hallucinatory behavior, suspiciousness, unusual thought content</li> <li>- CGI-S <math>\geq 4</math></li> </ul> <p>Substance abuse allowed: no<br/>Hospitalization during the study</p> <p>Must meet inclusion criteria after washout: NSPEC</p>                                                                                                                                                                                                                                                                                                                                                   | LOCF/ITT-population: Yes                                                                                                                                                                                                                                                                                                                                                       | <ul style="list-style-type: none"> <li>- Zolpidem <math>\leq 10</math> mg in any 24h period</li> <li>- Temazepam <math>\leq 30</math> mg in any 24h period</li> </ul>                                                                                                                                                                                                                                                                                                                                                                      | relationship to prior ratings from the same patient.<br>No $\kappa$ -value.                                                                                                                                                                                                                                                                                           |
| Kinon et al. 2011 [20]  | <p>RCT, DB, PLB-controlled<br/>6-arm study</p> <p>Duration: 4 weeks</p> <p>Run-in period:</p> <ul style="list-style-type: none"> <li>- Pre baseline drug washout: yes (3 days)</li> <li>- Pre study trial drug phase: No</li> </ul> <p>Inclusion criteria:</p> <ul style="list-style-type: none"> <li>- 18-65 years</li> <li>- DSM-IV: schizophrenia</li> <li>- BPRS total score extracted from the PANSS of <math>\geq 45</math> and scores of <math>\geq 4</math> on at least two items: conceptual disorganization, hallucinatory behavior, suspiciousness, unusual thought content</li> <li>- CGI-S <math>\geq 4</math></li> </ul> <p>Substance abuse allowed: NSPEC<br/>Hospitalization during the study</p> <p>Must meet inclusion criteria after washout: No</p> | <p>Randomized, N= 669</p> <p>Age, mean, years (SD): 38.8 (11.4)</p> <p>Sex, male: 56.5%</p> <p>Enriched population: No</p> <p>PLB-responders withdrawn: No</p> <p>PANSS-total mean (SD) at BL:</p> <ul style="list-style-type: none"> <li>- Olanzapine: 99.6 (10.0)</li> <li>- PLB: 97.6 (12.1)</li> </ul> <p>Completed the study: 58.1%</p> <p>LOCF/ITT-population: NSPEC</p> | <p>LY2140023 vs Olanzapine 15mg/d (n=62) vs. PLB (n=122)</p> <p>Administration: twice daily</p> <p>Dosage groups,</p> <ul style="list-style-type: none"> <li>- LY2140023 5mg bid (n=121)</li> <li>- LY2140023 20 mg bid (n=122)</li> <li>- LY2140023 40 mg bid (n=120)</li> <li>- LY2140023 80 mg bid (n=122)</li> </ul> <p>Dose titration: NSPEC</p> <p>Fixed doses: yes</p> <p>Allowed supplemental medication:</p> <ul style="list-style-type: none"> <li>- Benzodiazepines</li> <li>- Anticholinergics</li> <li>- Lorazepam</li> </ul> | <p>Primary</p> <ul style="list-style-type: none"> <li>- PANSS-total</li> </ul> <p>Secondary</p> <ul style="list-style-type: none"> <li>- PANSS positive</li> <li>- PANSS negative</li> <li>- PANSS general psychopathology</li> <li>- CGI-S</li> </ul> <p>Follow up (days): 7, 14, 21, 28</p> <p>Interrater reliability: NSPEC.<br/>No <math>\kappa</math>-value.</p> |
| Litman et al. 2014 [21] | <p>RCT, DB, PLB-controlled<br/>3-arm study</p> <p>Duration: 4 weeks</p> <p>Run-in period:</p>                                                                                                                                                                                                                                                                                                                                                                                                                                                                                                                                                                                                                                                                           | <p>Randomized, N= 106</p> <p>Age, mean, years: 39.2</p> <p>Sex, male: 95.3%</p>                                                                                                                                                                                                                                                                                                | <p>AZD2624 40mg vs Olanzapine 15mg/d (n=22) vs. PLB (n=41)</p> <p>Administration: once daily</p> <p>Dose titration: NSPEC</p>                                                                                                                                                                                                                                                                                                                                                                                                              | <p>Primary</p> <ul style="list-style-type: none"> <li>- PANSS-total</li> </ul> <p>Secondary</p> <ul style="list-style-type: none"> <li>- CGI-S</li> </ul>                                                                                                                                                                                                             |

|                          |                                                                                                                                                                                                                                                                                                                                                                                                                                                                                                                                                                                                                                                                             |                                                                                                                                                                                                                                                                                                                                                                                                                             |                                                                                                                                                                                                                                                                                                                                                                  |                                                                                                                                                                                                                                                                                                                                                                              |
|--------------------------|-----------------------------------------------------------------------------------------------------------------------------------------------------------------------------------------------------------------------------------------------------------------------------------------------------------------------------------------------------------------------------------------------------------------------------------------------------------------------------------------------------------------------------------------------------------------------------------------------------------------------------------------------------------------------------|-----------------------------------------------------------------------------------------------------------------------------------------------------------------------------------------------------------------------------------------------------------------------------------------------------------------------------------------------------------------------------------------------------------------------------|------------------------------------------------------------------------------------------------------------------------------------------------------------------------------------------------------------------------------------------------------------------------------------------------------------------------------------------------------------------|------------------------------------------------------------------------------------------------------------------------------------------------------------------------------------------------------------------------------------------------------------------------------------------------------------------------------------------------------------------------------|
|                          | <ul style="list-style-type: none"> <li>- Pre baseline drug washout: yes (3-7 days)</li> <li>- Pre study trial drug phase: No</li> </ul> <p>Inclusion criteria:</p> <ul style="list-style-type: none"> <li>- 18-65 years</li> <li>- DSM-IV: schizophrenia (paranoid, undifferentiated, disorganized, catatonic, residual)</li> <li>- PANSS total <math>\geq 70</math></li> </ul> <p>Substance abuse allowed: No<br/>Hospitalization: NSPEC</p> <p>Must meet inclusion criteria after washout: NSPEC</p>                                                                                                                                                                      | <p>Enriched population: Yes</p> <p>PLB-responders withdrawn: No</p> <p>PANSS-total mean (SD) at BL:</p> <ul style="list-style-type: none"> <li>- Olanzapine: 100.59</li> <li>- PLB: 102.1</li> </ul> <p>Completed the study: 76.4%</p> <p>LOCF/ITT-population: Yes</p>                                                                                                                                                      | <p>Fixed doses: yes</p> <p>Allowed supplemental medication:</p> <ul style="list-style-type: none"> <li>- Lorazepam for agitation or anxiety up to 8 mg/d</li> <li>- Zolpidem tartrate up to 10 mg/d for insomnia</li> <li>- Benzotropine mesylate up to 2 mg per 8-hour period for extrapyramidal symptoms</li> <li>- Acetaminophen for pain up to 3g</li> </ul> | <p>Follow up (days): 1, 8, 15, 22, 28</p> <p>Interrater reliability: NSPEC.<br/>No <math>\kappa</math>-value.</p>                                                                                                                                                                                                                                                            |
| Mosolov et al. 2011 [22] | <p>RCT, DB, PLB-controlled 3-arm study</p> <p>Duration: 4 weeks</p> <p>Run-in period:</p> <ul style="list-style-type: none"> <li>- Pre baseline drug washout: yes</li> <li>- Pre study trial drug phase: No</li> </ul> <p>Inclusion criteria:</p> <ul style="list-style-type: none"> <li>- 18-65 years</li> <li>- DSM-IV: schizophrenia</li> <li>- BPRS score <math>\geq 4</math> on at least two items: conceptual disorganization, hallucinatory behavior, suspiciousness, unusual thought content</li> <li>- CGI-S <math>\geq 4</math></li> </ul> <p>Substance abuse allowed: No<br/>Hospitalization: NSPEC</p> <p>Must meet inclusion criteria after washout: NSPEC</p> | <p>Randomized, N= 196</p> <p>Age, mean, years:</p> <ul style="list-style-type: none"> <li>- Olanzapine: 42.3 (<math>\pm 13.0</math>)</li> <li>- PLB: 41.0 (<math>\pm 14.1</math>)</li> </ul> <p>Sex, male: NSPEC</p> <p>Enriched population: No</p> <p>PLB-responders withdrawn: No</p> <p>PANSS-total mean at BL: 94.8 (<math>\pm 11.4</math>)</p> <p>Completed the study: 60.2% (118)</p> <p>LOCF/ITT-population: yes</p> | <p>LY2140023 40 mg bid (n=98) vs Olanzapine 15mg/d (n=34) vs. PLB (n=63)</p> <p>Administration: twice daily</p> <p>Dose titration: NSPEC</p> <p>Fixed doses: yes</p> <p>Allowed supplemental medication: NSPEC</p>                                                                                                                                               | <p>Primary</p> <ul style="list-style-type: none"> <li>- PANSS-total</li> </ul> <p>Secondary</p> <ul style="list-style-type: none"> <li>- CGI-S</li> <li>- PANSS-positive</li> <li>- PANSS-negative</li> <li>- HAM-A</li> </ul> <p>Follow up (days): 7, 14, 21, 28</p> <p>Interrater reliability: Training using videotaped interviews.<br/>No <math>\kappa</math>-value.</p> |

|                          |                                                                                                                                                                                                                                                                                                                                                                                                                                                                                                                                |                                                                                                                                                                                                                                                                            |                                                                                                                                                                                                             |                                                                                                                                                                                                       |
|--------------------------|--------------------------------------------------------------------------------------------------------------------------------------------------------------------------------------------------------------------------------------------------------------------------------------------------------------------------------------------------------------------------------------------------------------------------------------------------------------------------------------------------------------------------------|----------------------------------------------------------------------------------------------------------------------------------------------------------------------------------------------------------------------------------------------------------------------------|-------------------------------------------------------------------------------------------------------------------------------------------------------------------------------------------------------------|-------------------------------------------------------------------------------------------------------------------------------------------------------------------------------------------------------|
| Shen et al.<br>2008 [23] | <p>RCT, PLB-controlled<br/>4-arm study</p> <p>Duration: 6 weeks</p> <p>Run-in period:</p> <ul style="list-style-type: none"> <li>- Pre baseline drug washout: yes (7 days <math>\pm</math> 3 days)</li> <li>- Pre study trial drug phase: NSPEC</li> </ul> <p>Inclusion criteria:</p> <ul style="list-style-type: none"> <li>- 18-65 years</li> <li>- Acute exacerbation of schizophrenia</li> </ul> <p>Substance abuse allowed: NSPEC<br/>Hospitalization: NSPEC</p> <p>Must meet inclusion criteria after washout: NSPEC</p> | <p>Randomized, N= 313</p> <p>Age, mean, years: NSPEC</p> <p>Sex, male: NSPEC</p> <p>Enriched population: No</p> <p>PLB-responders withdrawn:<br/>NSPEC</p> <p>PANSS-total mean (SD) at BL:<br/>NSPEC</p> <p>Completed the study: NSPEC</p> <p>LOCF/ITT-population: Yes</p> | <p>Experimental compound vs Olanzapine 15mg/d<br/>(n=68) vs. PLB (n=68)</p> <p>Administration: NSPEC</p> <p>Dose titration: NSPEC</p> <p>Fixed doses: yes</p> <p>Allowed supplemental medication: NSPEC</p> | <p>Primary</p> <ul style="list-style-type: none"> <li>- PANSS-total</li> </ul> <p>Follow up (days): 7, 14, 21,<br/>28, 35, 42</p> <p>Interrater reliability: <math>\kappa</math>-<br/>value 0.91.</p> |
|--------------------------|--------------------------------------------------------------------------------------------------------------------------------------------------------------------------------------------------------------------------------------------------------------------------------------------------------------------------------------------------------------------------------------------------------------------------------------------------------------------------------------------------------------------------------|----------------------------------------------------------------------------------------------------------------------------------------------------------------------------------------------------------------------------------------------------------------------------|-------------------------------------------------------------------------------------------------------------------------------------------------------------------------------------------------------------|-------------------------------------------------------------------------------------------------------------------------------------------------------------------------------------------------------|

#### INTRAMUSCULAR OLANZAPINE

| Study ID                     | Design                                                                                                                                                                                                                                                                                                                                                                                                                                                                                                                                                                      | Population                                                                                                                                                                                                                                                                                                                                                                                       | Intervention                                                                                                                                                                                                                                                                                                                                                                                                                                                                                                                                                                                                                                                                                             | Outcome measure                                                                                                                                                                                                                                                                                                                                                                        |
|------------------------------|-----------------------------------------------------------------------------------------------------------------------------------------------------------------------------------------------------------------------------------------------------------------------------------------------------------------------------------------------------------------------------------------------------------------------------------------------------------------------------------------------------------------------------------------------------------------------------|--------------------------------------------------------------------------------------------------------------------------------------------------------------------------------------------------------------------------------------------------------------------------------------------------------------------------------------------------------------------------------------------------|----------------------------------------------------------------------------------------------------------------------------------------------------------------------------------------------------------------------------------------------------------------------------------------------------------------------------------------------------------------------------------------------------------------------------------------------------------------------------------------------------------------------------------------------------------------------------------------------------------------------------------------------------------------------------------------------------------|----------------------------------------------------------------------------------------------------------------------------------------------------------------------------------------------------------------------------------------------------------------------------------------------------------------------------------------------------------------------------------------|
| Lauriello et<br>al. 2008[24] | <p>RCT, DB, PLB-controlled<br/>4-arm study</p> <p>Duration: 8 weeks</p> <p>Run-in period:</p> <ul style="list-style-type: none"> <li>- Pre baseline washout: Yes (2-7 days)</li> <li>- Pre study trial-drug phase: No</li> </ul> <p>Inclusion criteria:</p> <ul style="list-style-type: none"> <li>- DSM-IV: Schizophrenia, residual type, disorganized or catatonic</li> <li>- BPRS <math>\geq</math> 30</li> <li>- Disease duration: At least 1 year</li> </ul> <p>Substance abuse allowed: No<br/>Hospitalized for washout and at least 2 weeks of DB<br/>treatment.</p> | <p>Randomized, N= 404</p> <p>Age, mean (SD), years:</p> <ul style="list-style-type: none"> <li>- Olanzapine LAI 210 mg/2 weeks: 39.8 (10.8)</li> <li>- Olanzapine LAI 300 mg/2 weeks: 41.5 (11.1)</li> <li>- Olanzapine LAI 405 mg/4 weeks: 39.5 (11.4)</li> <li>- PLB: 42.6 (11.2)</li> </ul> <p>Sex, male: 70.5%</p> <p>Enriched population: No</p> <p>PLB-responders withdrawn:<br/>NSPEC</p> | <p>Olanzapine LAI at three dosages (n=304) vs PLB<br/>(n=98)</p> <p>Administration: Once daily</p> <p>Dosage groups,</p> <ul style="list-style-type: none"> <li>- Olanzapine LAI 210 mg/2 weeks (n=106)</li> <li>- Olanzapine LAI 300 mg/2 weeks (n=98)</li> <li>- Olanzapine LAI 405 mg/4 weeks (n=100)</li> </ul> <p>Fixed doses: Yes</p> <p>Allowed supplemental medication:</p> <ul style="list-style-type: none"> <li>- Benzodiazepines/sedative hypnotics as sleep aids if equivalent to <math>\leq</math> 2 mg/d of Lorazepam</li> <li>- Anticholinergics for emergent EPS if equivalent to <math>\leq</math> 6 mg/d of Biperiden</li> <li>- Prophylactic use of these was prohibited.</li> </ul> | <p>Primary:</p> <ul style="list-style-type: none"> <li>- PANSS-total</li> </ul> <p>Secondary:</p> <ul style="list-style-type: none"> <li>- PANSS-positive</li> <li>- PANSS-negative</li> <li>- BPRS</li> <li>- CGI-S</li> <li>- CGI-I</li> </ul> <p>Follow up (days): 3, 7, 14,<br/>21, 28, 35, 42, 49, 56</p> <p>Interrater reliability:<br/>NSPEC. No <math>\kappa</math>-value.</p> |

|                          | Must meet inclusion criteria after washout: Yes                                                                                                                                                                                                                                                                                                                                                                                                                                                                                         | <p>PANSS-total mean (SD) at BL:</p> <ul style="list-style-type: none"> <li>- Olanzapine LAI 210 mg/2 weeks: 99.6 (15.8)</li> <li>- Olanzapine LAI 300 mg/2 weeks: 102.6 (15.6)</li> <li>- Olanzapine LAI 405 mg/4 weeks: 101.3 (14.4)</li> <li>- PLB: 100.6 (16.7)</li> </ul> <p>hCompleted the study: 66%<br/>LOCF/ITT-population: Yes</p>                                                                                                                                    |                                                                                                                                                                                                                                                                                                                                                                                                                                                                                                                                                                                                                  |                                                                                                                                                                                                                                                                                                  |
|--------------------------|-----------------------------------------------------------------------------------------------------------------------------------------------------------------------------------------------------------------------------------------------------------------------------------------------------------------------------------------------------------------------------------------------------------------------------------------------------------------------------------------------------------------------------------------|--------------------------------------------------------------------------------------------------------------------------------------------------------------------------------------------------------------------------------------------------------------------------------------------------------------------------------------------------------------------------------------------------------------------------------------------------------------------------------|------------------------------------------------------------------------------------------------------------------------------------------------------------------------------------------------------------------------------------------------------------------------------------------------------------------------------------------------------------------------------------------------------------------------------------------------------------------------------------------------------------------------------------------------------------------------------------------------------------------|--------------------------------------------------------------------------------------------------------------------------------------------------------------------------------------------------------------------------------------------------------------------------------------------------|
| <b>ORAL QUETIAPINE</b>   |                                                                                                                                                                                                                                                                                                                                                                                                                                                                                                                                         |                                                                                                                                                                                                                                                                                                                                                                                                                                                                                |                                                                                                                                                                                                                                                                                                                                                                                                                                                                                                                                                                                                                  |                                                                                                                                                                                                                                                                                                  |
| <b>Study ID</b>          | <b>Design</b>                                                                                                                                                                                                                                                                                                                                                                                                                                                                                                                           | <b>Population</b>                                                                                                                                                                                                                                                                                                                                                                                                                                                              | <b>Intervention</b>                                                                                                                                                                                                                                                                                                                                                                                                                                                                                                                                                                                              | <b>Outcome measure</b>                                                                                                                                                                                                                                                                           |
| Fabre et al.<br>1995[25] | <p>RCT, DB, PLB-controlled</p> <p>Duration: 21 days</p> <p>Run-in period:</p> <ul style="list-style-type: none"> <li>- Pre baseline washout: Yes (2 days)</li> <li>- Pre study trial-drug phase: No</li> </ul> <p>Inclusion criteria:</p> <ul style="list-style-type: none"> <li>- Man</li> <li>- DSM-III: Schizophrenia</li> <li>- BPRS <math>\geq</math> 30</li> <li>- CGI-S <math>\geq</math> 3</li> </ul> <p>Substance abuse allowed: No<br/>Hospitalized at inclusion</p> <p>Must meet inclusion criteria after washout: NSPEC</p> | <p>Randomized, N= 12</p> <p>Age, mean (SD), years:</p> <ul style="list-style-type: none"> <li>- Quetiapine: 34 (20-46)</li> <li>- PLB: 35 (24-45)</li> </ul> <p>Sex, male: 100%</p> <p>Enriched population: No</p> <p>PLB-responders withdrawn:<br/>NSPEC</p> <p>BPRS-total mean (SD) at BL:</p> <ul style="list-style-type: none"> <li>- Quetiapine: 40.5 (8.5)</li> <li>- PLB: 44.0 (12.4)</li> </ul> <p>Completed the study: 91.7% (11)</p> <p>LOCF/ITT-population: Yes</p> | <p>Quetiapine 250 mg (n=8) vs PLB (n=4)</p> <p>Administration: Once daily</p> <p>Dose titration: Quetiapine 25mg/d initially and increased by 25-50 mg approximately every 4 days until the target dose was reached.</p> <p>Fixed doses: Yes</p> <p>Allowed supplemental medication:</p> <ul style="list-style-type: none"> <li>- Chloral hydrate <math>\leq</math> 2500 mg/d for agitation (500mg) and insomnia (500-1000mg)</li> <li>- Benztropine mesylate oral 1-4 mg/d and parenteral 1-2 mL for EPS</li> <li>- Oral diphenhydramine hydrochloride (50mg) for akathisia</li> <li>- Acetaminophen</li> </ul> | <p>Primary:</p> <ul style="list-style-type: none"> <li>- BPRS, 18-items, score 1-7 at each item</li> <li>- CGI</li> </ul> <p>Follow up: BPRS was completed daily, CGI at baseline, day 7 and twice weekly thereafter</p> <p>Interrater reliability:<br/>NSPEC. No <math>\kappa</math>-value.</p> |

|                           |                                                                                                                                                                                                                                                                                                                                                                                                                                                                                                                                                                                                                                                                                                                                                                    |                                                                                                                                                                                                                                                                                                                                                                               |                                                                                                                                                                                                                                                                                                                                                                                                                                                                                                                                                                                                                                                                                                                                                                                                                                                                                                                                                                                                                                                                                                                                                                        |                                                                                                                                                                                                                                                                                                                                                    |
|---------------------------|--------------------------------------------------------------------------------------------------------------------------------------------------------------------------------------------------------------------------------------------------------------------------------------------------------------------------------------------------------------------------------------------------------------------------------------------------------------------------------------------------------------------------------------------------------------------------------------------------------------------------------------------------------------------------------------------------------------------------------------------------------------------|-------------------------------------------------------------------------------------------------------------------------------------------------------------------------------------------------------------------------------------------------------------------------------------------------------------------------------------------------------------------------------|------------------------------------------------------------------------------------------------------------------------------------------------------------------------------------------------------------------------------------------------------------------------------------------------------------------------------------------------------------------------------------------------------------------------------------------------------------------------------------------------------------------------------------------------------------------------------------------------------------------------------------------------------------------------------------------------------------------------------------------------------------------------------------------------------------------------------------------------------------------------------------------------------------------------------------------------------------------------------------------------------------------------------------------------------------------------------------------------------------------------------------------------------------------------|----------------------------------------------------------------------------------------------------------------------------------------------------------------------------------------------------------------------------------------------------------------------------------------------------------------------------------------------------|
| Borison et al. 1996[26]   | <p>RCT, DB, PLB-controlled, parallel-group</p> <p>Duration: 6 weeks</p> <p>Run-in period:</p> <ul style="list-style-type: none"> <li>- Pre baseline washout: Yes (2-10 days)</li> <li>- Pre study trial-drug phase: No</li> </ul> <p>Inclusion criteria:</p> <ul style="list-style-type: none"> <li>- DSM-III: Schizophrenia, chronic or subchronic</li> <li>- Acute exacerbation</li> <li>- BPRS <math>\geq 45</math> and a score of <math>\geq 4</math> of <math>\geq 2</math> of the items: Conceptual disorganization, suspiciousness, hallucinatory behavior, unusual thought content</li> <li>- CGI-S <math>\geq 4</math></li> </ul> <p>Substance abuse allowed: No</p> <p>Hospitalization: NSPEC</p> <p>Must meet inclusion criteria after washout: Yes</p> | <p>Randomized, N= 109</p> <p>Age, mean (range), years: 36 (18-58)</p> <p>Sex, male: 90%</p> <p>Enriched population: No</p> <p>PLB-responders withdrawn: NSPEC</p> <p>PANSS-total mean (SD) at BL:</p> <ul style="list-style-type: none"> <li>- Quetiapine: 55.8 (8.3)</li> <li>- PLB: 54.1 (7.0)</li> </ul> <p>Completed the study: 45.8%</p> <p>LOCF/ITT-population: Yes</p> | <p>Quetiapine (n=53) vs PLB (n=53)</p> <p>Administration: t.i.d.</p> <p>Mean dose: 307 mg/d (range 58-526 mg/d)</p> <p>Dose titration: 25 mg/d on day 1-2. Thereafter the dose was increased by tablets of 25, 50, 100 and 200 mg until an adequate therapeutic effect.</p> <p>Fixed doses: no, maximum daily dose was 750 mg, but doses greater than 500 mg were limited to 14 days.</p> <p>Allowed supplemental medication:</p> <ul style="list-style-type: none"> <li>- Acetaminophen</li> <li>- Chloral hydrate for acute agitation (500mg) and insomnia (500-1000mg) up to 2000mg in 24 hours. Not permitted within 6 hours of efficacy assessments.</li> <li>- Lorazepam 1-2 mg oral or I.M. for agitation or insomnia if chloral hydrate was ineffective. Up to 8 mg in 24 hours and only on day 1-7. Not permitted within 12 hours of efficacy assessments.</li> <li>- EPS rated moderately and duration <math>\geq 24</math> hours were treated with benztropine mesylate <math>\leq 4</math>mg/d oral or <math>\leq 2</math>mg/d parenterally for <math>\leq 3</math> days per episode.</li> <li>- Akathisia: 50 mg diphenhydramine hydrochloride</li> </ul> | <p>Primary:</p> <ul style="list-style-type: none"> <li>- BPRS, 18-items</li> <li>- CGI-S</li> </ul> <p>Secondary:</p> <ul style="list-style-type: none"> <li>- BPRS-factor score</li> <li>- CGI-I</li> <li>- SANS</li> </ul> <p>Follow up (days): 0, 7, 14, 21, 28, 35, 42</p> <p>Interrater reliability: NSPEC. No <math>\kappa</math>-value.</p> |
| Arvanitis et al. 1997[27] | <p>RCT, DB, PLB-controlled 7-arm study</p> <p>Duration: 6 weeks</p> <p>Run-in period:</p> <ul style="list-style-type: none"> <li>- Pre baseline washout: Yes (7 days)</li> </ul>                                                                                                                                                                                                                                                                                                                                                                                                                                                                                                                                                                                   | <p>Randomized, N= 361</p> <p>Age, mean (range), years: 37 (18-64)</p> <p>Sex, male: 75.9%</p>                                                                                                                                                                                                                                                                                 | <p>Quetiapine fumarate at five dosages (n=255) vs Haloperidol 12 mg (n=50) vs PLB (n=51)</p> <p>Administration: t.i.d.</p> <p>Dosage groups,</p> <ul style="list-style-type: none"> <li>- Quetiapine 75 mg (n=52)</li> <li>- Quetiapine 150 mg (n=48)</li> </ul>                                                                                                                                                                                                                                                                                                                                                                                                                                                                                                                                                                                                                                                                                                                                                                                                                                                                                                       | <p>Primary:</p> <ul style="list-style-type: none"> <li>- BPRS, 18-items, score of 0-6 at each item</li> <li>- CGI-S</li> </ul> <p>Secondary:</p> <ul style="list-style-type: none"> <li>- SANS</li> </ul>                                                                                                                                          |

|                       |                                                                                                                                                                                                                                                                                                                                                                                                                                                                                                                                                                                                                                     |                                                                                                                                                                                                                                                                                                                                                                                                                                                                                                                                                                                                     |                                                                                                                                                                                                                                                                                                                                                                                                                                                                                                                                                                                                                                                                                                                                                           |                                                                                                                                                                                                                                                                                                                                                                                                            |
|-----------------------|-------------------------------------------------------------------------------------------------------------------------------------------------------------------------------------------------------------------------------------------------------------------------------------------------------------------------------------------------------------------------------------------------------------------------------------------------------------------------------------------------------------------------------------------------------------------------------------------------------------------------------------|-----------------------------------------------------------------------------------------------------------------------------------------------------------------------------------------------------------------------------------------------------------------------------------------------------------------------------------------------------------------------------------------------------------------------------------------------------------------------------------------------------------------------------------------------------------------------------------------------------|-----------------------------------------------------------------------------------------------------------------------------------------------------------------------------------------------------------------------------------------------------------------------------------------------------------------------------------------------------------------------------------------------------------------------------------------------------------------------------------------------------------------------------------------------------------------------------------------------------------------------------------------------------------------------------------------------------------------------------------------------------------|------------------------------------------------------------------------------------------------------------------------------------------------------------------------------------------------------------------------------------------------------------------------------------------------------------------------------------------------------------------------------------------------------------|
|                       | <ul style="list-style-type: none"> <li>- Pre study trial-drug phase: No</li> </ul> <p>Inclusion criteria:</p> <ul style="list-style-type: none"> <li>- DSM-III: Schizophrenia</li> <li>- Acute exacerbation</li> <li>- BPRS <math>\geq 27</math> and a score of 3 on <math>\geq 2</math> of the items: Conceptual disorganization, suspiciousness, hallucinatory behavior, unusual thought content</li> <li>- CGI <math>\geq 4</math></li> </ul> <p>Substance abuse allowed: NSPEC</p> <p>Hospitalized at least at study entry</p> <p>Must meet inclusion criteria after washout: Yes</p>                                           | <p>Enriched population: No</p> <p>PLB-responders withdrawn: Yes, if <math>\geq 20\%</math> decrease in BPRS-score or a greater than 1-point decrease in CGI-S during the placebo lead-in phase.</p> <p>BPRS-total mean (SE) at BL:</p> <ul style="list-style-type: none"> <li>- Quetiapine 75 mg: 45.7 (10.9)</li> <li>- Quetiapine 150 mg: 47.2 (10.1)</li> <li>- Quetiapine 300 mg: 45.3 (10.9)</li> <li>- Quetiapine 600 mg: 43.5 (11.3)</li> <li>- Quetiapine 750 mg: 45.7 (11.0)</li> <li>- PLB: 45.3 (9.2)</li> </ul> <p>Completed the study: 41.3% (149)</p> <p>LOCF/ITT-population: Yes</p> | <ul style="list-style-type: none"> <li>- Quetiapine 300 mg (n=51)</li> <li>- Quetiapine 600 mg (n=51)</li> <li>- Quetiapine 750 mg (n=53)</li> </ul> <p>Dose titration: The target dose was reached by day 7, if needed at least by day 14</p> <p>Fixed doses: Yes</p> <p>Allowed supplemental medication:</p> <ul style="list-style-type: none"> <li>- Chloral hydrate for insomnia (500-1000) and acute agitation (500 mg), limited to 2000 mg/day. Not permitted within 6 hours of efficacy assessments.</li> <li>- Lorazepam 1-2 mg orally or I.M., permitted through day 14 and <math>\leq 8\text{mg/d}</math> on an emergency basis only. Not permitted within 12 hours of efficacy assessments.</li> <li>- Benztropine mesylate for EPS</li> </ul> | <ul style="list-style-type: none"> <li>- CGI-I</li> </ul> <p>Follow up (days): 7, 14, 21, 28, 35, 42</p> <p>Interrater reliability: Investigators were trained and tested on BPRS and SANS scoring using videotapes. To pass, they were required to rate 80% of the items within one point of the reference-rater for each of the test interviews. No <math>\kappa</math>-value.</p>                       |
| Small et al. 1997[28] | <p>RCT, DB, PLB-controlled 3-arm study</p> <p>Duration: 6 weeks</p> <p>Run-in period:</p> <ul style="list-style-type: none"> <li>- Pre baseline washout: Yes (1-2 days)</li> <li>- Pre study trial-drug phase: No</li> </ul> <p>Inclusion criteria:</p> <ul style="list-style-type: none"> <li>- DSM-III: Schizophrenia – chronic or subchronic</li> <li>- Acute exacerbation</li> <li>- BPRS <math>\geq 27</math> and a score of <math>\geq 4</math> on <math>\geq 2</math> on the BPRS positive-symptom cluster</li> <li>- CGI <math>\geq 4</math></li> </ul> <p>Substance abuse allowed: No</p> <p>Hospitalized at inclusion</p> | <p>Randomized, N= 286</p> <p>Age, mean (SD), years:</p> <ul style="list-style-type: none"> <li>- Quetiapine high dose: 36 (9)</li> <li>- Quetiapine low dose: 37 (9)</li> <li>- PLB: 38 (10)</li> </ul> <p>Sex, male: 71.3%</p> <p>Enriched population: No</p> <p>PLB-responders withdrawn: NSPEC</p> <p>BPRS mean (SD) at BL:</p> <ul style="list-style-type: none"> <li>- Quetiapine high dose: 41.0 (9.6)</li> <li>- Quetiapine low dose: 38.9 (9.8)</li> <li>- PLB: 38.4 (9.7)</li> </ul>                                                                                                       | <p>Quetiapine at two dosages (n=186) vs PLB (n=94)</p> <p>Administration: Once daily</p> <p>Dosage groups:</p> <ul style="list-style-type: none"> <li>- Quetiapine high dose (max 750mg/d) (n=94)</li> <li>- Quetiapine low dose (max 250mg/d) (n=92)</li> </ul> <p>Daily dose of 750 mg was limited to 14 days, after that reduction to 500 mg or less.</p> <p>Fixed doses: No.</p> <p>Allowed supplemental medication:</p> <ul style="list-style-type: none"> <li>- Chloral hydrate 500-1000mg orally, maximum of 2000mg/d, could not be administrated within 6 hours of assessments</li> <li>- Lorazepam 1-2 mg orally or I.M., could not be administrated within 24 hours of assessments</li> </ul>                                                   | <p>Primary:</p> <ul style="list-style-type: none"> <li>- BPRS</li> <li>- CGI-S</li> </ul> <p>Secondary:</p> <ul style="list-style-type: none"> <li>- BPRS-positive cluster</li> <li>- CGI-I</li> <li>- SANS/PANSS-negative subscale</li> </ul> <p>Follow up (days): 7, 14, 21, 28, 35, 42</p> <p>Interrater reliability: Personal trained in the use of the assessments. No <math>\kappa</math>-value.</p> |



|                        |                                                                                                                                                                                                                                                                                                                                                                                                                                                                                                                                                                                                                                                                                                                                                                                                                                                                                                                                                                                                                                  |                                                                                                                                                                                                                                                                                                                                                                                                                                                                                                                                                      |                                                                                                                                                                                                                                                                                                                                                                                                                                                                                                                                                                                                                                                                                                                                                                                                                                                                                                                                                                                                                                                                                                                            |                                                                                                                                                                                                                                                                                                                                                                        |
|------------------------|----------------------------------------------------------------------------------------------------------------------------------------------------------------------------------------------------------------------------------------------------------------------------------------------------------------------------------------------------------------------------------------------------------------------------------------------------------------------------------------------------------------------------------------------------------------------------------------------------------------------------------------------------------------------------------------------------------------------------------------------------------------------------------------------------------------------------------------------------------------------------------------------------------------------------------------------------------------------------------------------------------------------------------|------------------------------------------------------------------------------------------------------------------------------------------------------------------------------------------------------------------------------------------------------------------------------------------------------------------------------------------------------------------------------------------------------------------------------------------------------------------------------------------------------------------------------------------------------|----------------------------------------------------------------------------------------------------------------------------------------------------------------------------------------------------------------------------------------------------------------------------------------------------------------------------------------------------------------------------------------------------------------------------------------------------------------------------------------------------------------------------------------------------------------------------------------------------------------------------------------------------------------------------------------------------------------------------------------------------------------------------------------------------------------------------------------------------------------------------------------------------------------------------------------------------------------------------------------------------------------------------------------------------------------------------------------------------------------------------|------------------------------------------------------------------------------------------------------------------------------------------------------------------------------------------------------------------------------------------------------------------------------------------------------------------------------------------------------------------------|
|                        | Must meet inclusion criteria after washout: NSPEC                                                                                                                                                                                                                                                                                                                                                                                                                                                                                                                                                                                                                                                                                                                                                                                                                                                                                                                                                                                | Completed the study: 44.4%<br><br>LOCF/ITT-population: Yes                                                                                                                                                                                                                                                                                                                                                                                                                                                                                           | - If EPS $\geq$ 24 hours and rated moderate: treatment with 50 mg diphenhydramine hydrochloride or $\leq$ 4mg benztropine mesylate for up to 3 days.                                                                                                                                                                                                                                                                                                                                                                                                                                                                                                                                                                                                                                                                                                                                                                                                                                                                                                                                                                       |                                                                                                                                                                                                                                                                                                                                                                        |
| Potkin et al. 2006[29] | <p>RCT, DB, PLB-controlled<br/>3-arm study</p> <p>Duration: 6 weeks</p> <ul style="list-style-type: none"> <li>- 2 weeks monotherapy with study drug</li> <li>- 4 weeks with additional psychotropic medication if needed</li> </ul> <p>Run-in period:</p> <ul style="list-style-type: none"> <li>- Pre baseline drug washout: No</li> <li>- Pre study trial-drug phase: No</li> </ul> <p>Inclusion criteria:</p> <ul style="list-style-type: none"> <li>- DSM-IV: Schizophrenia (paranoid, disorganized or undifferentiated type) or schizoaffective disorder</li> <li>- Acute exacerbation <math>\leq</math> 4 weeks</li> <li>- Score of <math>\geq</math> 4 on <math>\geq</math> 2 on the PANSS items: Hostility, excitement, tension, uncooperativeness, poor impulse control and a total score of these items of <math>\geq</math> 17.</li> <li>- CGI <math>\geq</math> 5</li> </ul> <p>Substance abuse allowed: Yes<br/>Hospitalized for first 3 weeks</p> <p>Must meet inclusion criteria after washout: Not relevant</p> | <p>Randomized, N= 382</p> <p>Age, mean (SD), years:</p> <ul style="list-style-type: none"> <li>- Risperidone: 34.7 (9.6)</li> <li>- Quetiapine: 34.2 (9.8)</li> <li>- PLB: 36.1 (9.8)</li> </ul> <p>Sex, male: 65.7%</p> <p>Enriched population: No</p> <p>PLB-responders withdrawn: Not relevant</p> <p>PANSS-total mean at BL:</p> <ul style="list-style-type: none"> <li>- Risperidone: 95.0 (18.0)</li> <li>- Quetiapine: 97.3 (19.1)</li> <li>- PLB: 94.3 (18.2)</li> </ul> <p>Completed the study: 74.8%</p> <p>LOCF / ITT population: Yes</p> | <p>Quetiapine 400-600mg (n=156) vs. Risperidone 4-6mg (n=152) vs. PLB (n=71)</p> <p>Administration: Once daily<br/>Dosage, mean (SD at day 14):</p> <ul style="list-style-type: none"> <li>- Quetiapine: 523.8 (168.2)</li> <li>- Risperidone: 4.32 (1.09)</li> </ul> <p>Dose titration: Day 1-5 the quetiapine group was titrated from 50mg/d to the target dose of 400mg/d (<math>\leq</math> 70kg) or 600mg/d (<math>&gt;</math>70kg). On day 8 investigators could increase quetiapine dose to 600mg/d (<math>\leq</math> 70kg) or 800mg/d (<math>&gt;</math>70kg).</p> <p>Fixed doses: no</p> <p>Allowed supplemental medication:</p> <ul style="list-style-type: none"> <li>- Day 1-14: zolpidem, zaleplon, zopiclone for insomnia and injectable lorazepam, sodium amytal, midazolam for agitation and restlessness</li> <li>- After day 14: any psychotropic medication necessary except drugs known to interact with CYP2D6 and CYP3A4 and drugs with potential thyroid toxicity.</li> <li>- Benztropine mesylate or equivalent for movement disorders permitted during the entire study if necessary.</li> </ul> | <p>Primary:</p> <ul style="list-style-type: none"> <li>- PANSS-total</li> </ul> <p>Secondary:</p> <ul style="list-style-type: none"> <li>- PANSS Marder factors</li> <li>- CGI-S</li> <li>- HAM-D-17</li> </ul> <p>Follow up (days): 3, 5, 7, 9, 14, 21, 28, 42</p> <p>Interrater reliability: Raters trained to use the scales.<br/>No <math>\kappa</math>-value.</p> |
| Canuso et al. 2009[30] | <p>RCT, DB, PLB-controlled<br/>3-arm study</p> <p>Duration: 6 weeks</p> <ul style="list-style-type: none"> <li>- 2 weeks monotherapy with study drug</li> </ul>                                                                                                                                                                                                                                                                                                                                                                                                                                                                                                                                                                                                                                                                                                                                                                                                                                                                  | <p>Randomized, N= 399</p> <p>Age, mean (SD), years:</p> <ul style="list-style-type: none"> <li>- Quetiapine: 36.9 (10.2)</li> <li>- Paliperidone ER: 35.7 (11.6)</li> <li>- PLB: 36.1 (10.4)</li> </ul>                                                                                                                                                                                                                                                                                                                                              | <p>Quetiapine 600-800mg (n=157) vs Paliperidone ER 9-12 mg (n=157) vs PLB (n=80)</p> <p>Administration: Once daily<br/>Dosage, mean (SD) during monotherapy phase:</p> <ul style="list-style-type: none"> <li>- Paliperidone ER: 10.4 (1.7)</li> </ul>                                                                                                                                                                                                                                                                                                                                                                                                                                                                                                                                                                                                                                                                                                                                                                                                                                                                     | <p>Primary:</p> <ul style="list-style-type: none"> <li>- PANSS-total</li> </ul> <p>Secondary:</p> <ul style="list-style-type: none"> <li>- CGI-S</li> </ul>                                                                                                                                                                                                            |

|                                                                                                                                                                                                                                                                                                                                                                                                                                                                                                                                                                                                                                                                                                                                                                                                                                                                                                                                                                                                                             |                                                                                                                                                                                                                                                                                                                                                                               |                                                                                                                                                                                                                                                                                                                                                                                                                                                                                                                                                                                                                                                                                                                                                                                                                                                                                            |                                                                                                                                   |
|-----------------------------------------------------------------------------------------------------------------------------------------------------------------------------------------------------------------------------------------------------------------------------------------------------------------------------------------------------------------------------------------------------------------------------------------------------------------------------------------------------------------------------------------------------------------------------------------------------------------------------------------------------------------------------------------------------------------------------------------------------------------------------------------------------------------------------------------------------------------------------------------------------------------------------------------------------------------------------------------------------------------------------|-------------------------------------------------------------------------------------------------------------------------------------------------------------------------------------------------------------------------------------------------------------------------------------------------------------------------------------------------------------------------------|--------------------------------------------------------------------------------------------------------------------------------------------------------------------------------------------------------------------------------------------------------------------------------------------------------------------------------------------------------------------------------------------------------------------------------------------------------------------------------------------------------------------------------------------------------------------------------------------------------------------------------------------------------------------------------------------------------------------------------------------------------------------------------------------------------------------------------------------------------------------------------------------|-----------------------------------------------------------------------------------------------------------------------------------|
| <ul style="list-style-type: none"> <li>- 4 weeks with additional psychotropic medication if needed</li> </ul> <p>Run-in period:</p> <ul style="list-style-type: none"> <li>- Pre baseline drug washout: No</li> <li>- Pre study trial-drug phase: No</li> </ul> <p>Inclusion criteria:</p> <ul style="list-style-type: none"> <li>- DSM-IV: Schizophrenia (paranoid, disorganized or undifferentiated type)</li> <li>- Acute exacerbation, &gt;4 days and &lt;4 weeks</li> <li>- PANSS score of <math>\geq 4</math> at <math>\geq 2</math> of the items: Hostility, excitement, tension, uncooperativeness, poor impulse control and a score of <math>\geq 17</math> on these items</li> <li>- CGI-I <math>\geq 5</math></li> <li>- Hospitalized or required hospitalization</li> </ul> <p>Substance abuse allowed: Yes, but excluded if acute psychotic symptoms are explained by substance use<br/>Hospitalized at inclusion and for at least 10 days</p> <p>Must meet inclusion criteria after washout: Not relevant</p> | <p>Sex, male: 66.5%</p> <p>Enriched population: Yes</p> <p>PLB-responders withdrawn: Not relevant</p> <p>PANSS-total mean at BL:</p> <ul style="list-style-type: none"> <li>- Quetiapine: 101.3 (13.3)</li> <li>- Paliperidone ER: 102.8 (13.1)</li> <li>- PLB: 103.8 (15.7)</li> </ul> <p>Completed the study monotherapy phase: 85.5%</p> <p>LOCF / ITT population: Yes</p> | <ul style="list-style-type: none"> <li>- Quetiapine: 690.9 (134.3)</li> </ul> <p>Dose titration: Quetiapine 50mg/d on day 1, 100mg/d on day 2, 200mg/d on day 3, 400mg/d on day 4, 600mg/d on day 5 and optional increase to 800mg/d on day 8. After day 14 the dose was fixed.</p> <p>Fixed doses: no</p> <p>Allowed supplemental medication:</p> <ul style="list-style-type: none"> <li>- Day 1-14: Injectable lorazepam, amobarbital sodium or midazolam for agitation or restlessness, zaleplon, zopiclone or zolpidem for insomnia and benztropine mesylate or equivalent for movement disorders.</li> <li>- After day 14: any psychotropic medication except risperidone, additional paliperidone ER, quetiapine, drugs that interact with CYP2A4, lithium, herbal or over-the-counter medication that have psychotropic effects and drugs that prolong the QTc-interval.</li> </ul> | <p>Follow up (days): 3, 5, 7, 9, 14, 21, 28, 42, endpoint</p> <p>Interrater reliability: NSPEC. No <math>\kappa</math>-value.</p> |
|-----------------------------------------------------------------------------------------------------------------------------------------------------------------------------------------------------------------------------------------------------------------------------------------------------------------------------------------------------------------------------------------------------------------------------------------------------------------------------------------------------------------------------------------------------------------------------------------------------------------------------------------------------------------------------------------------------------------------------------------------------------------------------------------------------------------------------------------------------------------------------------------------------------------------------------------------------------------------------------------------------------------------------|-------------------------------------------------------------------------------------------------------------------------------------------------------------------------------------------------------------------------------------------------------------------------------------------------------------------------------------------------------------------------------|--------------------------------------------------------------------------------------------------------------------------------------------------------------------------------------------------------------------------------------------------------------------------------------------------------------------------------------------------------------------------------------------------------------------------------------------------------------------------------------------------------------------------------------------------------------------------------------------------------------------------------------------------------------------------------------------------------------------------------------------------------------------------------------------------------------------------------------------------------------------------------------------|-----------------------------------------------------------------------------------------------------------------------------------|

#### QUETIAPINE EXTENDED RELEASE

| Study ID              | Design                                                                                                                                                                                                                                                                                                                                                                                                                          | Population                                                                                                                                                                                                                                                                                                   | Intervention                                                                                                                                                                                                                                                                                                                                                                                                                             | Outcome measure                                                                                                                                                                                                                                                                               |
|-----------------------|---------------------------------------------------------------------------------------------------------------------------------------------------------------------------------------------------------------------------------------------------------------------------------------------------------------------------------------------------------------------------------------------------------------------------------|--------------------------------------------------------------------------------------------------------------------------------------------------------------------------------------------------------------------------------------------------------------------------------------------------------------|------------------------------------------------------------------------------------------------------------------------------------------------------------------------------------------------------------------------------------------------------------------------------------------------------------------------------------------------------------------------------------------------------------------------------------------|-----------------------------------------------------------------------------------------------------------------------------------------------------------------------------------------------------------------------------------------------------------------------------------------------|
| Loebel et al 2013[31] | <p>RCT, DB, PLB-controlled 4-arm study</p> <p>Duration: 6 weeks</p> <p>Run-in period:</p> <ul style="list-style-type: none"> <li>- Pre baseline washout: Yes (3-7 days)</li> <li>- Pre study trial-drug phase: No</li> </ul> <p>Inclusion criteria:</p> <ul style="list-style-type: none"> <li>- DSM-IV: Schizophrenia</li> <li>- Acute exacerbation <math>\leq 2</math> months</li> <li>- CGI-S <math>\geq 4</math></li> </ul> | <p>Randomized, N= 488</p> <p>Age, mean (SD), years:</p> <ul style="list-style-type: none"> <li>- Lurasidone 80 mg: 36.2 (10.9)</li> <li>- Lurasidone 160 mg: 37.9 (11.3)</li> <li>- Quetiapine XR: 37.4 (10.4)</li> <li>- PLB: 37.4 (10.8)</li> </ul> <p>Sex, male: 68.6%</p> <p>Enriched population: No</p> | <p>Lurasidone at two dosages (n=246) vs quetiapine XR 600 mg (n=116) PLB (n=120)</p> <p>Administration: Once daily (evening)</p> <p>Dosage groups,</p> <ul style="list-style-type: none"> <li>- Lurasidone 80 mg (n=125)</li> <li>- Lurasidone 160 mg (n=121)</li> </ul> <p>Dose titration: The Quetiapine XR 600mg/d group was treated with 300mg/d on day 1-2 before being increased to their target dose.</p> <p>Fixed doses: Yes</p> | <p>Primary:</p> <ul style="list-style-type: none"> <li>- PANSS-total</li> </ul> <p>Secondary:</p> <ul style="list-style-type: none"> <li>- PANSS subscales</li> <li>- CGI-S</li> <li>- NSA-16</li> <li>- MADRS</li> <li>- QWB-SA</li> </ul> <p>Follow up (days): 4, 7, 14, 21, 28, 35, 42</p> |

|                      |                                                                                                                                                                                                                                                                                                                                                                                                                                                                                                                                                                                                                                                                                                                                                                                                                                                                                |                                                                                                                                                                                                                                                                                                                                                                                                                                                                                                                                                                                                                                                                                                    |                                                                                                                                                                                                                                                                                                                                                                                                                                                                                                                                                                                                                                                                                                                                                            |                                                                                                                                                                                                                                                                                                                                                                                                                                                                                                                                                                                                                                                                                                  |
|----------------------|--------------------------------------------------------------------------------------------------------------------------------------------------------------------------------------------------------------------------------------------------------------------------------------------------------------------------------------------------------------------------------------------------------------------------------------------------------------------------------------------------------------------------------------------------------------------------------------------------------------------------------------------------------------------------------------------------------------------------------------------------------------------------------------------------------------------------------------------------------------------------------|----------------------------------------------------------------------------------------------------------------------------------------------------------------------------------------------------------------------------------------------------------------------------------------------------------------------------------------------------------------------------------------------------------------------------------------------------------------------------------------------------------------------------------------------------------------------------------------------------------------------------------------------------------------------------------------------------|------------------------------------------------------------------------------------------------------------------------------------------------------------------------------------------------------------------------------------------------------------------------------------------------------------------------------------------------------------------------------------------------------------------------------------------------------------------------------------------------------------------------------------------------------------------------------------------------------------------------------------------------------------------------------------------------------------------------------------------------------------|--------------------------------------------------------------------------------------------------------------------------------------------------------------------------------------------------------------------------------------------------------------------------------------------------------------------------------------------------------------------------------------------------------------------------------------------------------------------------------------------------------------------------------------------------------------------------------------------------------------------------------------------------------------------------------------------------|
|                      | <ul style="list-style-type: none"> <li>- PANSS <math>\geq 80</math> and score of <math>\geq 4</math> on <math>\geq 2</math> of items: Delusions, conceptual disorganization, hallucinations, unusual thought content and suspiciousness</li> <li>- Disease duration &gt; 1 year</li> </ul> <p>Substance abuse allowed: NSPEC<br/>Hospitalized at least 21 days</p> <p>Must meet inclusion criteria after washout: Yes</p>                                                                                                                                                                                                                                                                                                                                                                                                                                                      | <p>PLB-responders withdrawn: NSPEC</p> <p>PANSS-total mean (SD) at BL:</p> <ul style="list-style-type: none"> <li>- Lurasidone 80 mg: 97.7 (9.7)</li> <li>- Lurasidone 160 mg: 97.5 (11.8)</li> <li>- Quetiapine: 97.7 (10.2)</li> <li>- PLB: 96.6 (10.2)</li> </ul> <p>Completed the study: 72.3% (353)</p> <p>LOCF/ITT-population: Yes</p>                                                                                                                                                                                                                                                                                                                                                       | <p>Allowed supplemental medication: NSPEC</p>                                                                                                                                                                                                                                                                                                                                                                                                                                                                                                                                                                                                                                                                                                              | <p>Interrater reliability: NSPEC. No <math>\kappa</math>-value.</p>                                                                                                                                                                                                                                                                                                                                                                                                                                                                                                                                                                                                                              |
| Kahn et al. 2007[32] | <p>RCT, DB, PLB-controlled 5-arm study</p> <p>Duration: 6 weeks</p> <p>Run-in period:</p> <ul style="list-style-type: none"> <li>- Pre baseline washout: Yes (2 days)</li> <li>- Pre study trial-drug phase: No</li> </ul> <p>Inclusion criteria:</p> <ul style="list-style-type: none"> <li>- DSM-IV: Schizophrenia: catatonic, disorganized, paranoid or undifferentiated type</li> <li>- Worsening of the patient's condition in the previous 3 weeks in the opinion of the investigator.</li> <li>- PANSS <math>\geq 70</math> and a score of <math>\geq 4</math> for at least one of the following items: Delusions, conceptual disorganization, hallucinatory behavior, suspiciousness</li> <li>- CGI-S <math>\geq 4</math></li> </ul> <p>Substance abuse allowed: No<br/>Both in- and outpatients included</p> <p>Must meet inclusion criteria after washout: NSPEC</p> | <p>Randomized, N= 588</p> <p>Age, mean (SD), years:</p> <ul style="list-style-type: none"> <li>- XR 400 mg/d: 34.1 (9.6)</li> <li>- XR 600 mg/d: 34.2 (9.9)</li> <li>- XR 800 mg/d: 34.4 (10.3)</li> <li>- IR 400 mg/d: 34.4 (10.2)</li> <li>- PLB: 34.1 (12.1)</li> </ul> <p>Sex, male: 60.2%</p> <p>Enriched population: Yes</p> <p>PLB-responders withdrawn: NSPEC</p> <p>PANSS-total mean (SD) at BL:</p> <ul style="list-style-type: none"> <li>- XR 400 mg/d: 95.8 (13.9)</li> <li>- XR 600 mg/d: 96.8 (14.1)</li> <li>- XR 800 mg/d: 97.3 (14.7)</li> <li>- IR 400 mg/d: 96.5 (16.0)</li> <li>- PLB: 96.2 (13.3)</li> </ul> <p>Completed the study: 76%</p> <p>LOCF/ITT-population: Yes</p> | <p>Quetiapine XR at 3 dosages (n=339) vs Quetiapine IR 400 mg (n=119) vs PLB (n=115)</p> <p>Administration: B.i.d.</p> <p>Dosage groups,</p> <ul style="list-style-type: none"> <li>- Quetiapine XR 400 mg/d (n=111)</li> <li>- Quetiapine XR 600 mg/d (n=111)</li> <li>- Quetiapine XR 800 mg/d (n=117)</li> </ul> <p>Fixed doses: Yes</p> <p>Allowed supplemental medication:</p> <ul style="list-style-type: none"> <li>- Anticholinergics to treat emergent EPS</li> <li>- Lorazepam <math>\leq 6</math>mg/d, only the first 6 days</li> <li>- Oxazepam <math>\leq 60</math>mg/d, only the first 6 days</li> <li>- Hypnotics and sedatives continuation, taken at bedtime only</li> <li>- Zolpidem, chloral hydrate, zaleplon and zopiclone</li> </ul> | <p>Primary:</p> <ul style="list-style-type: none"> <li>- PANSS-total</li> </ul> <p>Secondary:</p> <ul style="list-style-type: none"> <li>- CGI-S</li> <li>- CGI-I</li> <li>- PANSS response rate</li> <li>- PANSS positive subscale</li> <li>- PANSS negative subscale</li> <li>- PANSS general psychopathology</li> <li>- PANSS aggression and hostility cluster</li> <li>- PANSS depression cluster</li> </ul> <p>Follow up (days): 7, 14, 21, 28, 42</p> <p>Inter-rater reliability:</p> <ul style="list-style-type: none"> <li>- Overall <math>\kappa = 0.819</math></li> <li>- Lowest 0.379</li> <li>- All other <math>&gt;0.49</math></li> <li>- Majority <math>&gt;0.83</math></li> </ul> |

|                             |                                                                                                                                                                                                                                                                                                                                                                                                                                                                                                                                                                                                                                                                                                                                                                                                                                                                               |                                                                                                                                                                                                                                                                                                                                                                                                                                                                                                                                                                                                                                                                                                                                                                              |                                                                                                                                                                                                                                                                                                                                                                                                                                                                                                                                                                                                                                                                                                                                          |                                                                                                                                                                                                                                                                                                                                                                                                                                                                                                          |
|-----------------------------|-------------------------------------------------------------------------------------------------------------------------------------------------------------------------------------------------------------------------------------------------------------------------------------------------------------------------------------------------------------------------------------------------------------------------------------------------------------------------------------------------------------------------------------------------------------------------------------------------------------------------------------------------------------------------------------------------------------------------------------------------------------------------------------------------------------------------------------------------------------------------------|------------------------------------------------------------------------------------------------------------------------------------------------------------------------------------------------------------------------------------------------------------------------------------------------------------------------------------------------------------------------------------------------------------------------------------------------------------------------------------------------------------------------------------------------------------------------------------------------------------------------------------------------------------------------------------------------------------------------------------------------------------------------------|------------------------------------------------------------------------------------------------------------------------------------------------------------------------------------------------------------------------------------------------------------------------------------------------------------------------------------------------------------------------------------------------------------------------------------------------------------------------------------------------------------------------------------------------------------------------------------------------------------------------------------------------------------------------------------------------------------------------------------------|----------------------------------------------------------------------------------------------------------------------------------------------------------------------------------------------------------------------------------------------------------------------------------------------------------------------------------------------------------------------------------------------------------------------------------------------------------------------------------------------------------|
| Lindenmayer et al. 2008[33] | <p>RCT, DB, PLB-controlled 6-arm study</p> <p>Duration: 6 weeks</p> <p>Run-in period:</p> <ul style="list-style-type: none"> <li>- Pre baseline washout: Yes (2 days)</li> <li>- Pre study trial-drug phase: No</li> </ul> <p>Inclusion criteria:</p> <ul style="list-style-type: none"> <li>- DSM-IV: Schizophrenia: Catatonic, disorganized, paranoid or undifferentiated type</li> <li>- Worsening of the patient's condition in the previous 3 weeks in the opinion of the investigator.</li> <li>- PANSS <math>\geq 60</math> and a score of <math>\geq 4</math> for at least one of the following items: Delusions, conceptual disorganization, hallucinatory behavior, suspiciousness</li> <li>- CGI-S <math>\geq 4</math></li> </ul> <p>Substance abuse allowed: No</p> <p>Hospitalized at least 10 days</p> <p>Must meet inclusion criteria after washout: NSPEC</p> | <p>Randomized, N= 532</p> <p>Age, mean (SD), years:</p> <ul style="list-style-type: none"> <li>- XR 300 mg/d: 39.1 (11.2)</li> <li>- XR 600 mg/d: 38.9 (9.3)</li> <li>- XR 800 mg/d: 37.8 (10.5)</li> <li>- IR 300 mg/d: 39.8 (10.6)</li> <li>- IR 600 mg/d: 40.6 (9.7)</li> <li>- PLB: 38.4 (10.1)</li> </ul> <p>Sex, male: 74.7%</p> <p>Enriched population: Yes</p> <p>PLB-responders withdrawn: NSPEC</p> <p>PANSS-total mean (SD) at BL:</p> <ul style="list-style-type: none"> <li>- XR 300 mg/d: 91.8 (19.4)</li> <li>- XR 600 mg/d: 92.5 (17.3)</li> <li>- XR 800 mg/d: 89.2 (15.1)</li> <li>- IR 300 mg/d: 89.5 (15.7)</li> <li>- IR 600 mg/d: 88.6 (17.4)</li> <li>- PLB: 91.3 (16.4)</li> </ul> <p>Completed the study: 41.7%</p> <p>LOCF/ITT-population: Yes</p> | <p>Quetiapine XR at three dosages (n=255) vs Quetiapine IR at two dosages (n=165) vs PLB (n=78)</p> <p>Administration: B.i.d.</p> <p>Dosage groups,</p> <ul style="list-style-type: none"> <li>- Quetiapine XR 300 mg/d (n=83)</li> <li>- Quetiapine XR 600 mg/d (n=87)</li> <li>- Quetiapine XR 800 mg/d (n=85)</li> <li>- Quetiapine IR 300 mg/d (n=85)</li> <li>- Quetiapine IR 600 mg/d (n=80)</li> </ul> <p>Fixed doses: Yes</p> <p>Allowed supplemental medication:</p> <ul style="list-style-type: none"> <li>- Anticholinergics to treat emergent EPS</li> <li>- Lorazepam <math>\leq 4</math>mg/d day 1-3 and <math>\leq 2</math> mg/d day 4-6</li> <li>- Continuation medication for sleep if taken at bedtime only</li> </ul> | <p>Primary:</p> <ul style="list-style-type: none"> <li>- PANSS-total</li> </ul> <p>Secondary:</p> <ul style="list-style-type: none"> <li>- CGI-S</li> <li>- CGI-I</li> <li>- PANSS positive subscale</li> <li>- PANSS negative subscale</li> <li>- PANSS general psychopathology</li> </ul> <p>Follow up (days): 4, 8, 15, 28, 42</p> <p>Inter-rater reliability:</p> <p>At each center, a single certified PANSS rater conducted all PANSS assessments across visits. No <math>\kappa</math>-value.</p> |
|-----------------------------|-------------------------------------------------------------------------------------------------------------------------------------------------------------------------------------------------------------------------------------------------------------------------------------------------------------------------------------------------------------------------------------------------------------------------------------------------------------------------------------------------------------------------------------------------------------------------------------------------------------------------------------------------------------------------------------------------------------------------------------------------------------------------------------------------------------------------------------------------------------------------------|------------------------------------------------------------------------------------------------------------------------------------------------------------------------------------------------------------------------------------------------------------------------------------------------------------------------------------------------------------------------------------------------------------------------------------------------------------------------------------------------------------------------------------------------------------------------------------------------------------------------------------------------------------------------------------------------------------------------------------------------------------------------------|------------------------------------------------------------------------------------------------------------------------------------------------------------------------------------------------------------------------------------------------------------------------------------------------------------------------------------------------------------------------------------------------------------------------------------------------------------------------------------------------------------------------------------------------------------------------------------------------------------------------------------------------------------------------------------------------------------------------------------------|----------------------------------------------------------------------------------------------------------------------------------------------------------------------------------------------------------------------------------------------------------------------------------------------------------------------------------------------------------------------------------------------------------------------------------------------------------------------------------------------------------|

#### ORAL ZOTEPINE

| Study ID                       | Design                                                                                                    | Population                                                                                                                                                                                                             | Intervention                                                                                                                                                                                                 | Outcome measure                                                                                                                                                                                         |
|--------------------------------|-----------------------------------------------------------------------------------------------------------|------------------------------------------------------------------------------------------------------------------------------------------------------------------------------------------------------------------------|--------------------------------------------------------------------------------------------------------------------------------------------------------------------------------------------------------------|---------------------------------------------------------------------------------------------------------------------------------------------------------------------------------------------------------|
| Cooper et al. 2000 (March)[34] | <p>RCT, DB, PLB-controlled, parallel-group 3-arm study</p> <p>Duration: 8 weeks</p> <p>Run-in period:</p> | <p>Randomized, N= 159</p> <p>Age, mean (range), years:</p> <ul style="list-style-type: none"> <li>- Zotepine: 39.6 (20.8-64.2)</li> <li>- Chlorpromazine: 41.0 (20.4-60.6)</li> <li>- PLB: 36.3 (19.4-62.7)</li> </ul> | <p>Zotepine 300mg/d (n=53) vs Chlorpromazine 600mg/d (n=52) vs PLB (n=53)</p> <p>Administration: T.i.d.</p> <p>Dose titration: Zotepine 150mg/d on days 1-6, 300mg/d on day 7 and onward. Chlorpromazine</p> | <p>Primary:</p> <ul style="list-style-type: none"> <li>- BPRS, 18-items, score 0-7 at each item</li> </ul> <p>Secondary:</p> <ul style="list-style-type: none"> <li>- CGI-S</li> <li>- CGI-I</li> </ul> |

|                               |                                                                                                                                                                                                                                                                                                                                                                                                                                                                                                                                                                                                                                                     |                                                                                                                                                                                                                                                                                                                                                                                                                                                                                      |                                                                                                                                                                                                                                                                                                                                                                                                                                                            |                                                                                                                                                                                                                                                                                                                                                                                                                 |
|-------------------------------|-----------------------------------------------------------------------------------------------------------------------------------------------------------------------------------------------------------------------------------------------------------------------------------------------------------------------------------------------------------------------------------------------------------------------------------------------------------------------------------------------------------------------------------------------------------------------------------------------------------------------------------------------------|--------------------------------------------------------------------------------------------------------------------------------------------------------------------------------------------------------------------------------------------------------------------------------------------------------------------------------------------------------------------------------------------------------------------------------------------------------------------------------------|------------------------------------------------------------------------------------------------------------------------------------------------------------------------------------------------------------------------------------------------------------------------------------------------------------------------------------------------------------------------------------------------------------------------------------------------------------|-----------------------------------------------------------------------------------------------------------------------------------------------------------------------------------------------------------------------------------------------------------------------------------------------------------------------------------------------------------------------------------------------------------------|
|                               | <ul style="list-style-type: none"> <li>- Pre baseline washout: No (stop oral antipsychotics at study entry. If treated with depot antipsychotics <math>\geq 1</math> dose interval had to have been omitted before study entry)</li> <li>- Pre study trial-drug phase: no</li> </ul> <p>Inclusion criteria:</p> <ul style="list-style-type: none"> <li>- DSM-III: Schizophrenia</li> <li>- Acute episode or acute exacerbation of subchronic or chronic schizophrenia</li> <li>- CGI-S <math>\geq 4</math></li> </ul> <p>Substance abuse allowed: No<br/>Hospitalization: NSPEC</p> <p>Must meet inclusion criteria after washout: Not relevant</p> | <p>Sex, male: 72.3%</p> <p>Enriched population: No</p> <p>PLB-responders withdrawn: Not relevant</p> <p>BPRS-total mean at BL:</p> <ul style="list-style-type: none"> <li>- Zotepine: 60.2</li> <li>- Chlorpromazine: 56.9</li> <li>- PLB: 57.9</li> </ul> <p>Completed the study: 56%</p> <p>LOCF/ITT-population: Yes</p>                                                                                                                                                           | <p>200mg/d on days 1-6 and increased to 600mg/d on day 7 and onward.</p> <p>Fixed doses: If the dose level was not tolerated the daily dose could be reduced to 150mg/d of zotepine and 300mg/d of chlorpromazine</p> <p>Allowed supplemental medication:</p> <ul style="list-style-type: none"> <li>- Psychotropic agents only benzodiazepines and chloral hydrate</li> <li>- All other treatments allowed including anticholinergics for EPS.</li> </ul> | <ul style="list-style-type: none"> <li>- SANS</li> </ul> <p>Follow up (week): 1, 2, 4, 6, 8</p> <p>Interrater reliability: NSPEC. No <math>\kappa</math>-value.</p>                                                                                                                                                                                                                                             |
| Cooper et al. 2000 (June)[35] | <p>RCT, DB, PLB-controlled, parallel-group trial</p> <p>Duration: 26 weeks</p> <p>Run-in period:</p> <ul style="list-style-type: none"> <li>- Pre baseline washout: No</li> <li>- Pre study trial-drug phase: No</li> </ul> <p>Inclusion criteria:</p> <ul style="list-style-type: none"> <li>- DSM-III: Schizophrenia, chronic</li> <li>- History of recurrence within the past 18 months</li> <li>- CGI-S <math>\geq 3</math></li> </ul> <p>Substance abuse allowed: No<br/>Hospitalization: both in- and outpatients included</p> <p>Must meet inclusion criteria after washout: Not relevant</p>                                                | <p>Randomized, N= 121</p> <p>Age, mean (SD), years:</p> <ul style="list-style-type: none"> <li>- Zotepine: 43.0 (12.5)</li> <li>- PLB: 41.6 (12.4)</li> </ul> <p>Sex, male: 68.9%</p> <p>Enriched population: No</p> <p>PLB-responders withdrawn: Not relevant</p> <p>BPRS-total mean (SD) at BL:</p> <ul style="list-style-type: none"> <li>- Zotepine: 49.8 (13.1)</li> <li>- PLB: 48.4 (11.6)</li> </ul> <p>Completed the study: Not relevant</p> <p>LOCF/ITT-population: Yes</p> | <p>Zotepine 300 mg/d (n=61) vs PLB (n=58)</p> <p>Administration: T.i.d.</p> <p>Dose titration: Zotepine 150mg/d initially and increased to 300mg/d over the first 4 days.</p> <p>Fixed doses: If the dose level was not tolerated the daily dose could be reduced to 150mg/d of zotepine or placebo equivalent.</p> <p>Allowed supplemental medication:</p> <ul style="list-style-type: none"> <li>- Benzodiazepine as hypnotics</li> </ul>                | <p>Primary:</p> <ul style="list-style-type: none"> <li>- Time to recurrence</li> </ul> <p>Secondary:</p> <ul style="list-style-type: none"> <li>- BPRS</li> <li>- CGI-S</li> <li>- CGI-I</li> <li>- SANS</li> </ul> <p>Follow up (week): 2, 4, 8, 16, 20, 26</p> <p>Interrater reliability: Training sessions chaired by a psychiatrist experienced in the use of the scales. No <math>\kappa</math>-value.</p> |

|                        |                                                                                                                                                                                                                                                                                                                                                                                                                                                                                                                                                                                                                                                                                                                                                                                                                                                                                                                                                                                                                                                                                                                                                                                                                                             |                                                                                                                                                                                                                                                                                                                                                                                                                                                                                                                                            |                                                                                                                                                                                                                                                                                                                                                                                                                                                                                                                                                                                                                        |                                                                                                                                                                                                                                                                                                                                                                                                         |
|------------------------|---------------------------------------------------------------------------------------------------------------------------------------------------------------------------------------------------------------------------------------------------------------------------------------------------------------------------------------------------------------------------------------------------------------------------------------------------------------------------------------------------------------------------------------------------------------------------------------------------------------------------------------------------------------------------------------------------------------------------------------------------------------------------------------------------------------------------------------------------------------------------------------------------------------------------------------------------------------------------------------------------------------------------------------------------------------------------------------------------------------------------------------------------------------------------------------------------------------------------------------------|--------------------------------------------------------------------------------------------------------------------------------------------------------------------------------------------------------------------------------------------------------------------------------------------------------------------------------------------------------------------------------------------------------------------------------------------------------------------------------------------------------------------------------------------|------------------------------------------------------------------------------------------------------------------------------------------------------------------------------------------------------------------------------------------------------------------------------------------------------------------------------------------------------------------------------------------------------------------------------------------------------------------------------------------------------------------------------------------------------------------------------------------------------------------------|---------------------------------------------------------------------------------------------------------------------------------------------------------------------------------------------------------------------------------------------------------------------------------------------------------------------------------------------------------------------------------------------------------|
| Moller et al. 2004[36] | <p>RCT, DB, PLB-controlled, parallel group trial</p> <p>Duration: 8 weeks</p> <p>Run-in period:</p> <ul style="list-style-type: none"> <li>- Pre baseline washout: Yes (for oral neuroleptic 5 halftimes and depot medication two injection intervals)</li> <li>- Pre study trial-drug phase: No</li> </ul> <p>Inclusion criteria:</p> <ul style="list-style-type: none"> <li>- ICD-10: Schizophrenia, residual type</li> <li>- Stable symptomatic condition the last 6 months prior to enrollment</li> <li>- Not received neuroleptic treatment for symptom suppression the last 6 months, but only administrated for relapse prevention</li> <li>- A score of <math>\geq 3</math> on 3 items of PANSS-negative subscale</li> <li>- A score of <math>\leq 3</math> on <math>\leq 2</math> items of the PANSS-positive subscale</li> <li>- A score of <math>&gt;3</math> on the item "blunted affect" and a score of <math>&gt;3</math> on item "Lack of spontaneity and flow of conversation" of the PANSS-negative subscale</li> <li>- MADRS <math>&lt;20</math></li> <li>- EPS <math>&lt;1.0</math></li> </ul> <p>Substance abuse allowed: No</p> <p>Hospitalization: NSPEC</p> <p>Must meet inclusion criteria after washout: NSPEC</p> | <p>Randomized, N= 85</p> <p>Age, mean (SD), years:</p> <ul style="list-style-type: none"> <li>- Zotepine: 39.8 (11.9)</li> <li>- PLB: 42.2 (9.9)</li> </ul> <p>Sex, male: 53.2%</p> <p>Enriched population: No</p> <p>PLB-responders withdrawn: Yes, if <math>\geq 25\%</math> decrease in PANSS-total from screening to BL.</p> <p>PANSS-total mean (SD) at BL:</p> <ul style="list-style-type: none"> <li>- Zotepine: 81.2 (13.9)</li> <li>- PLB: 77.6 (10.9)</li> </ul> <p>Completed the study: 74%</p> <p>LOCF/ITT-population: Yes</p> | <p>Zotepine (n=38) vs PLB (n=41)</p> <p>Administration: Once daily</p> <p>Dosage, mean (SD): 131 (49) mg/day (range 25-225 mg)</p> <p>Dose titration: Initial zotepine dose was 25mg or 50mg/d and the maximum dose was 225 mg/d. The dose was increased by <math>\leq 100</math>mg/week if necessary, according to the investigator.</p> <p>Fixed doses: No</p> <p>Allowed supplemental medication:</p> <ul style="list-style-type: none"> <li>- Chloral hydrate <math>\leq 2</math> g or promethiazine 50 mg for sleep difficulties</li> <li>- Biperiden for Parkinson disease</li> <li>- Mild analgesics</li> </ul> | <p>Primary:</p> <ul style="list-style-type: none"> <li>- PANSS-negative subscale</li> </ul> <p>Secondary:</p> <ul style="list-style-type: none"> <li>- PANSS-total</li> <li>- PANSS-positive subscale</li> <li>- PANSS general psychopathology</li> <li>- MADRS</li> <li>- CGI</li> </ul> <p>Follow up (week): 1, 2, 3, 4, 6, 8</p> <p>Interrater reliability: NSPEC. No <math>\kappa</math>-value.</p> |
|------------------------|---------------------------------------------------------------------------------------------------------------------------------------------------------------------------------------------------------------------------------------------------------------------------------------------------------------------------------------------------------------------------------------------------------------------------------------------------------------------------------------------------------------------------------------------------------------------------------------------------------------------------------------------------------------------------------------------------------------------------------------------------------------------------------------------------------------------------------------------------------------------------------------------------------------------------------------------------------------------------------------------------------------------------------------------------------------------------------------------------------------------------------------------------------------------------------------------------------------------------------------------|--------------------------------------------------------------------------------------------------------------------------------------------------------------------------------------------------------------------------------------------------------------------------------------------------------------------------------------------------------------------------------------------------------------------------------------------------------------------------------------------------------------------------------------------|------------------------------------------------------------------------------------------------------------------------------------------------------------------------------------------------------------------------------------------------------------------------------------------------------------------------------------------------------------------------------------------------------------------------------------------------------------------------------------------------------------------------------------------------------------------------------------------------------------------------|---------------------------------------------------------------------------------------------------------------------------------------------------------------------------------------------------------------------------------------------------------------------------------------------------------------------------------------------------------------------------------------------------------|

*B.i.d.= bis in die (twice a day), BL = Baseline (day 0), BMI = Body Mass Index, BPRS = Brief Psychiatric Rating Scale, CDSS= Calgary Depression Scale for Schizophrenia, CGI = Clinical Global Impression, DB = Double blinded, DSM = Diagnostic and Statistical Manual of Mental Disorders, EPS=Extrapyrarnidal Symptoms, ER = Extended release, HAM-A = Hamilton Anxiety Scale, HAM-D-17= Hamilton Rating Scale for Depression, ICD-10 = International Classification of Diseases, IR = immediate release, ITT = Intention To Treat, LAI =Long-Acting Injection , LOCF = Last Observation Carried Forward, MADRS= Montgomery-Åsberg Depression Rating Scale, N= randomized patients, n=ITT-population, NOSIE = Nurses Observation Scale for Inpatient Evaluation, NSA-16= Negative Symptom Assessment, NSPEC = non specified, PDS = Psychotic Depression Scale, PGI= Patient's Global Impression Scores, PLB = Placebo, PANSS = Positive And Negative Syndrome Scale, PSP = Personal and Social Performance scale, QWB-SA= Quality of Well-being Scale, RCT = Randomized Controlled Trial, SANS =Scale for the Assessment of Negative Symptom, SD=standard deviation, SE = Standard error, T.i.d. = Ter in die (three times a day), XR = extended release.*

## Supplemental 4 – Risk of Bias Assessment

Illustrates the Risk of bias assessment using “A Revised Cochrane risk of bias tool for randomized trials, ROB2” [37]

D1 Randomisation process

D2 Deviations from the intended interventions

D3 Missing outcome data

D4 Measurement of the outcome

D5 Selection of the reported result

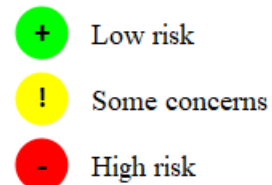

| <u>Unique ID</u>     | <u>Experimental</u>        | <u>Outcome</u> | <u>D1</u> | <u>D2</u> | <u>D3</u> | <u>D4</u> | <u>D5</u> | <u>Overall</u> |
|----------------------|----------------------------|----------------|-----------|-----------|-----------|-----------|-----------|----------------|
| Potkin 2007          | Asenapine, SL              | PANSS          |           |           |           |           |           |                |
| Kane 2010            | Asenapine, SL              | PANSS          |           |           |           |           |           |                |
| Kinoshita 2016       | Asenapine, SL              | PANSS          |           |           |           |           |           |                |
| Landbloom 2017       | Asenapine, SL + Olanzapine | PANSS          |           |           |           |           |           |                |
| Citrome 2020         | Asenapine, TDD             | PANSS          |           |           |           |           |           |                |
| Lecrubier 2006       | Olanzapine                 | PANSS          |           |           |           |           |           |                |
| Meltzer 2011         | Olanzapine                 | PANSS          |           |           |           |           |           |                |
| Beasley 1996_1       | Olanzapine                 | BPRS           |           |           |           |           |           |                |
| Beasley 1996_2       | Olanzapine                 | PANSS          |           |           |           |           |           |                |
| Corrigan 2004        | Olanzapine                 | PANSS          |           |           |           |           |           |                |
| Marder 2007          | Olanzapine                 | PANSS          |           |           |           |           |           |                |
| Schmidt 2012         | Olanzapine                 | PANSS          |           |           |           |           |           |                |
| Bugarski-Kirola 2014 | Olanzapine                 | PANSS          |           |           |           |           |           |                |
| Shen 2014            | Olanzapine                 | PANSS          |           |           |           |           |           |                |
| Davidson 2007        | Olanzapine                 | PANSS          |           |           |           |           |           |                |
| Kane 2007            | Olanzapine                 | PANSS          |           |           |           |           |           |                |
| Potkin 2020          | Olanzapine                 | PANSS          |           |           |           |           |           |                |

|                  |                                |       |  |  |  |  |  |  |
|------------------|--------------------------------|-------|--|--|--|--|--|--|
| Egan 2013        | Olanzapine                     | PANSS |  |  |  |  |  |  |
| Kinon 2011       | Olanzapine                     | PANSS |  |  |  |  |  |  |
| Litman 2014      | Olanzapine                     | PANSS |  |  |  |  |  |  |
| Mosolov 2011     | Olanzapine                     | PANSS |  |  |  |  |  |  |
| Shen 2008        | Olanzapine                     | PANSS |  |  |  |  |  |  |
| Lauriello 2008   | Olanzapine, LAI                | PANSS |  |  |  |  |  |  |
| Fabre 1995       | Quetiapine                     | BPRS  |  |  |  |  |  |  |
| Borison 1996     | Quetiapine                     | BPRS  |  |  |  |  |  |  |
| Arvanitis 1997   | Quetiapine                     | BPRS  |  |  |  |  |  |  |
| Small 1997       | Quetiapine                     | BPRS  |  |  |  |  |  |  |
| Potkin 2006      | Quetiapine                     | PANSS |  |  |  |  |  |  |
| Canuso 2009      | Quetiapine                     | PANSS |  |  |  |  |  |  |
| Loebel 2013      | Quetiapine, XR                 | PANSS |  |  |  |  |  |  |
| Kahn 2007        | Quetiapine +<br>Quetiapine, XR | PANSS |  |  |  |  |  |  |
| Lindenmayer 2008 | Quetiapine +<br>Quetiapine, XR | PANSS |  |  |  |  |  |  |
| Cooper 2000_1    | Zotepine                       | BPRS  |  |  |  |  |  |  |
| Cooper 2000_2    | Zotepine                       | BPRS  |  |  |  |  |  |  |
| Moller 2004      | Zotepine                       | PANSS |  |  |  |  |  |  |



## Supplemental 5 – Forest plots

### Pooled meta-analyses for immediate release and transdermal drug delivery antipsychotics

Shows the forest plots of the standardized mean difference in the changes of symptom score from baseline to week 1, 2, 3, 4, 5, 6 (green squares) with a 95% CI (bars) between either sublingual asenapine, transdermal asenapine, olanzapine, quetiapine or zotepine and placebo. The black diamonds are the summary effect estimates, which forms the dots in figure 3A.

Week 1:

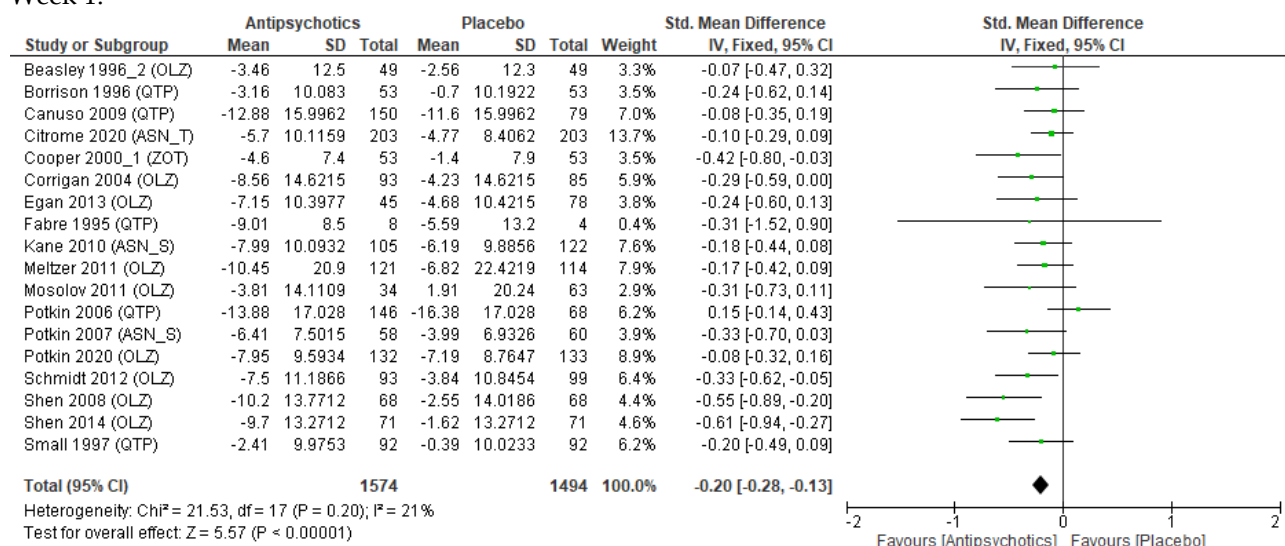

Week 2:

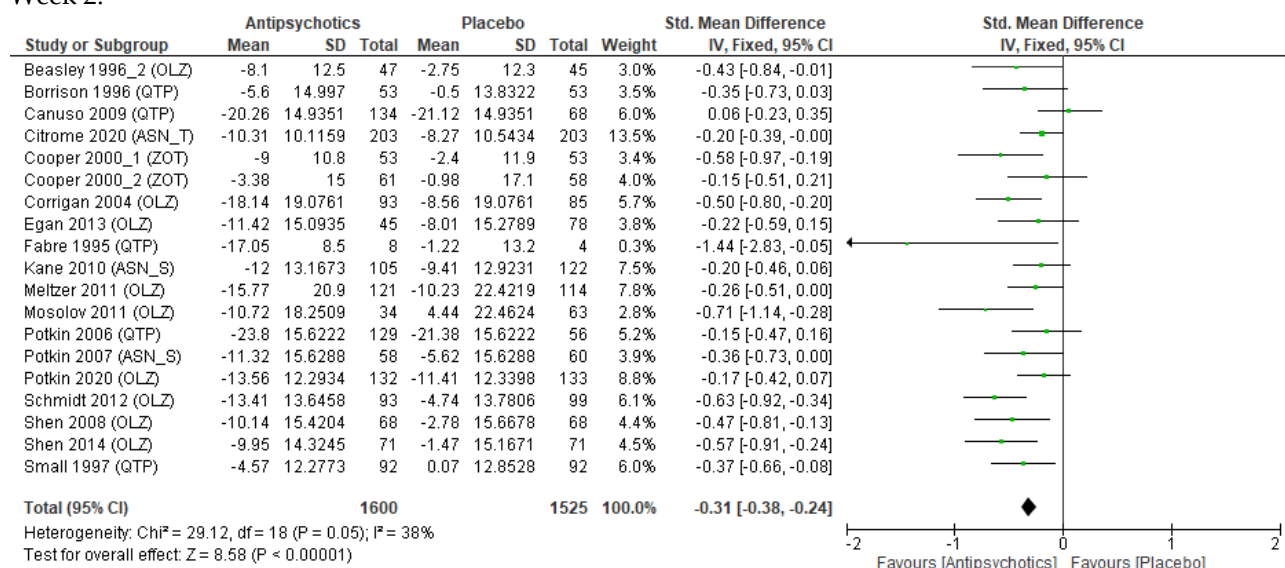

### Week 3:

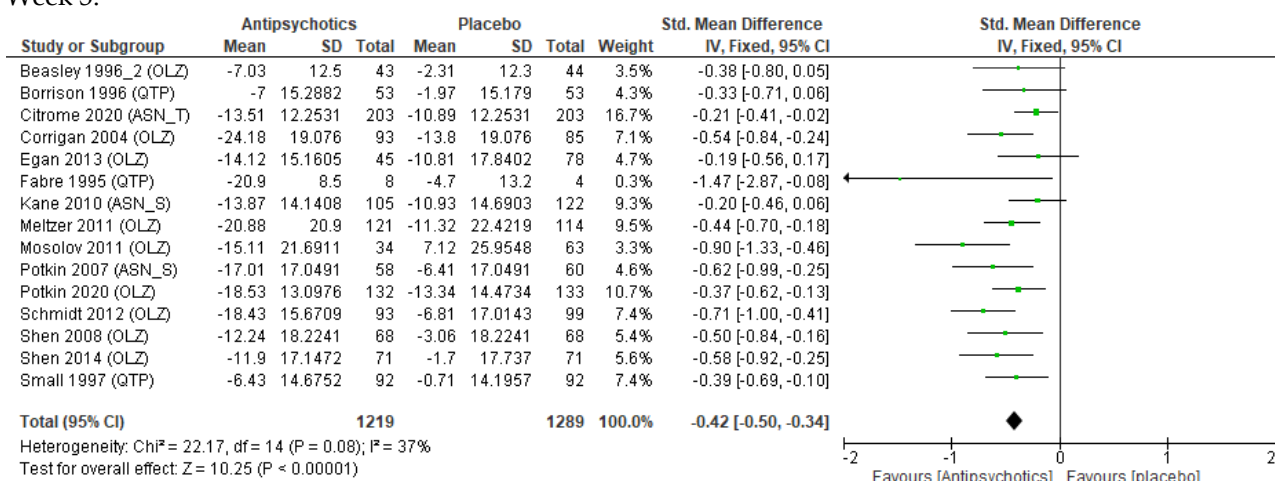

### Week 4:

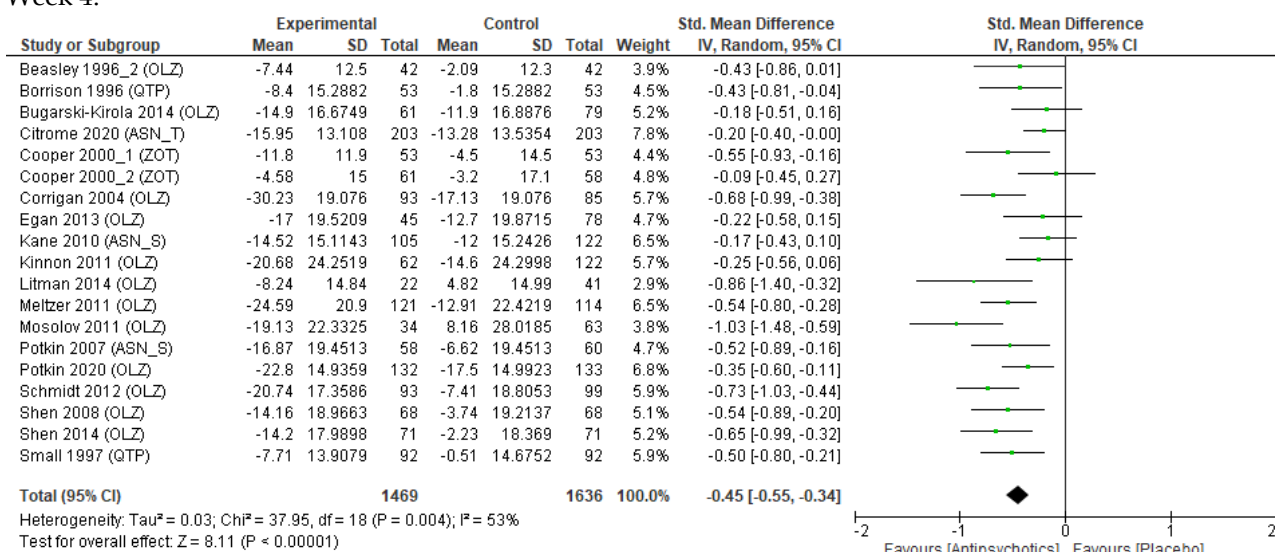

### Week 5:

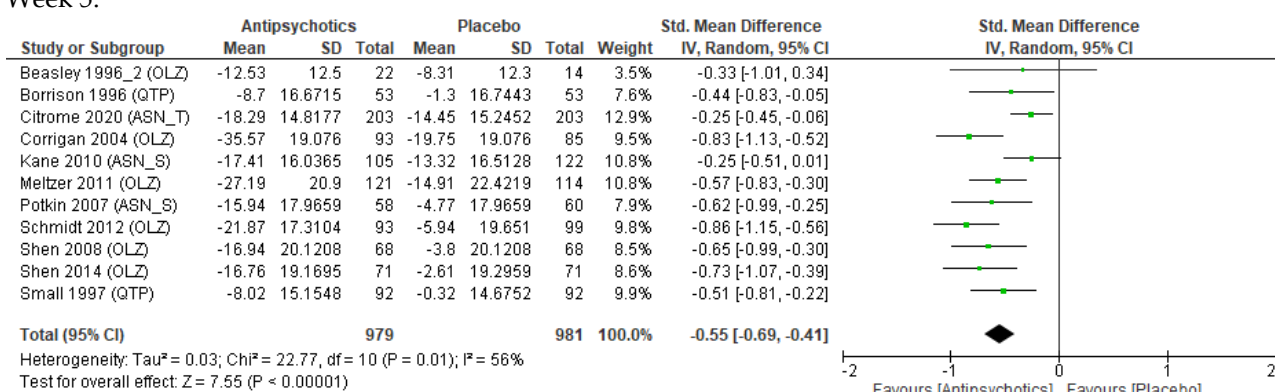

Week 6:

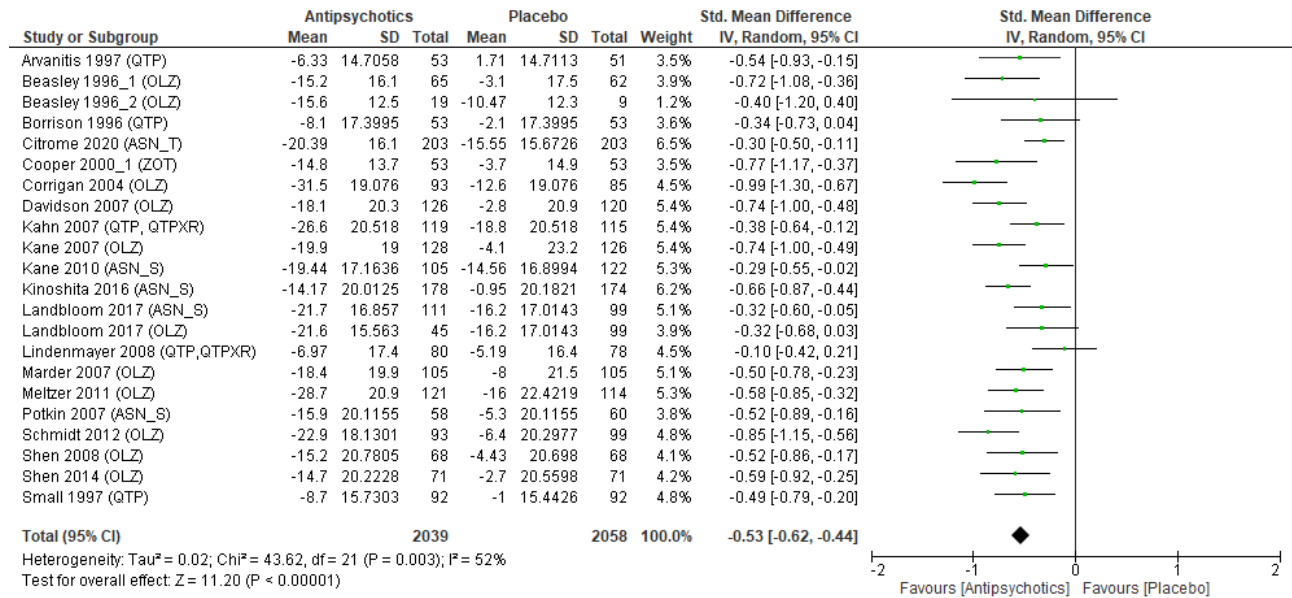

## Asenapine

Shows the forest plots of the standardized mean difference in the changes of symptom score from baseline to week 1, 2, 3, 4, 5, 6 (green squares) with a 95% CI (bars) between sublingual asenapine and placebo. The black diamonds are the summary effect estimates, which forms the dots in figure 3B.

Week 1:

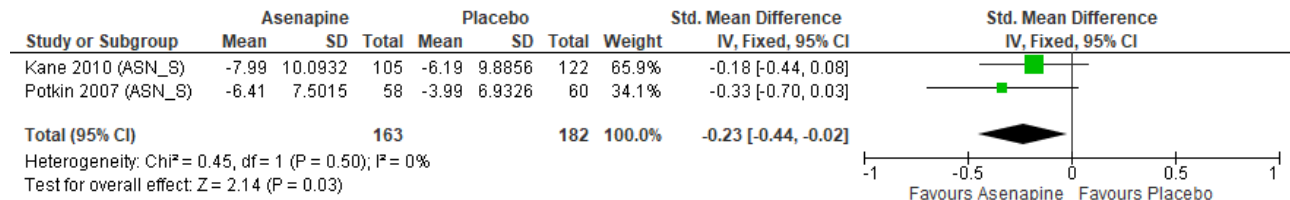

Week 2:

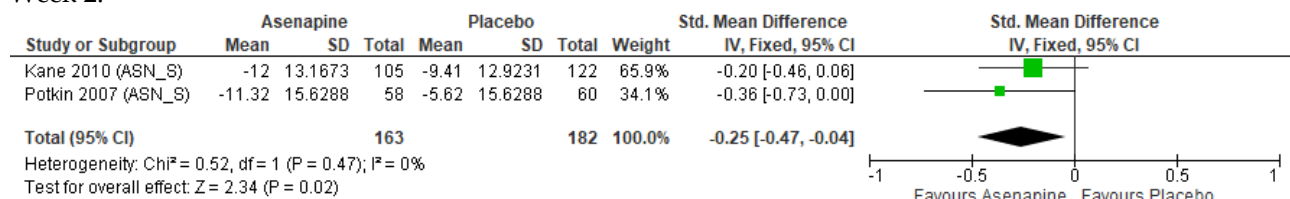

Week 3:

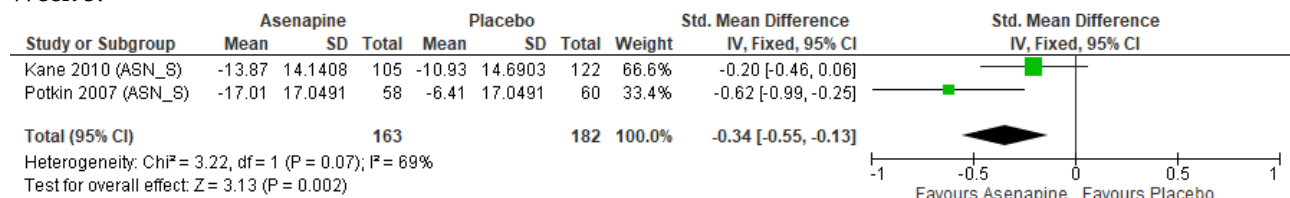

Week 4:

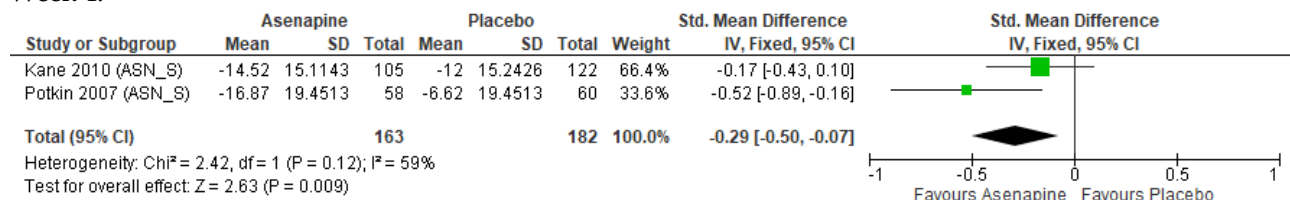

Week 5:

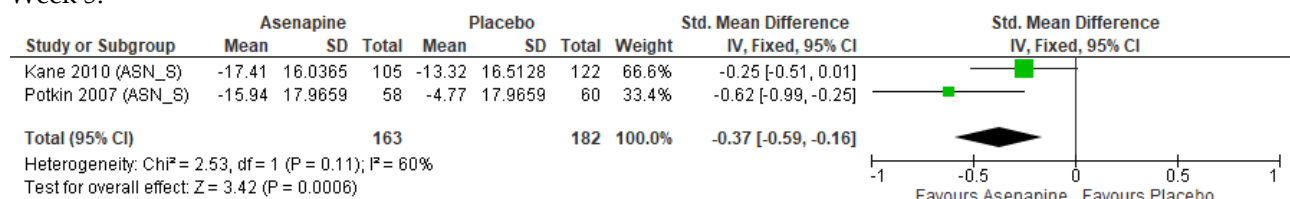

Week 6:

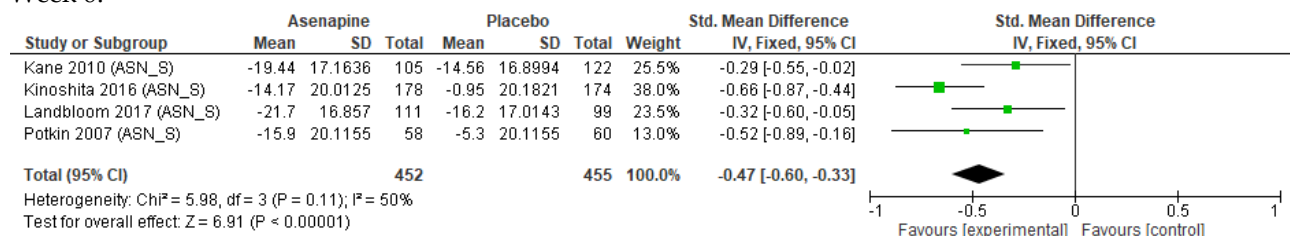

## Asenapine, transdermal

Shows the forest plots of the standardized mean difference in the changes of symptom score from baseline to week 1, 2, 3, 4, 5, 6 (green squares) with a 95% CI (bars) between transdermal asenapine and placebo. The black diamonds are the summary effect estimates, which forms the dots in figure 3C.

Week 1:

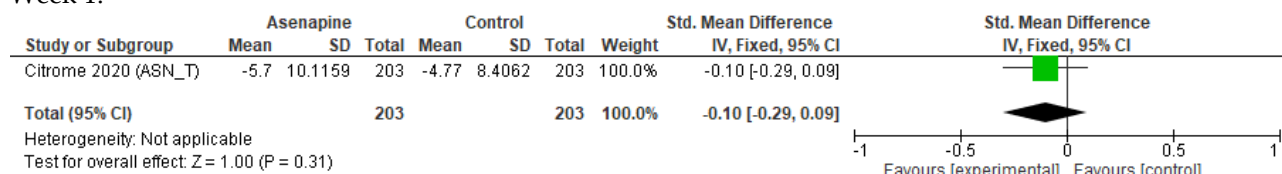

Week 2:

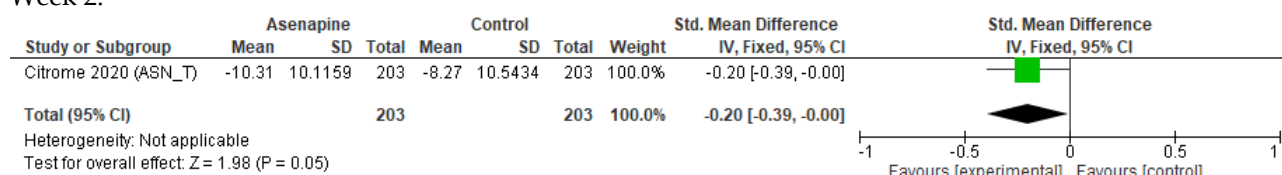

Week 3:

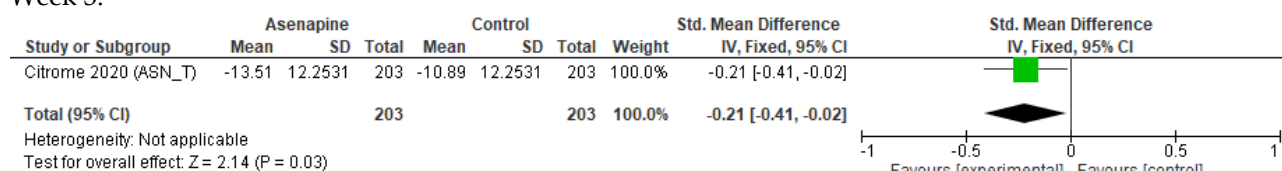

Week 4:

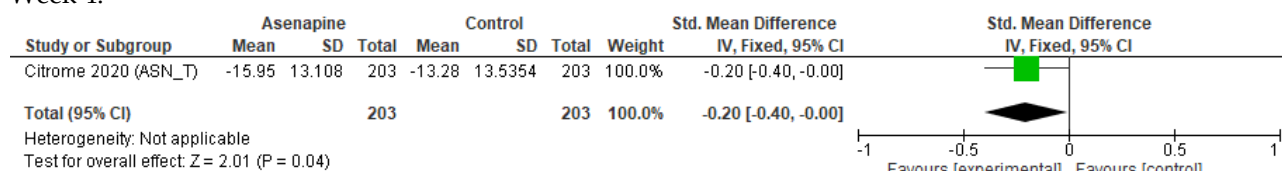

Week 5:

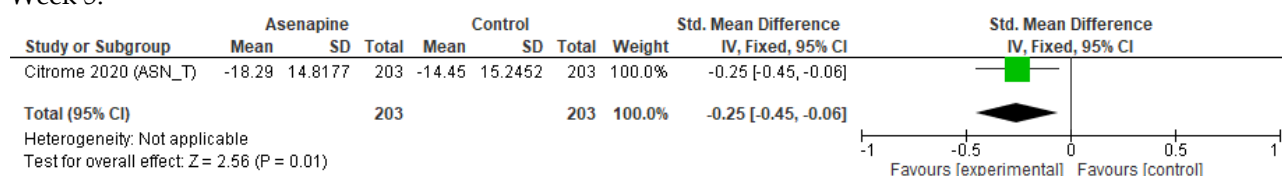

Week 6:

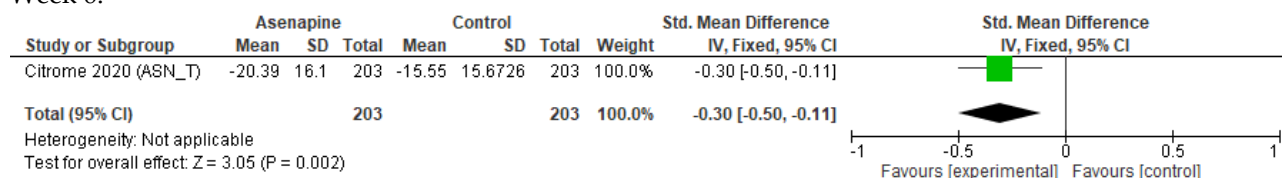

## Olanzapine

Shows the forest plots of the standardized mean difference in the changes of symptom score from baseline to week 1, 2, 3, 4, 5, 6, 26 (green squares) with a 95% CI (bars) between olanzapine and placebo. The black diamonds are the summary effect estimates, which forms the dots in figure 3D.

### Week 1:

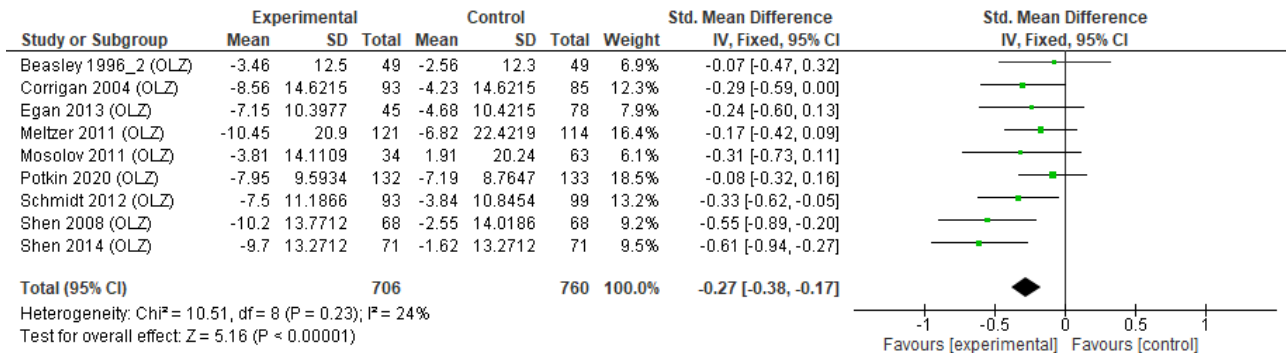

### Week 2:

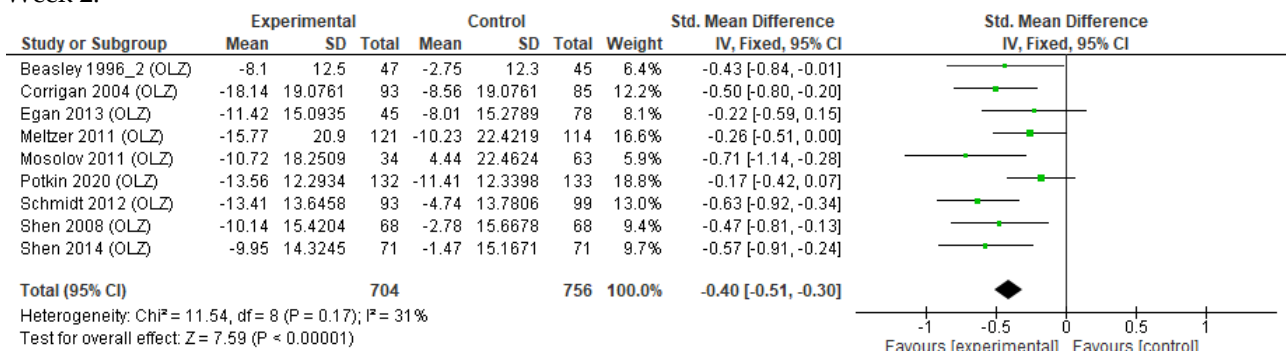

### Week 3:

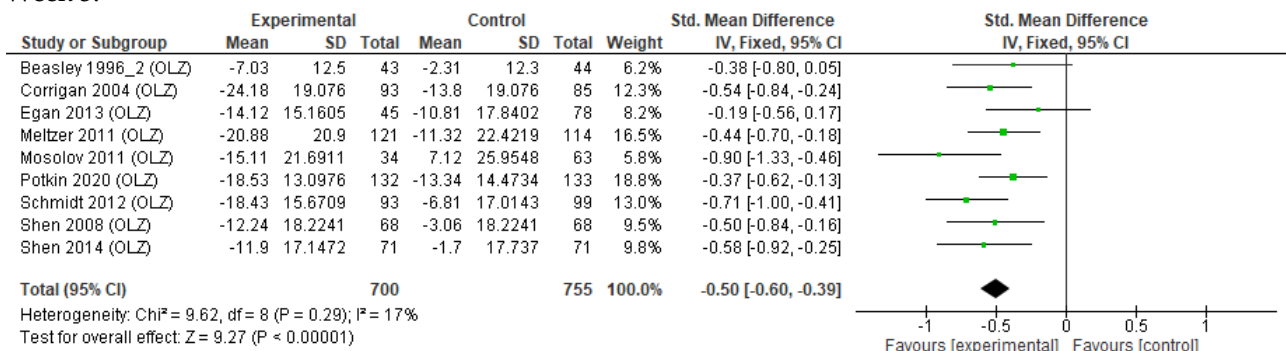

# Week 4:

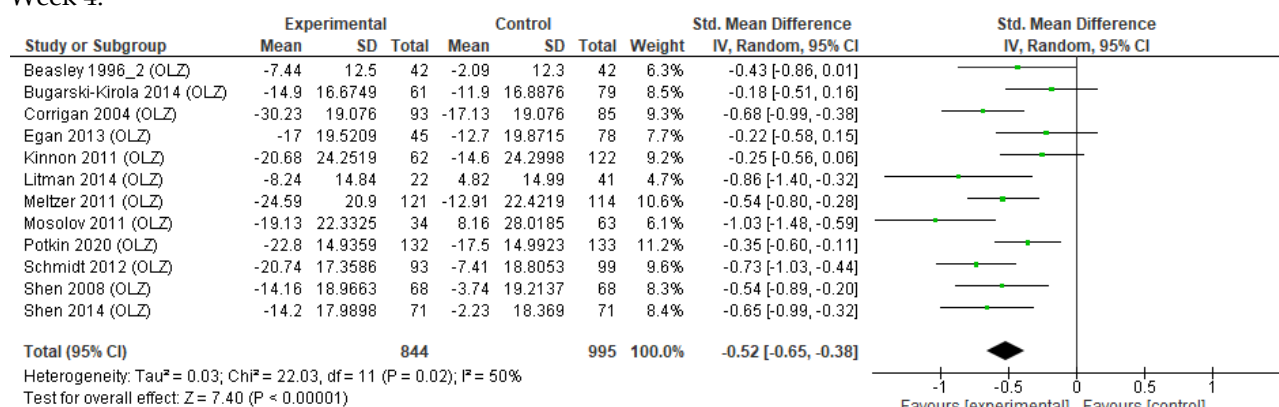

# Week 5:

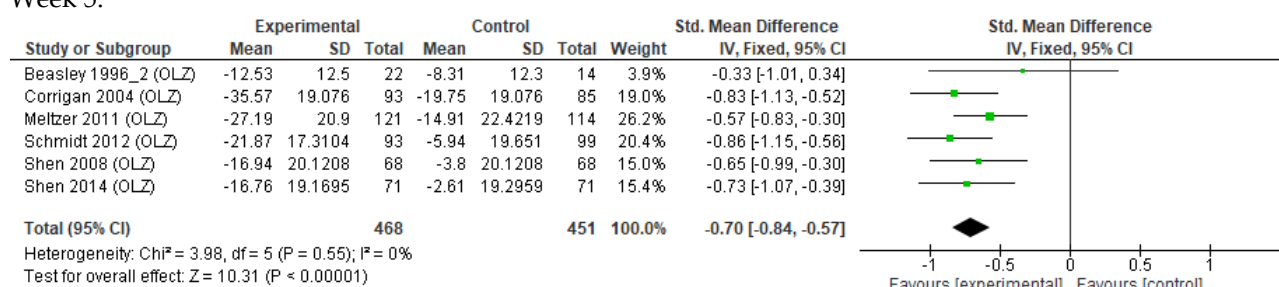

# Week 6:

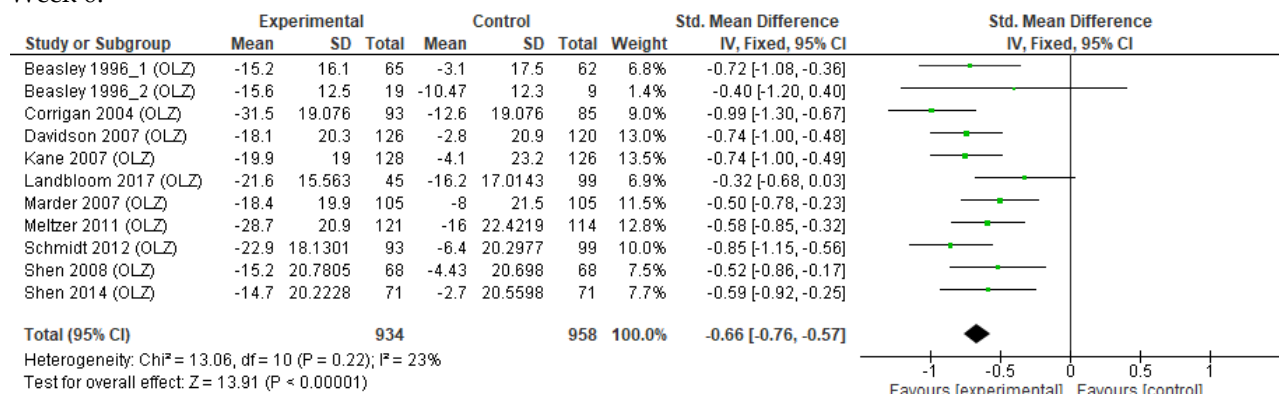

# Week 26:

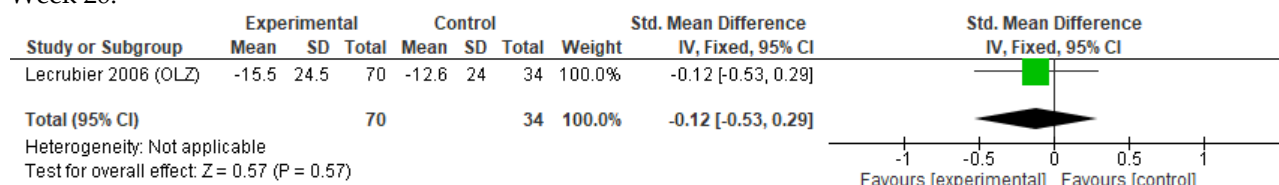



## Quetiapine

Shows the forest plots of the standardized mean difference in the changes of symptom score from baseline to week 1, 2, 3, 4, 5, 6 (green squares) with a 95% CI (bars) between quetiapine and placebo. The black diamonds are the summary effect estimates, which forms the dots in figure 3E.

### Week 1:

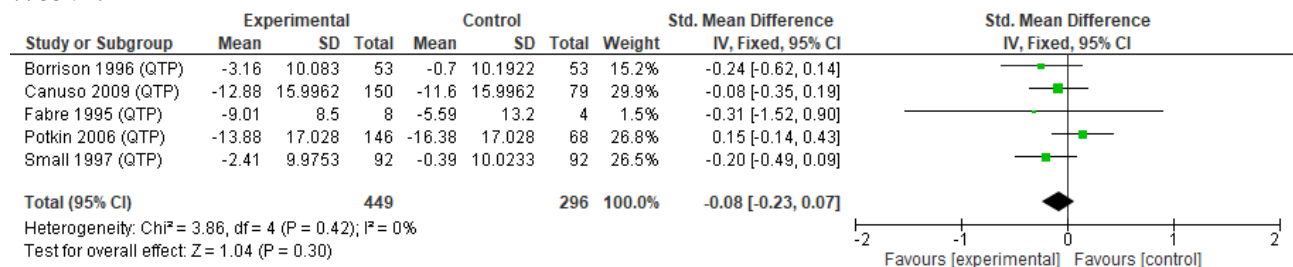

### Week 2:

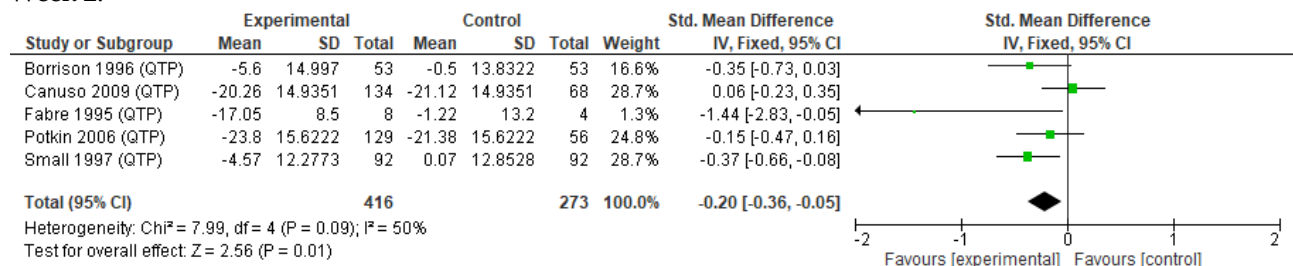

### Week 3:

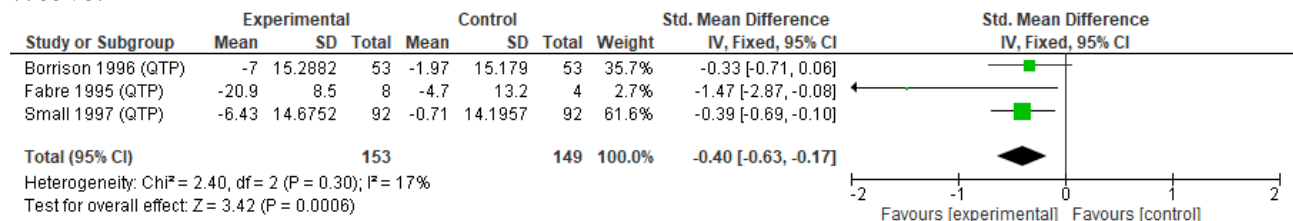

### Week 4:

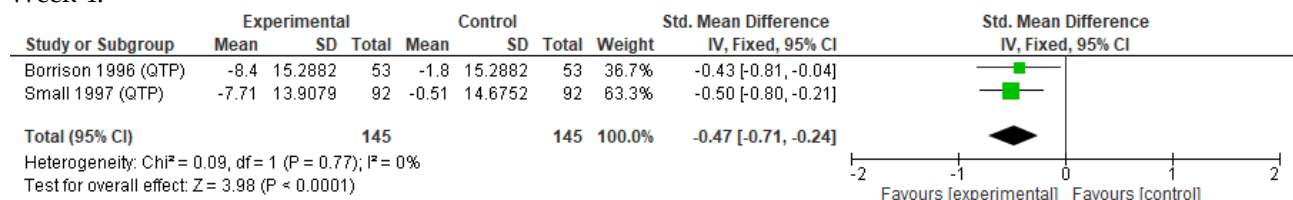

### Week 5:

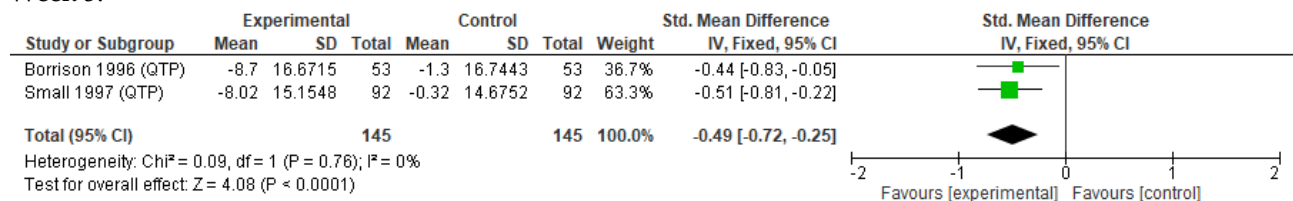



## Week 6:

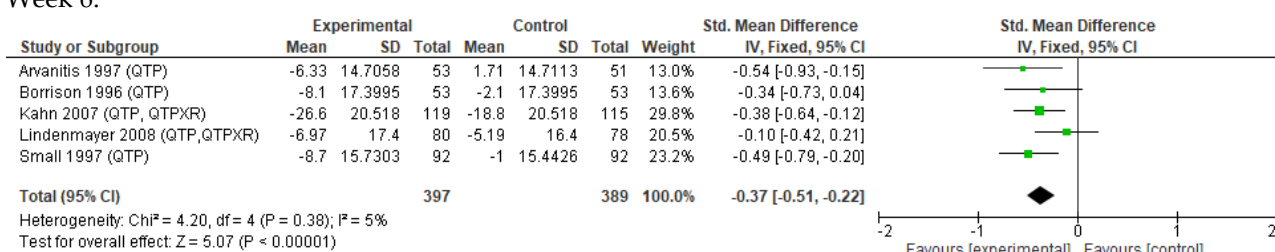

## Zotepine

Shows the forest plots of the standardized mean difference in the changes of symptom score from baseline to week 1, 2, 4, 6, 8, 16, 20, 26 (green squares) with a 95% CI (bars) between zotepine and placebo. The black diamonds are the summary effect estimates, which forms the dots in figure 3F.

### Week 1:

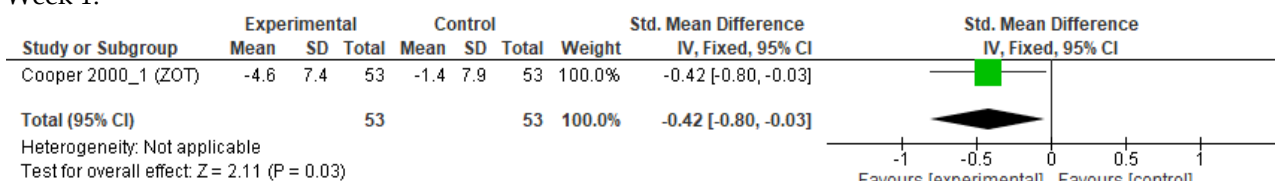

### Week 2:

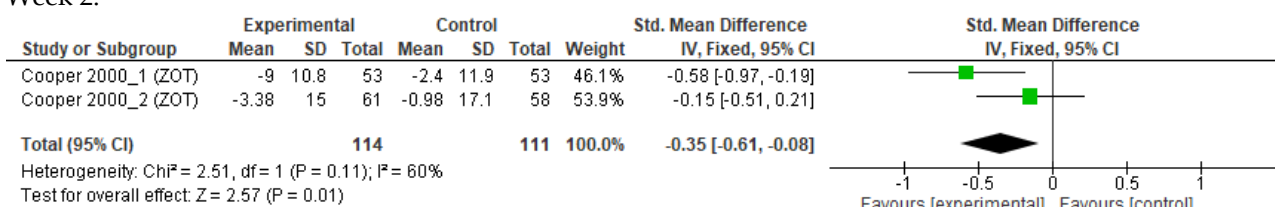

### Week 4:

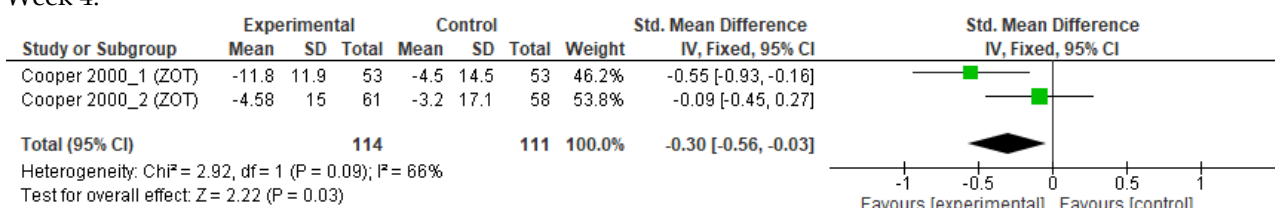

### Week 6:

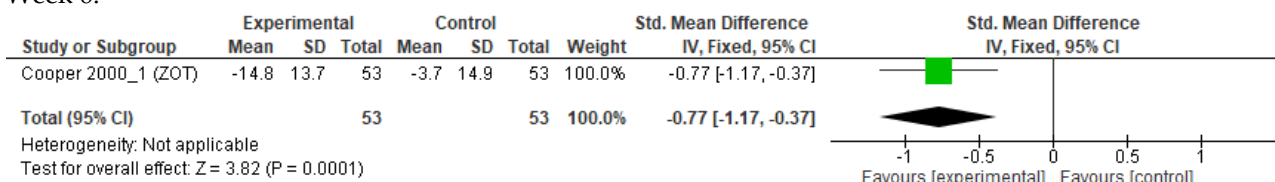

Week 8:

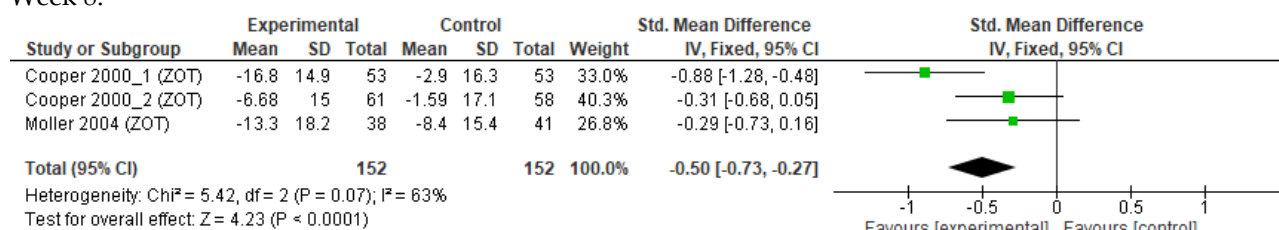

Week 16:

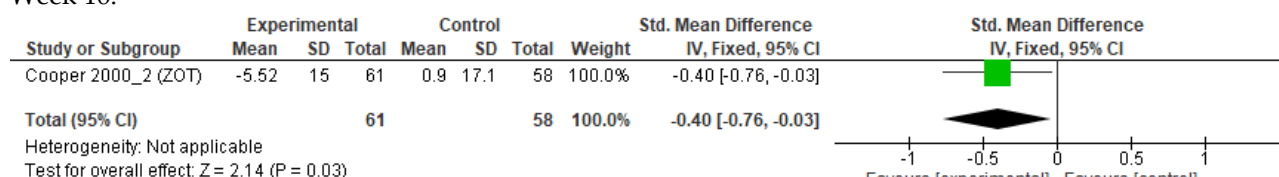

Week 20:

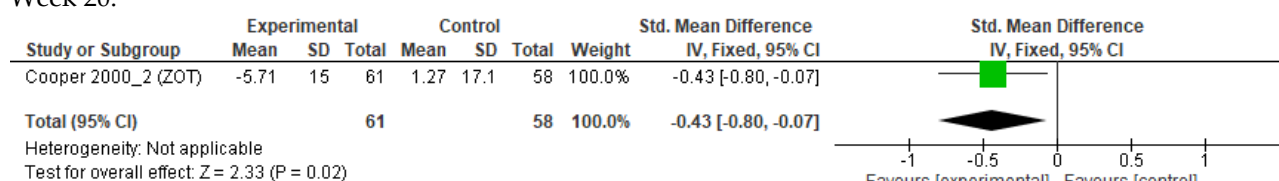

Week 26:

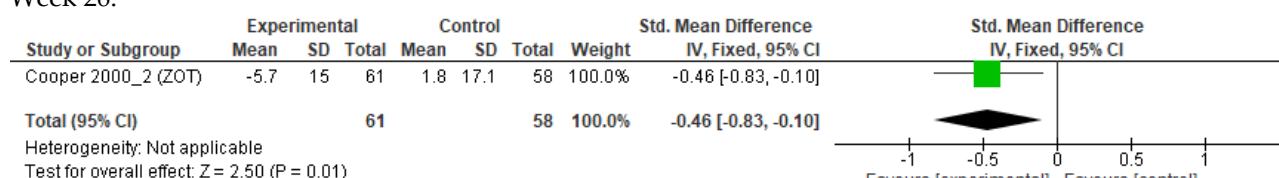

## Olanzapine, Long-acting Injections

Shows the forest plots of the standardized mean difference in the changes of symptom score from baseline to week 1, 2, 3, 4, 5, 6, 7, 8 (green squares) with a 95% CI (bars) between long acting olanzapine and placebo. The black diamonds are the summary effect estimates, which forms the dots in figure 3G.

Week 1:

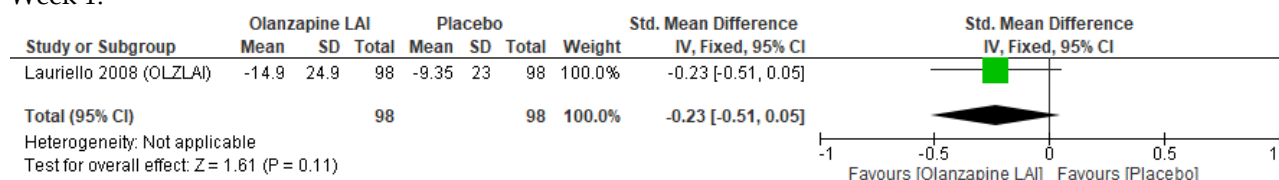

## Week 2:

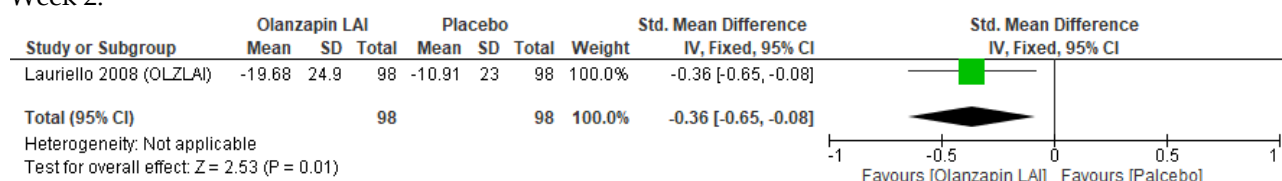

## Week 3:

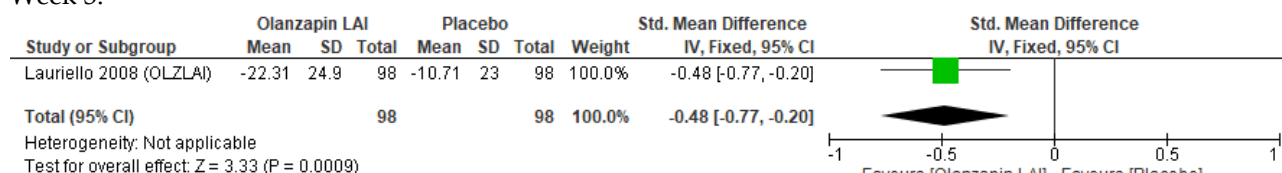

## Week 4:

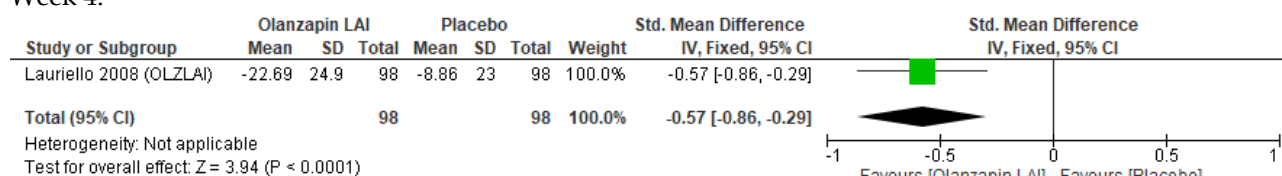

## Week 5:

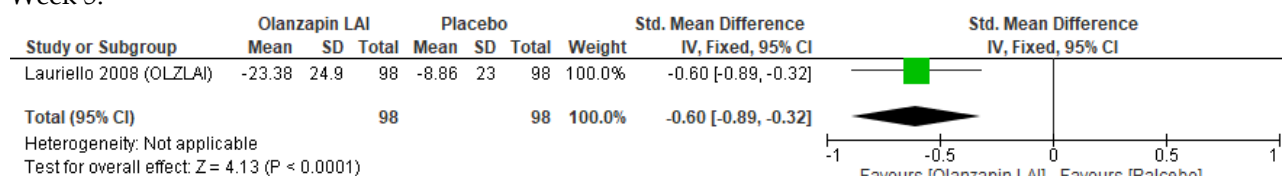

## Week 6:

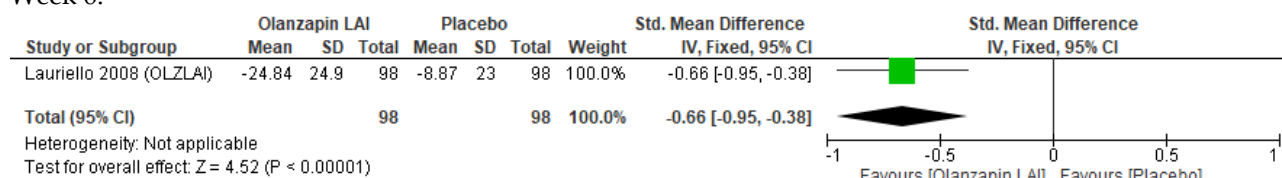

## Week 7:

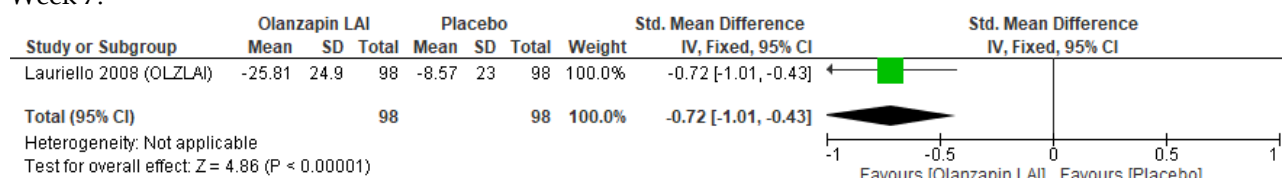

## Week 8:

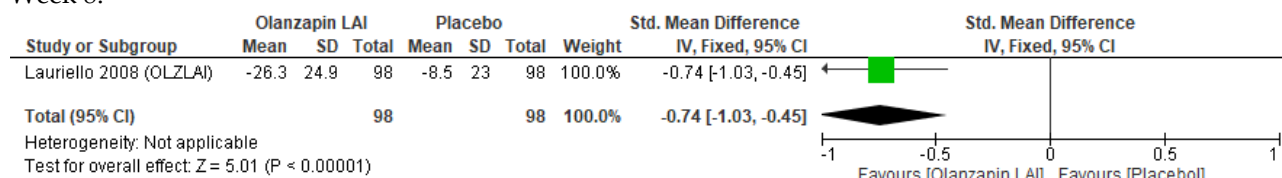

## Quetiapine, Extended Release

Shows the forest plots of the standardized mean difference in the changes of symptom score from baseline to week 1, 2, 3, 4, 5, 6 (green squares) with a 95% CI (bars) between quetiapine extended release and placebo. The black diamonds are the summary effect estimates, which forms the dots in figure 3H.

Week 1:

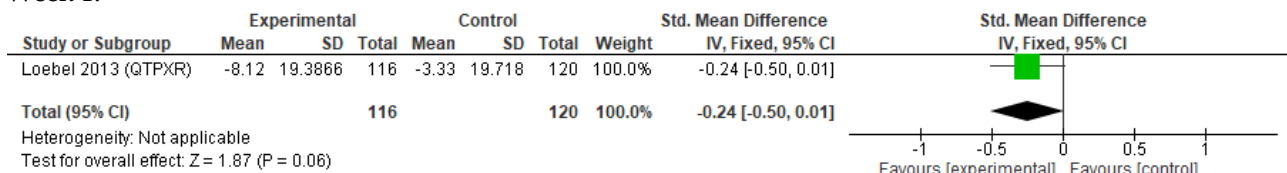

Week 2:

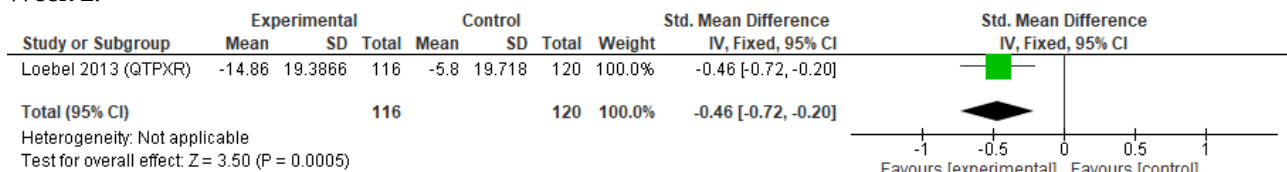

Week 3:

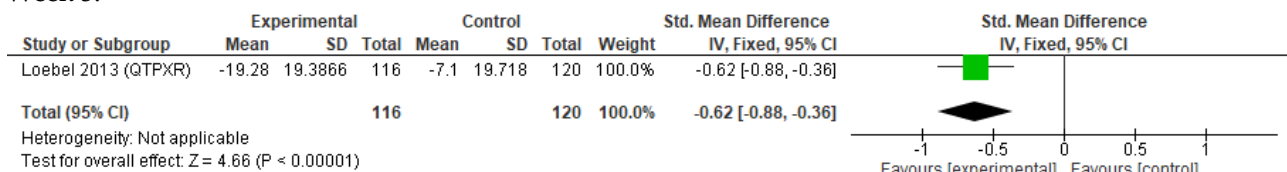

Week 4:

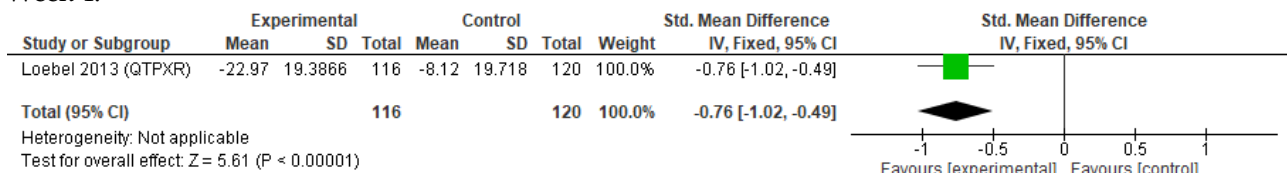

Week 5:

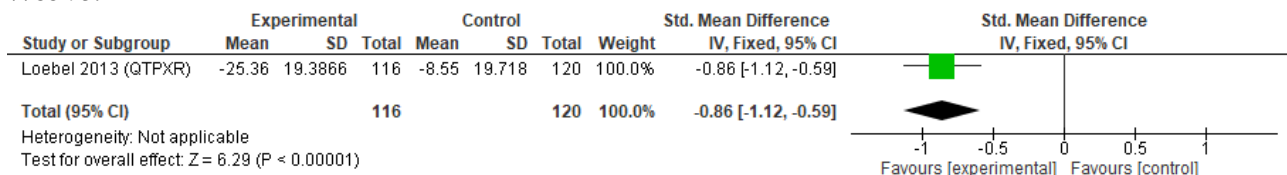

Week 6:

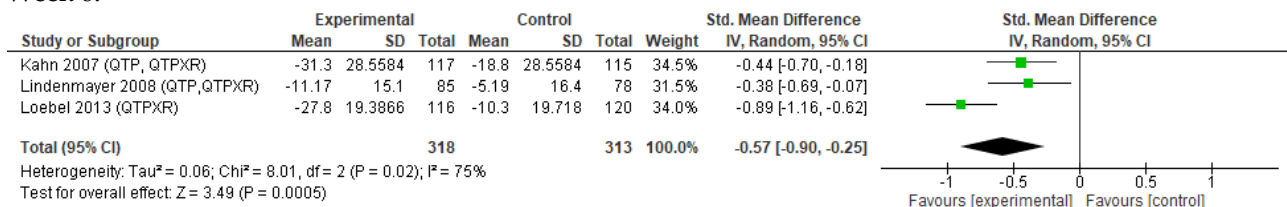

## Supplemental 6 – Sensitivity analysis, sequentially data only

### Asenapine sequentially data only

Shows the forest plots of the standardized mean difference in the changes of symptom score from baseline to week 1, 2, 3, 4, 5, 6 (green squares) with a 95% CI (bars) between asenapine and placebo. The black diamonds are the summary effect estimates. Only the sequential data are included, meaning studies that in addition to the baseline symptom score presented at least two symptom scores.

Week 1:

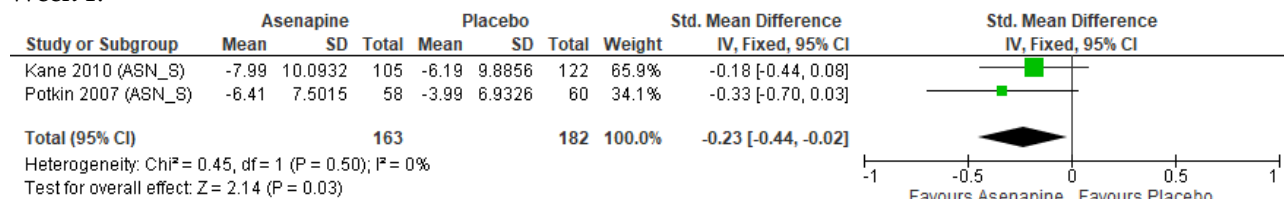

Week 2:

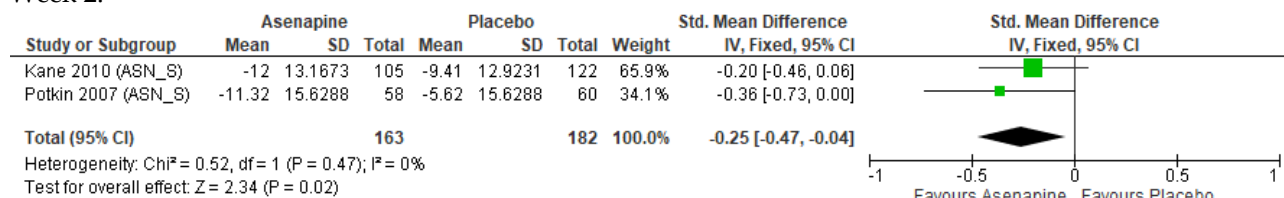

Week 3:

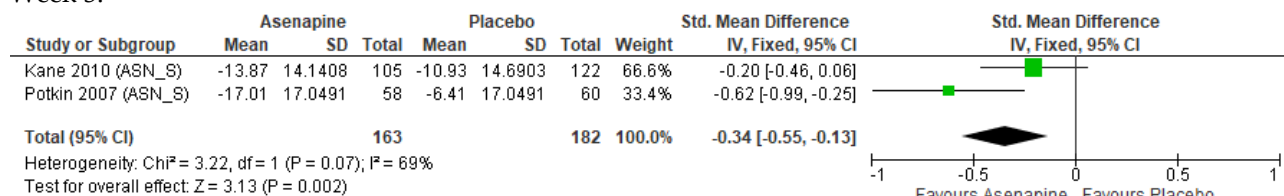

Week 4:

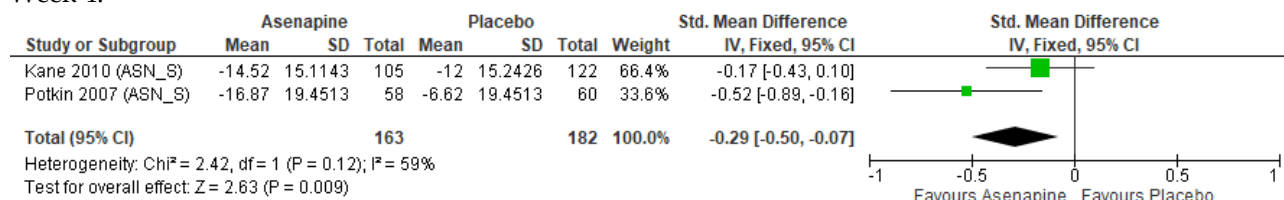

Week 5:

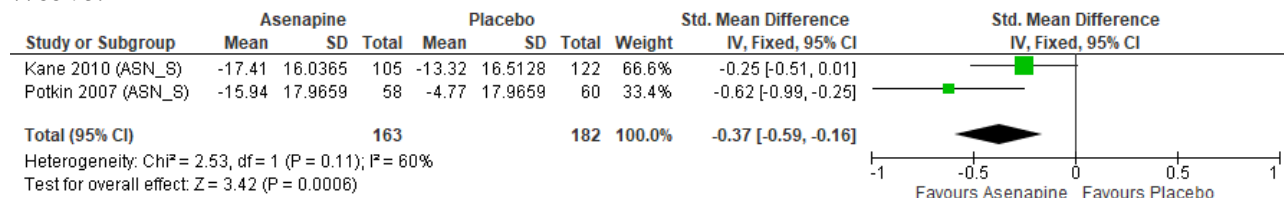

Week 6:

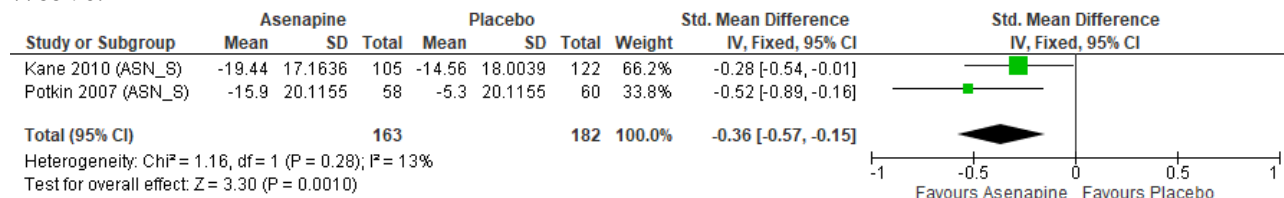

## Olanzapine sequentially data only

Shows the forest plots of the standardized mean difference in the changes of symptom score from baseline to week 1, 2, 3, 4, 5, 6 (green squares) with a 95% CI (bars) between olanzapine and placebo. The black diamonds are the summary effect estimates. Only the sequential data are included, meaning studies that in addition to the baseline symptom score presented at least two symptom scores.

### Week 1:

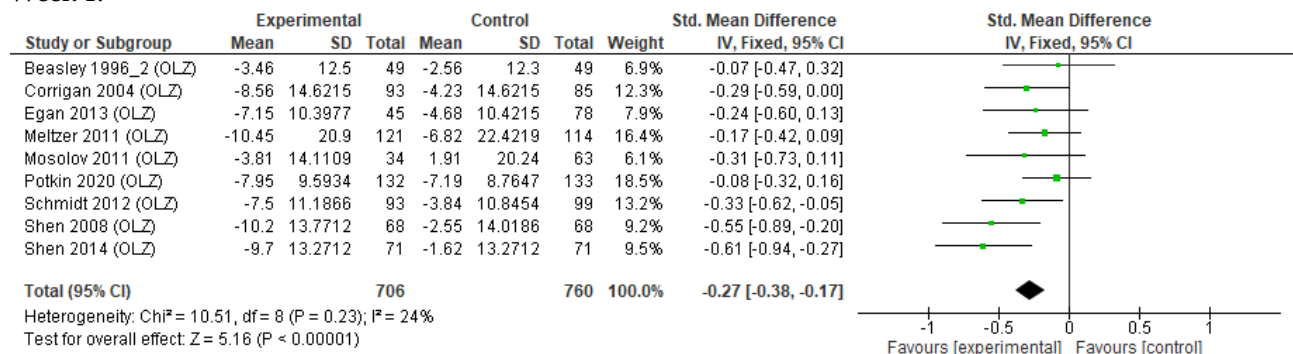

### Week 2:

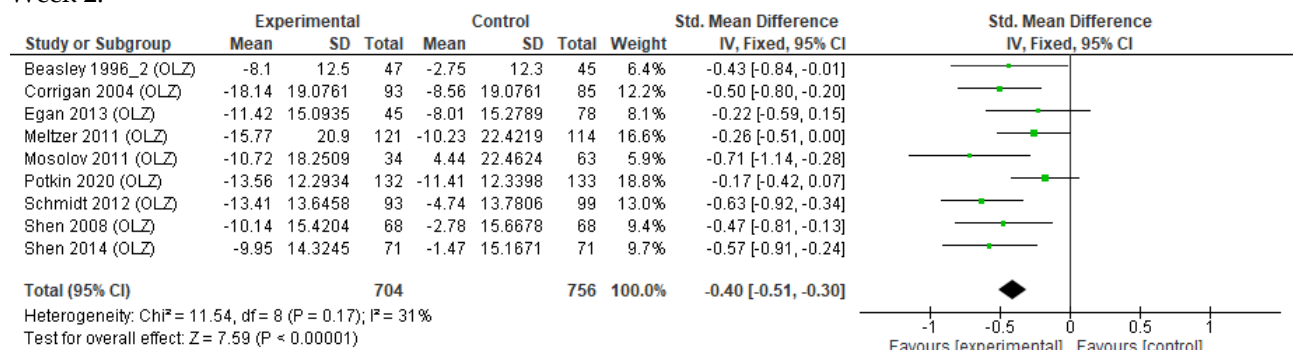

### Week 3:

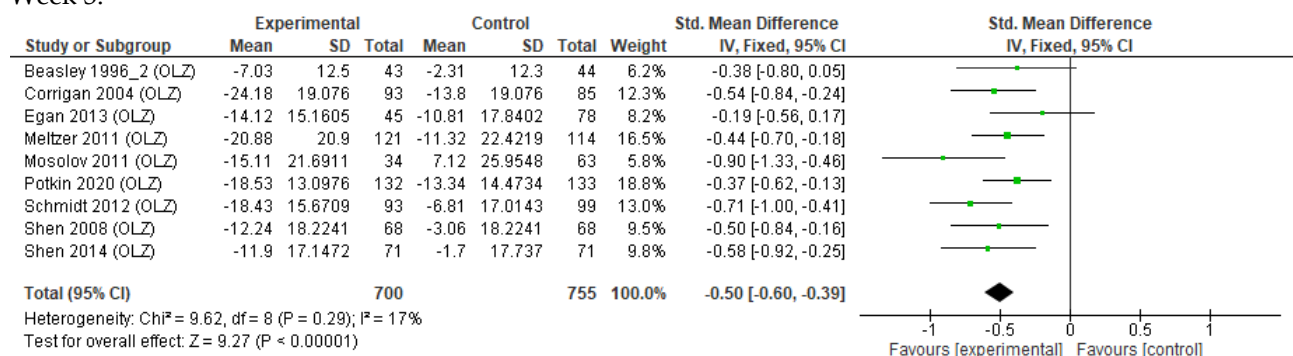



## Week 4:

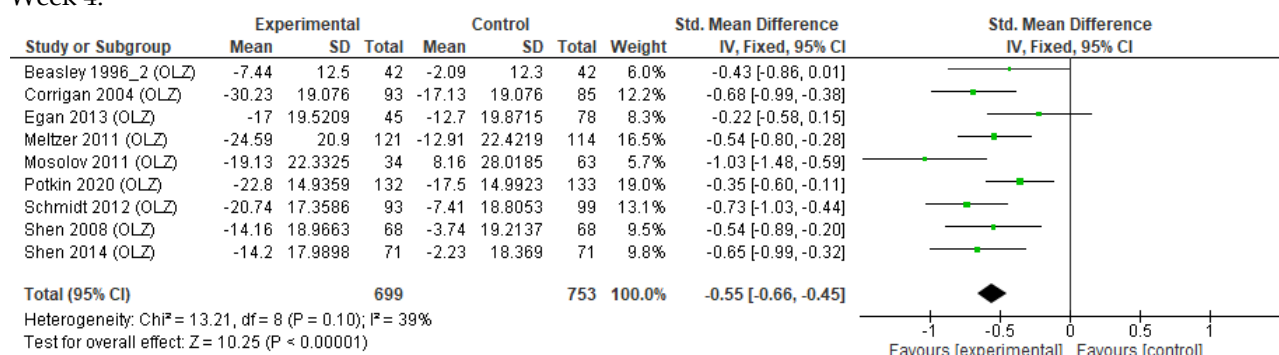

## Week 5:

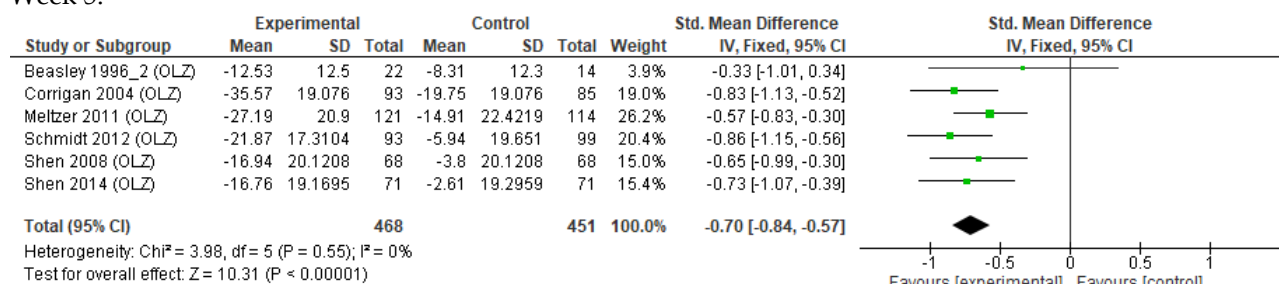

## Week 6:

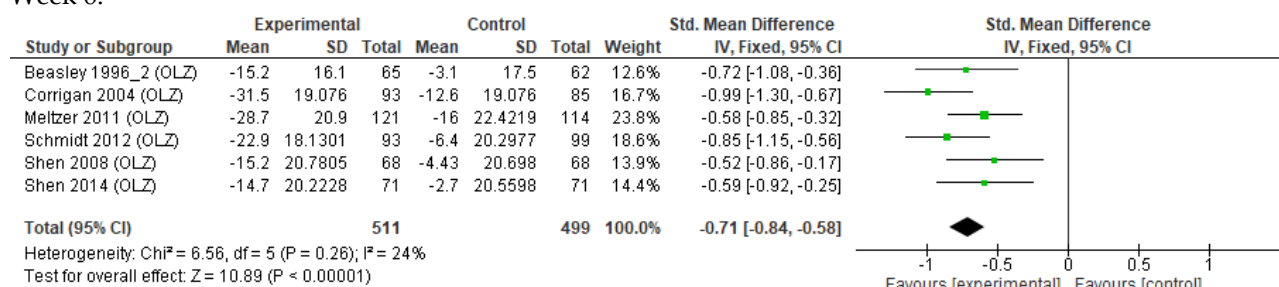

## Quetiapine sequentially data only

Shows the forest plots of the standardized mean difference in the changes of symptom score from baseline to week 1, 2, 3, 4, 5, 6 (green squares) with a 95% CI (bars) between quetiapine and placebo. The black diamonds are the summary effect estimates. Only the sequential data are included, meaning studies that in addition to the baseline symptom score presented at least two symptom scores.

## Week 1:

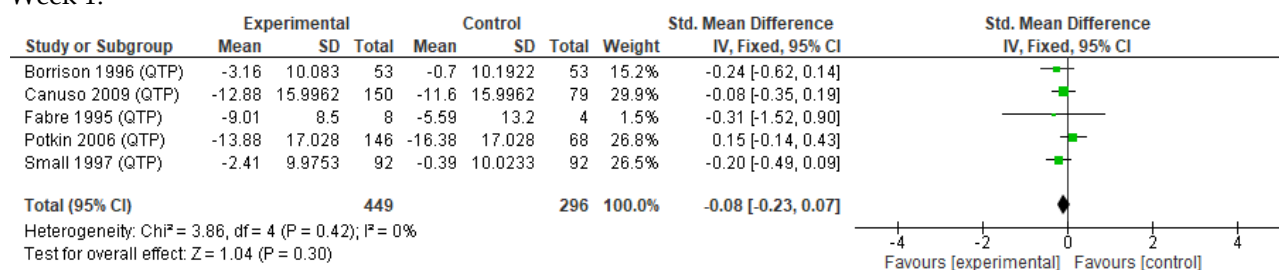

## Week 2:

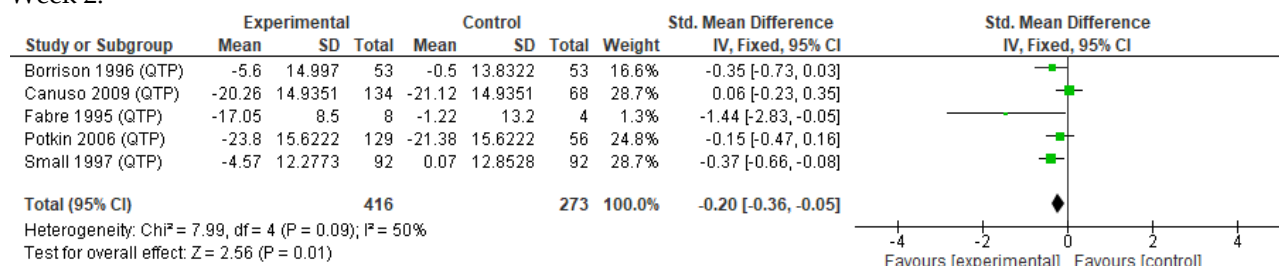

## Week 3:

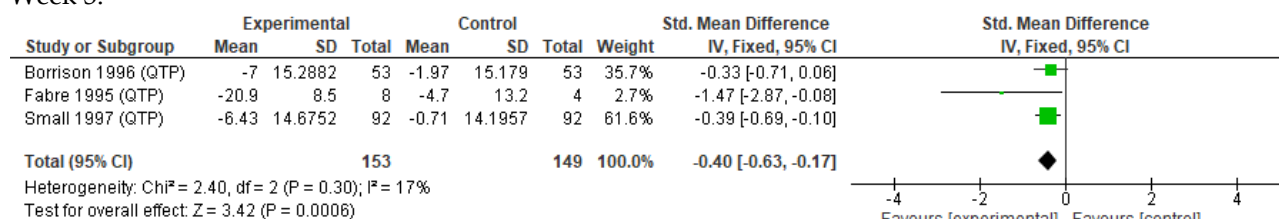

## Week 4:

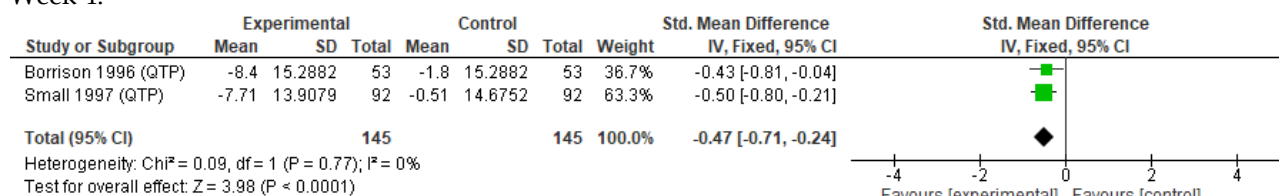

## Week 5:

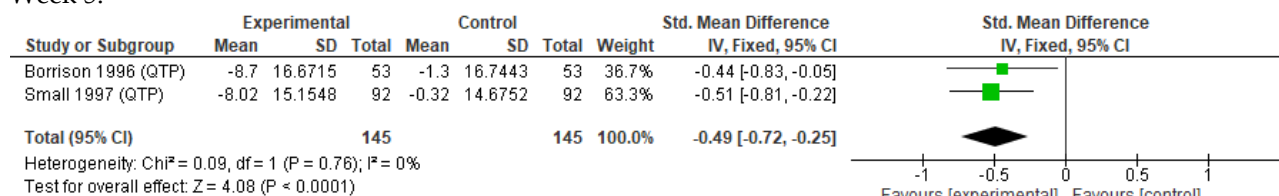

## Week 6:

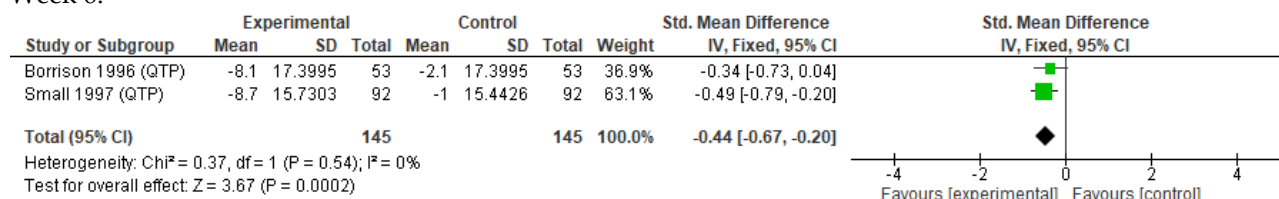



## Zotepine sequentially data only

Shows the forest plots of the standardized mean difference in the changes of symptom score from baseline to week 1, 2, 4, 6, 8, 16, 20, 26 (green squares) with a 95% CI (bars) between zotepine and placebo. The black diamonds are the summary effect estimates. Only the sequential data are included, meaning studies that in addition to the baseline symptom score presented at least two symptom scores.

### Week 1:

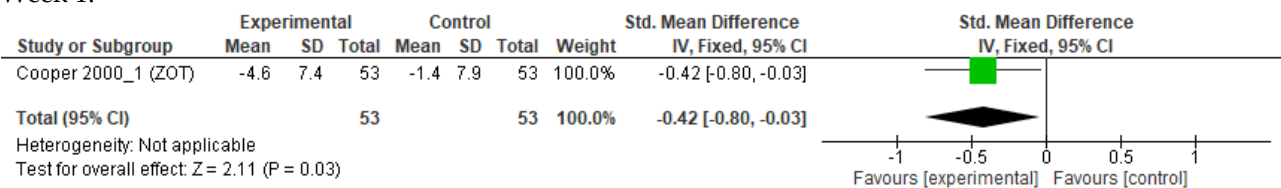

### Week 2:

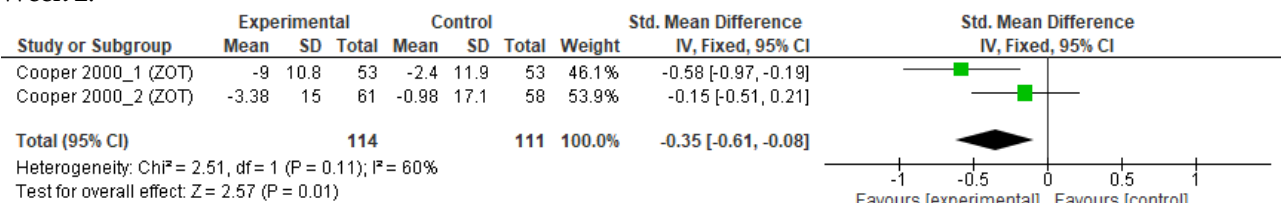

### Week 4:

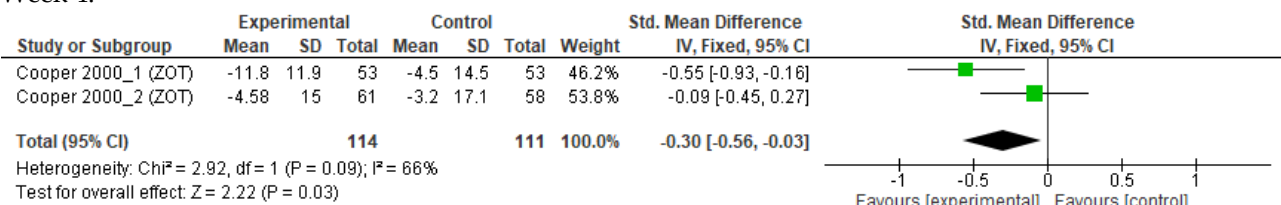

### Week 6:

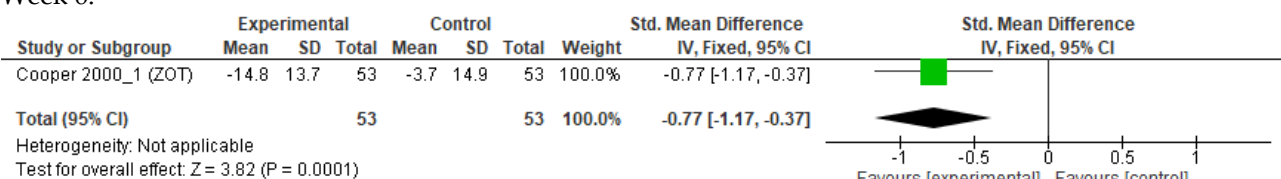

### Week 8:

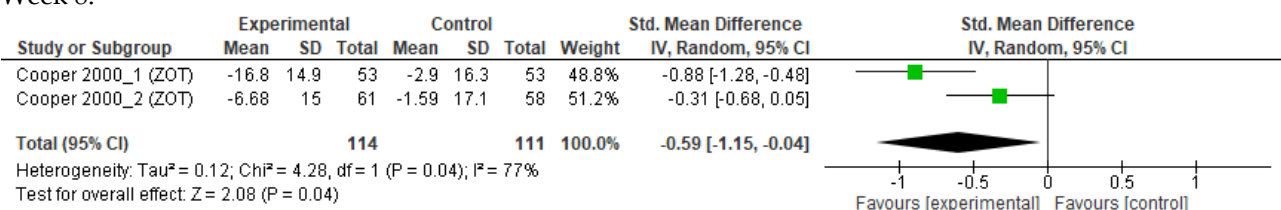

# Week 16:

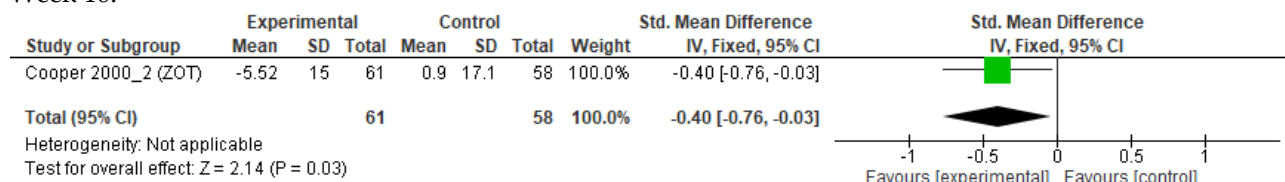

# Week 20:

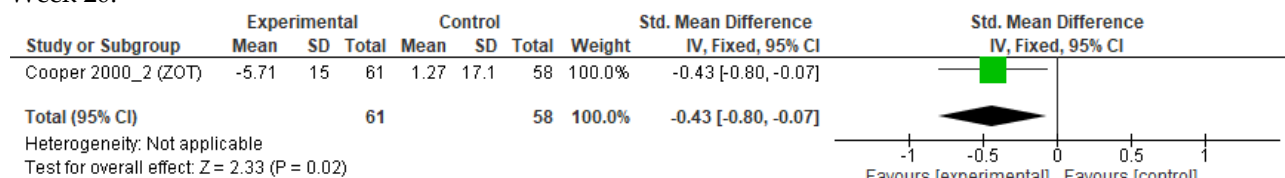

# Week 26:

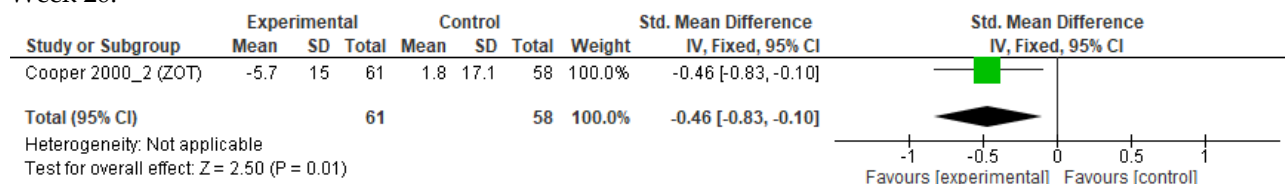

## Supplemental 7 – Sensitivity analyses, enriched vs non-enriched

Illustrates the summary of standardized mean difference in the changes of symptom score from baseline to week 1, 2, 3, 4, 5, 6 with a 95% CI between placebo and sublingual asenapine, olanzapine, quetiapine and quetiapine extended release respectively.  $CHI^2$  expresses the heterogeneity across studies, in each meta-analysis. The meta-analyses were made for the enriched population and the non-enriched population respectively. ([n=number of participants])

### Asenapine, enriched and non-enriched

|         | Enriched                                             | Non-enriched                                       |
|---------|------------------------------------------------------|----------------------------------------------------|
| Studies | Potkin 2007<br>Kinoshita 2016<br>Landbloom 2017      | Kane 2010                                          |
| Week 1  | -0.33 [-0.70, 0.03]<br>$P(CHI^2) = NA$<br>(n=118)    | -0.18 [-0.44, 0.08]<br>$P(CHI^2) = NA$<br>(n=227)  |
| Week 2  | -0.36 [-0.73, 0.00]<br>$P(CHI^2) = NA$<br>(n=118)    | -0.20 [-0.46, 0.06]<br>$P(CHI^2) = NA$<br>(n=227)  |
| Week 3  | -0.62 [-0.99, -0.25]<br>$P(CHI^2) = NA$<br>(n=118)   | -0.20 [-0.46, 0.06]<br>$P(CHI^2) = NA$<br>(n=227)  |
| Week 4  | -0.52 [-0.89, -0.16]<br>$P(CHI^2) = NA$<br>(n=118)   | -0.17 [-0.43, 0.10]<br>$P(CHI^2) = NA$<br>(n=227)  |
| Week 5  | -0.62 [-0.99, -0.25]<br>$P(CHI^2) = NA$<br>(n=118)   | -0.25 [-0.51, 0.01]<br>$P(CHI^2) = NA$<br>(n=227)  |
| Week 6  | -0.53 [-0.68, -0.37]<br>$P(CHI^2) = 0.17$<br>(n=680) | -0.29 [-0.55, -0.02]<br>$P(CHI^2) = NA$<br>(n=227) |

### Olanzapine, enriched and non-enriched

|         | Enriched                                                                                                                                                                      | Non-enriched                                                                                                            |
|---------|-------------------------------------------------------------------------------------------------------------------------------------------------------------------------------|-------------------------------------------------------------------------------------------------------------------------|
| Studies | Bugarski-kirola 2014<br>Davidson 2007<br>Egan 2013<br>Kane 2007<br>Landbloom 2017<br>Lecrubier 2006<br>Litman 2014<br>Marder 2007<br>Potkin 2020<br>Schmidt 2012<br>Shen 2014 | Beasley 1996 (March)<br>Beasley 1996 (July)<br>Corrigan 2004<br>Kinon 2011<br>Meltzer 2011<br>Mosolov 2011<br>Shen 2008 |

|          |                                                                 |                                                                |
|----------|-----------------------------------------------------------------|----------------------------------------------------------------|
| Week 1   | -0.28 [-0.42, -0.13]<br>P(CHI <sup>2</sup> ) = 0.10<br>(n=722)  | -0.27 [-0.42, -0.13]<br>P(CHI <sup>2</sup> ) = 0.38<br>(n=744) |
| Week 2   | -0.38 [-0.53, -0.23]<br>P(CHI <sup>2</sup> ) = 0.06<br>(n=722)  | -0.43 [-0.58, -0.28]<br>P(CHI <sup>2</sup> ) = 0.45<br>(n=738) |
| Week 3   | -0.47 [-0.62, -0.32]<br>P(CHI <sup>2</sup> ) = 0.13<br>(n=722)  | -0.52 [-0.67, -0.37]<br>P(CHI <sup>2</sup> ) = 0.45<br>(n=733) |
| Week 4   | -0.48 [-0.69, -0.26]<br>P(CHI <sup>2</sup> ) = 0.04<br>(n=925)  | -0.55 [-0.68, -0.41]<br>P(CHI <sup>2</sup> ) = 0.10<br>(n=914) |
| Week 5   | -0.80 [-1.03, -0.58]<br>P(CHI <sup>2</sup> ) = 0.59<br>(n=334)  | -0.65 [-0.81, -0.48]<br>P(CHI <sup>2</sup> ) = 0.47<br>(n=585) |
| Week 6   | -0.65 [-0.77, -0.53]<br>P(CHI <sup>2</sup> ) = 0.20<br>(n=1188) | -0.68 [-0.84, -0.53]<br>P(CHI <sup>2</sup> ) = 0.23<br>(n=704) |
| 6 months | -0.12 [-0.53, 0.29]<br>P(CHI <sup>2</sup> ) = NA<br>(n=104)     | -                                                              |

### Quetiapine, enriched and non-enriched

|         | Enriched                                                    | Non-enriched                                                              |
|---------|-------------------------------------------------------------|---------------------------------------------------------------------------|
| Studies | Canuso 2009<br>Kahn 2007<br>Lindenmayer 2008                | Arvanitis 1997<br>Borison 1996<br>Fabre 1995<br>Potkin 2006<br>Small 1997 |
| Week 1  | -0.08 [-0.35, 0.19]<br>P(CHI <sup>2</sup> ) = NA<br>(n=229) | -0.08 [-0.26, 0.10]<br>P(CHI <sup>2</sup> ) = 0.28<br>(n=516)             |
| Week 2  | 0.06 [-0.23, 0.35]<br>P(CHI <sup>2</sup> ) = NA<br>(n=202)  | -0.31 [-0.49, -0.12]<br>P(CHI <sup>2</sup> ) = 0.30<br>(n=487)            |
| Week 3  | -                                                           | -0.40 [-0.63, -0.17]<br>P(CHI <sup>2</sup> ) = 0.30<br>(n=302)            |
| Week 4  | -                                                           | -0.47 [-0.71, -0.24]<br>P(CHI <sup>2</sup> ) = 0.77<br>(n=290)            |

|        |                                                                |                                                                |
|--------|----------------------------------------------------------------|----------------------------------------------------------------|
| Week 5 | -                                                              | -0.49 [-0.72, -0.25]<br>P(CHI <sup>2</sup> ) = 0.76<br>(n=290) |
| Week 6 | -0.27 [-0.47, -0.07]<br>P(CHI <sup>2</sup> ) = 0.18<br>(n=392) | -0.46 [-0.66, -0.26]<br>P(CHI <sup>2</sup> ) = 0.75<br>(n=394) |

### Quetiapine XR, enriched and non-enriched

|         | Enriched                                                       | Non-enriched                                                 |
|---------|----------------------------------------------------------------|--------------------------------------------------------------|
| Studies | Kahn 2007<br>Lindenmayer 2008                                  | Loebel 2013                                                  |
| Week 1  | -                                                              | -0.24 [-0.50, 0.01]<br>P(CHI <sup>2</sup> ) = NA<br>(n=236)  |
| Week 2  | -                                                              | -0.46 [-0.72, -0.20]<br>P(CHI <sup>2</sup> ) = NA<br>(n=236) |
| Week 3  | -                                                              | -0.62 [-0.88, -0.36]<br>P(CHI <sup>2</sup> ) = NA<br>(n=236) |
| Week 4  | -                                                              | -0.76 [-1.02, -0.49]<br>P(CHI <sup>2</sup> ) = NA<br>(n=236) |
| Week 5  | -                                                              | -0.86 [-1.12, -0.59]<br>P(CHI <sup>2</sup> ) = NA<br>(n=236) |
| Week 6  | -0.41 [-0.61, -0.21]<br>P(CHI <sup>2</sup> ) = 0.78<br>(n=395) | -0.89 [-1.16, -0.62]<br>P(CHI <sup>2</sup> ) = NA<br>(n=236) |

\*NA=non-applied

## Supplemental 8 – Sensitivity analyses, withdrawal of placebo-responders

*Illustrates the summary of standardized mean difference in the changes of symptom score from baseline to week 1, 2, 3, 4, 5, 6 with a 95% CI between placebo and olanzapine, quetiapine and zotepine respectively.  $CHI^2$  expresses the heterogeneity across studies in each meta-analysis. The meta-analyses were made by excluding studies reporting withdrawal of placebo-responders before randomization. ([n=number of participants])*

### Olanzapine, without studies reporting withdrawal of placebo-responders

|                 | Placebo responders withdrawn                          |
|-----------------|-------------------------------------------------------|
| Studies removed | Beasley 1996_1<br>Beasley 1996_2                      |
| Week 1          | -0.30 [-0.42, -0.18]<br>$P(CHI^2) = 0.17$<br>(n=1012) |
| Week 2          | -0.43 [-0.55, -0.30]<br>$P(CHI^2) = 0.13$<br>(n=1012) |
| Week 3          | -0.50 [-0.63, -0.38]<br>$P(CHI^2) = 0.49$<br>(n=1012) |
| Week 4          | -0.47 [-0.58, -0.35]<br>$P(CHI^2) = 0.13$<br>(n=1152) |
| Week 5          | -0.61 [-0.76, -0.46]<br>$P(CHI^2) = 0.14$<br>(n=747)  |
| Week 6          | -0.62 [-0.72, -0.52]<br>$P(CHI^2) = 0.30$<br>(n=1601) |

### Quetiapine, without studies reporting withdrawal of placebo-responders

|                 | Placebo responders withdrawn                         |
|-----------------|------------------------------------------------------|
| Studies removed | Arvanitis 1997                                       |
| Week 6          | -0.26 [-0.41, -0.11]<br>$P(CHI^2) = 0.55$<br>(n=686) |

## Zotepine, without studies reporting withdrawal of placebo-responders

|                 |                                                                |
|-----------------|----------------------------------------------------------------|
|                 | Placebo responders withdrawn                                   |
| Studies removed | Moller 2004                                                    |
| Week 8          | -0.59 [-1.15, -0.03]<br>P(CHI <sup>2</sup> ) = 0.04<br>(n=225) |

## References

1. Page, M.J.; McKenzie, J.E.; Bossuyt, P.M.; Boutron, I.; Hoffmann, T.C.; Mulrow, C.D.; Al., E. The PRISMA 2020 Statement: An Updated Guideline for Reporting Systematic Reviews. *BMJ* **2021**, *372*, n71, doi:10.1136/bmj.n71.
2. Potkin, S.G.; Cohen, M.; Panagides, J. Efficacy and Tolerability of Asenapine in Acute Schizophrenia: A Placebo- and Risperidone-Controlled Trial. *J. Clin. Psychiatry* **2007**, *68*, 1492–1500.
3. Kane, J.M.; Cohen, M.; Zhao, J.; Alphs, L.; Panagides, J. Efficacy and Safety of Asenapine in a Placebo- and Haloperidol-Controlled Trial in Patients with Acute Exacerbation of Schizophrenia. *J. Clin. Psychopharmacol.* **2010**, *30*, 106–115, doi:10.1097/JCP.0b013e3181d35d6b.
4. Kinoshita, T.; Bai, Y.-M.; Kim, J.-H.; Miyake, M.; Oshima, N. Efficacy and Safety of Asenapine in Asian Patients with an Acute Exacerbation of Schizophrenia: A Multicentre, Randomized, Double-Blind, 6-Week, Placebo-Controlled Study. *Psychopharmacology (Berl.)* **2016**, *233*, 2663–2674, doi:10.1007/s00213-016-4295-9.
5. Landbloom, R.; Mackle, M.; Wu, X.; Kelly, L.; Snow-Adami, L.; McIntyre, R.S.; Mathews, M.; Hundt, C. Asenapine for the Treatment of Adults with an Acute Exacerbation of Schizophrenia: Results from a Randomized, Double-Blind, Fixed-Dose, Placebo-Controlled Trial with Olanzapine as an Active Control. *CNS Spectr.* **2017**, *22*, 333–341, doi:10.1017/S1092852916000377.
6. Citrome, L.; Walling, D.P.; Zeni, C.M.; Starling, B.R.; Terahara, T.; Kuriki, M.; Park, A.S.; Komaroff, M. Efficacy and Safety of HP-3070, an Asenapine Transdermal System, in Patients With Schizophrenia: A Phase 3, Randomized, Placebo-Controlled Study. *J. Clin. Psychiatry* **2020**, *82*, 20m13602, doi:10.4088/JCP.20m13602.
7. Lecrubier, Y.; Quintin, P.; Bouhassira, M.; Perrin, E.; Lancrenon, S. The Treatment of Negative Symptoms and Deficit States of Chronic Schizophrenia: Olanzapine Compared to Amisulpride and Placebo in a 6-Month Double-Blind Controlled Clinical Trial. *Acta Psychiatr. Scand.* **2006**, *114*, 319–327, doi:10.1111/j.1600-0447.2006.00887.x.
8. Meltzer, H.Y.; Cucchiaro, J.; Silva, R.; Ogasa, M.; Phillips, D.; Xu, J.; Kalali, A.H.; Schweizer, E.; Pikalov, A.; Loebel, A. Lurasidone in the Treatment of Schizophrenia: A Randomized, Double-Blind, Placebo- and Olanzapine-Controlled Study. *Am. J. Psychiatry* **2011**, *168*, 957–967, doi:10.1176/appi.ajp.2011.10060907.
9. Beasley, C.M.J.; Tollefson, G.; Tran, P.; Satterlee, W.; Sanger, T.; Hamilton, S. Olanzapine versus Placebo and Haloperidol: Acute Phase Results of the North American Double-Blind Olanzapine Trial. *Neuropsychopharmacology* **1996**, *14*, 111–123, doi:10.1016/0893-133X(95)00069-P.
10. Beasley, C.M.J.; Sanger, T.; Satterlee, W.; Tollefson, G.; Tran, P. Olanzapine versus Placebo: Results of a Double-Blind, Fixed Dose Olanzapine Trial. *Psychopharmacology (Berl.)* **1996**, *124*, 159–167, doi:http://dx.doi.org/10.1007/BF02245617.
11. Corrigan, M.H.; Gallen, C.C.; Bonura, M.L.; Merchant, K.M. Effectiveness of the Selective D4 Antagonist Sonepiprazole in Schizophrenia: A Placebo-Controlled Trial. *Biol. Psychiatry* **2004**, *55*, 445–451, doi:10.1016/j.biopsych.2003.10.004.
12. Marder, S.R.; Kramer, M.; Ford, L.; Eerdekens, E.; Lim, P.; Eerdekens, M.; Lowy, A. Efficacy and Safety of Paliperidone Extended-Release Tablets: Results of a 6-Week, Randomized, Placebo-Controlled Study. *Biol. Psychiatry* **2007**, *62*, 1363–1370, doi:10.1016/j.biopsych.2007.01.017.
13. Schmidt, M.E.; Kent, J.M.; Daly, E.; Janssens, L.; Van Osselaer, N.; Husken, G.; Anghelescu, I.-G.; Van Nueten, L. A Double-Blind, Randomized, Placebo-Controlled Study with JNJ-37822681, a Novel, Highly Selective, Fast Dissociating D(2) Receptor Antagonist in the Treatment of Acute Exacerbation of Schizophrenia. *Eur. Neuropsychopharmacol.* **2012**, *22*, 721–733, doi:10.1016/j.euroneuro.2012.02.007.
14. Bugarski-Kirola, D.; Wang, A.; Abi-Saab, D.; Blattler, T. A Phase II/III Trial of Bitopertin Monotherapy Compared with Placebo in Patients with an Acute Exacerbation of Schizophrenia - Results from the CandleLyte Study. *Eur. Neuropsychopharmacol.* **2014**, *24*, 1024–1036, doi:10.1016/j.euroneuro.2014.03.007.



15. Shen, J.H.Q.; Zhao, Y.; Rosenzweig-Lipson, S.; Popp, D.; Williams, J.B.W.; Giller, E.; Detke, M.J.; Kane, J.M. A 6-Week Randomized, Double-Blind, Placebo-Controlled, Comparator Referenced Trial of Vabicaserin in Acute Schizophrenia. *J. Psychiatr. Res.* **2014**, *53*, 14–22, doi:10.1016/j.jpsychires.2014.02.012.
16. Davidson, M.; Emsley, R.; Kramer, M.; Ford, L.; Pan, G.; Lim, P.; Eerdekens, M. Efficacy, Safety and Early Response of Paliperidone Extended-Release Tablets (Paliperidone ER): Results of a 6-Week, Randomized, Placebo-Controlled Study. *Schizophr. Res.* **2007**, *93*, 117–130, doi:10.1016/j.schres.2007.03.003.
17. Kane, J.; Canas, F.; Kramer, M.; Ford, L.; Gassmann-Mayer, C.; Lim, P.; Eerdekens, M. Treatment of Schizophrenia with Paliperidone Extended-Release Tablets: A 6-Week Placebo-Controlled Trial. *Schizophr. Res.* **2007**, *90*, 147–161, doi:10.1016/j.schres.2006.09.012.
18. Potkin, S.G.; Kunovac, J.; Silverman, B.L.; Simmons, A.; Jiang, Y.; DiPetrillo, L.; McDonnell, D. Efficacy and Safety of a Combination of Olanzapine and Samidorphan in Adult Patients with an Acute Exacerbation of Schizophrenia: Outcomes from the Randomized, Phase 3 ENLIGHTEN-1 Study. *J. Clin. Psychiatry* **2020**, *81*, 19m12769, doi:10.4088/JCP.19m12769.
19. Egan, M.F.; Zhao, X.; Smith, A.; Troyer, M.D.; Uebele, V.N.; Pidkorytov, V.; Cox, K.; Murphy, M.; Snively, D.; Lines, C.; et al. Randomized Controlled Study of the T-Type Calcium Channel Antagonist MK-8998 for the Treatment of Acute Psychosis in Patients with Schizophrenia. *Hum. Psychopharmacol.* **2013**, *28*, 124–133, doi:10.1002/hup.2289.
20. Kinon, B.J.; Zhang, L.; Millen, B.A.; Osuntokun, O.O.; Williams, J.E.; Kollack-Walker, S.; Jackson, K.; Kryzhanovskaya, L.; Jarkova, N. A Multicenter, Inpatient, Phase 2, Double-Blind, Placebo-Controlled Dose-Ranging Study of LY2140023 Monohydrate in Patients with DSM-IV Schizophrenia. *J. Clin. Psychopharmacol.* **2011**, *31*, 349–355, doi:10.1097/JCP.0b013e318218dcd5.
21. Litman, R.E.; Smith, M.A.; Desai, D.G.; Simpson, T.; Sweitzer, D.; Kanes, S.J. The Selective Neurokinin 3 Antagonist AZD2624 Does Not Improve Symptoms or Cognition in Schizophrenia: A Proof-of-Principle Study. *J. Clin. Psychopharmacol.* **2014**, *34*, 199–204, doi:10.1097/JCP.0000000000000071.
22. Mosolov, S.N.; Smulevich, A.B.; Neznanov, N.G.; Tochilov, V.A.; Andreev, B. V.; Avedisova, A.S.; Bardenstein, L.M.; Gurovich, Iy.; Reznik, A.M.; Zharkova, N.B.; et al. MGlu2/3 Agonists - A New Approach to the Treatment of Schizophrenia: Results of a Randomized Double-Blind Trial. *Neurosci. Behav. Physiol.* **2011**, *41*, 559–566, doi:10.1007/s11055-011-9455-0.
23. Shen, J.; Kobak, K.A.; Zhao, Y.; Alexander, M.M.; Kane, J.M. Use of Remote Centralized Raters via Live 2-Way Video in a Multicenter Clinical Trial for Schizophrenia. *J. Clin. Psychopharmacol.* **2008**, *28*, 691–693, doi:http://dx.doi.org/10.1097/JCP.0b013e31818c9ba3.
24. Lauriello, J.; Lambert, T.; Andersen, S.; Lin, D.; Taylor, C.C.; McDonnell, D. An 8-Week, Double-Blind, Randomized, Placebo-Controlled Study of Olanzapine Long-Acting Injection in Acutely Ill Patients with Schizophrenia. *J. Clin. Psychiatry* **2008**, *69*, 790–799.
25. Fabre, L.F.J.; Arvanitis, L.; Pultz, J.; Jones, V.M.; Malick, J.B.; Slotnick, V.B. ICI 204,636, a Novel, Atypical Antipsychotic: Early Indication of Safety and Efficacy in Patients with Chronic and Subchronic Schizophrenia. *Clin. Ther.* **1995**, *17*, 366–378.
26. Borison, R.L.; Arvanitis, L.A.; Miller, B.G. ICI 204,636, an Atypical Antipsychotic: Efficacy and Safety in a Multicenter, Placebo-Controlled Trial in Patients with Schizophrenia. U.S. SEROQUEL Study Group. *J. Clin. Psychopharmacol.* **1996**, *16*, 158–169.
27. Arvanitis, L.A.; Miller, B.G. Multiple Fixed Doses of “Seroquel” (Quetiapine) in Patients with Acute Exacerbation of Schizophrenia: A Comparison with Haloperidol and Placebo. The Seroquel Trial 13 Study Group. *Biol. Psychiatry* **1997**, *42*, 233–246.
28. Small, J.G.; Hirsch, S.R.; Arvanitis, L.A.; Miller, B.G.; Link, C.G. Quetiapine in Patients with Schizophrenia. A High- and Low-Dose Double-Blind Comparison with Placebo. Seroquel Study Group. *Arch. Gen. Psychiatry* **1997**, *54*, 549–557.
29. Potkin, S.G.; Gharabawi, G.M.; Greenspan, A.J.; Mahmoud, R.; Kosik-Gonzalez, C.; Rupnow, M.F.T.; Bossie, C.A.; Davidson, M.; Burtea, V.; Zhu, Y.; et al. A Double-Blind Comparison of Risperidone,

- Quetiapine and Placebo in Patients with Schizophrenia Experiencing an Acute Exacerbation Requiring Hospitalization. *Schizophr. Res.* **2006**, *85*, 254–265, doi:10.1016/j.schres.2006.03.027.
30. Canuso, C.M.; Dirks, B.; Carothers, J.; Kosik-Gonzalez, C.; Bossie, C.A.; Zhu, Y.; Damaraju, C. V.; Kalali, A.H.; Mahmoud, R. Randomized, Double-Blind, Placebo-Controlled Study of Paliperidone Extended-Release and Quetiapine in Inpatients with Recently Exacerbated Schizophrenia. *Am. J. Psychiatry* **2009**, *166*, 691–701, doi:10.1176/appi.ajp.2009.08040613.
  31. Loebel, A.; Cucchiaro, J.; Sarma, K.; Xu, L.; Hsu, C.; Kalali, A.H.; Pikalov, A.; Potkin, S.G. Efficacy and Safety of Lurasidone 80 Mg/Day and 160 Mg/Day in the Treatment of Schizophrenia: A Randomized, Double-Blind, Placebo- and Active-Controlled Trial. *Schizophr. Res.* **2013**, *145*, 101–109, doi:10.1016/j.schres.2013.01.009.
  32. Kahn, R.S.; Schulz, S.C.; Palazov, V.D.; Reyes, E.B.; Brecher, M.; Svensson, O.; Andersson, H.M.; Meulien, D. Efficacy and Tolerability of Once-Daily Extended Release Quetiapine Fumarate in Acute Schizophrenia: A Randomized, Double-Blind, Placebo-Controlled Study. *J. Clin. Psychiatry* **2007**, *68*, 832–842.
  33. Lindenmayer, J.-P.; Brown, D.; Liu, S.; Brecher, M.; Meulien, D. The Efficacy and Tolerability of Once-Daily Extended Release Quetiapine Fumarate in Hospitalized Patients with Acute Schizophrenia: A 6-Week Randomized, Double-Blind, Placebo-Controlled Study. *Psychopharmacol. Bull.* **2008**, *41*, 11–35.
  34. Cooper, S.J.; Tweed, J.; Raniwalla, J.; Butler, A.; Welch, C. A Placebo-Controlled Comparison of Zotepine versus Chlorpromazine in Patients with Acute Exacerbation of Schizophrenia. *Acta Psychiatr. Scand.* **2000**, *101*, 218–225.
  35. Cooper, S.J.; Butler, A.; Tweed, J.; Welch, C.; Raniwalla, J. Zotepine in the Prevention of Recurrence: A Randomised, Double-Blind, Placebo-Controlled Study for Chronic Schizophrenia. *Psychopharmacology (Berl)*. **2000**, *150*, 237–243.
  36. Moller, H.J.; Riedel, M.; Muller, N.; Fischer, W.; Kohnen, R. Zotepine versus Placebo in the Treatment of Schizophrenic Patients with Stable Primary Negative Symptoms: A Randomized Double-Blind Multicenter Trial. *Pharmacopsychiatry* **2004**, *37*, 270–278, doi:10.1055/s-2004-832683.
  37. Sterne, J.; Savović, J.; Page, M.; Elbers, R.; Blencowe, N.; Boutron, I.; Cates, C.; Cheng, H.-Y.; Corbett, M.; Eldridge, S.; et al. RoB 2: A Revised Tool for Assessing Risk of Bias in Randomised Trials. *BMJ* **2019**, *l4898*, doi:doi: 10.1136/bmj.l4898.
